# Supplementary material for: Self-Organizing Maps: An AI Tool for Identifying Unexpected Source Signatures in Non-Target Screening Analysis of Urban Wastewater by HPLC-HRMS
Source: MDPI journal article supplement (doi:10.3390/toxics12020113), 2024-01-29

# SUPPLEMENTARY MATERIAL

## **Self-Organizing Maps: an AI tool for identifying unexpected source signatures in urban wastewater non-target screening analysis by HPLC-HRMS**

Vito Gelao <sup>1</sup>, Stefano Fornasaro <sup>2</sup>, Sara C. Briguglio <sup>1</sup>, Michele Mattiussi <sup>1</sup>, Stefano De Martin <sup>1</sup>, Aleksander M. Astel <sup>3</sup>, Pierluigi Barbieri <sup>2</sup> and Sabina Licen <sup>2,\*</sup>

Table S1: List of standards

Table S2: Mass spectrometer settings

Figure S1: Untargeted analysis workflow

Table S3: “Unknown common” compound list

Figure S2: Comparison of the node and sample signatures

**Table S1: List of standards**

| Table S1-1 – Pesticide mixtures                        |                      |                          |                    |                      |                       |
|--------------------------------------------------------|----------------------|--------------------------|--------------------|----------------------|-----------------------|
| Reference material                                     | Compounds            |                          |                    |                      |                       |
| Mix Custom 1<br>100 mg/l (ACN)<br>Neochema             | Methoxyfenozide      | Tebufofenozide           | Pirimicarb         | Bupimirate           | Mandipropamid         |
|                                                        | Metrafenone          | Diethofencarb            | Profenfos          | Chlorpyrifos-methyl  | Monocrotophos         |
|                                                        | Pyraclostrobin       | Ethoprophos              | Thiodicarb         | Cyproconazole        | Oxamyl                |
|                                                        | Pyriproxyfen         | Flufenoxuron             | Triazophos         | Pirimicarb-desmethyl |                       |
|                                                        | Spiroxamine          | Phosphamidon             | Benalaxyl          | Fluopyram            |                       |
| Mix Custom 2<br>100 mg/l (ACN)<br>Neochema             | Cyprodinil           | Fludioxonil              | Phosalone          | Tebunfenpyrad        | Fipronil-sulfone      |
|                                                        | Etofenprox           | Hexaconazole             | Propargite         | Triadimenol          | Propiconazole         |
|                                                        | Fenamidone           | Indoxacarb               | Propham            | Trifloxystrobin      | Tetraconazole         |
|                                                        | Fenazaquin           | Mepanipyrim              | Pyridaben          | Spinosad (A+D)       |                       |
|                                                        | Fipronil             | Myclobutanil             | Tebuconazole       | Carbaryl             |                       |
| Mix Custom<br>100 mg/l (ACN)<br>Neochema               | Acephate             | Demeton-S-methyl-sulfone | Fenamiphos         | Fenthion-oxon        | Oxadixyl              |
|                                                        | Aldicarb             | Diflubenzuron            | Fenarimol          | Flubendiamide        | Paclobutrazol         |
|                                                        | Aldicarb-sulfone     | (E)-Diniconazole         | Fenoxycarb         | Fluxapyroxad         | Proquinazid           |
|                                                        | Cyazofamid           | Ethirimol                | Fenpropidin        | Hexythiazox          | Prosulfocarb          |
|                                                        | Cyromazine           | Etoxazole                | Fenpyroximate      | Malaoxon             | Triflumuron           |
| Mix Custom<br>100 mg/l (ACN)<br>Neochema               | Permethrin           | Clofentezine             | Difenoconazole     | Flutolanil           | Thiabendazole         |
|                                                        | Fenpropathrin        | Dimethomorph             | Epoxiconazole      | Flutriafol           | Zoxamide              |
|                                                        | Toclofos-methyl      | Fosthiazate              | Fenbuconazole      | Fluquinconazole      |                       |
|                                                        | Fenpropimorph        | Azoxystrobin             | Fluopicolide       | Imazalil             |                       |
|                                                        | Lufenuron            | Buprofezin               | Flusilazole        | Pencycuron           |                       |
| Mix Custom 3<br>100 mg/l (ACN)<br>Neochema             | Ametocradin          | Fenamiphos-sulfone       | Fenthion-sulfoxide | Phosmet-oxon         | Fenthion-oxon-sulfone |
|                                                        | Aldicarb-sulfoxide   | Fenthion-oxon-sulfoxide  | Fenthion-sulfone   | Teflubenzuron        | Phosmet               |
|                                                        | Fenamiphos-sulfoxide |                          |                    |                      |                       |
| Mix Custom 4<br>100 mg/l (ACN)<br>Neochema             | Methiocarb-sulfone   |                          |                    |                      |                       |
|                                                        | Methiocarb-sulfoxide |                          |                    |                      |                       |
| Mix Custom 5<br>100 mg/l (ACN)<br>Absolute<br>Standard | Iprovalicarb         | Metalaxyl                | Pendimethalin      | Quinoxyfen           | Thiacloprid           |
|                                                        | Kresoxim methyl      | Metolachlor              | Piperonyl butoxide | Sebuthylazine        | Thiamethoxam          |
|                                                        | Lenacil              | Metolachlor-ESA          | Propazine          | Simazine             | Triallate             |
|                                                        | MCPA                 | Metribuzin               | Propyzamide        | Terbuthylazine       |                       |
|                                                        | Mecoprop             | Penconazole              | Pyrimethanil       | Terbutryn            |                       |
| Mix Custom 6<br>100 mg/l (ACN)<br>Absolute             | 2,4,5-T              | Atrazine                 | Carbendazim        | Cybutryne            | Fenhexamid            |
|                                                        | 2,4-D                | Azinphos ethyl           | Chlorfenvinphos    | Cymoxanil            | Flufenacet            |
|                                                        | Acetamiprid          | Bentazon                 | Chloridazon        | Deethylatrazine      | Imidacloprid          |

| Standard          | Acetochlor      | Boscalid     | Chlotianidin      | Terbuthylazine-desethyl |                    |
|-------------------|-----------------|--------------|-------------------|-------------------------|--------------------|
|                   | Alachlor        | Bromacil     | Cyanazine         | Atrazine-desisopropyl   |                    |
| Mix Custom 7      | Methidathion    | Monolinuron  | Omethoate         | Pirimiphos-ethyl        | Temephos           |
| 100 mg/l (ACN)    | Methiocarb      | Monuron      | Oxydemeton methyl | Pirimiphos-methyl       | Tetrachlorvinphos  |
| Absolute Standard | Mevinphos       | Nicosulfuron | Pethoxamid        | Pyridaphenthion         | Thiophanate-methyl |
| Mix Custom 8      | Azinphos methyl | Diazinon     | Ethion            | Heptenophos             | Linuron            |
| 100 mg/l (ACN)    | Chlopyrifos     | Dimethoate   | Fenthion          | Imazamox                | Malathion          |
| Absolute Standard | Chlortoluron    | Diuron       | Fluazifop-butyl   | Isoproturon             | Methamidophos      |

**Table S1-2** Perfluorinated compound (PFAC) mixture

| Reference material                                            | Compounds |         |
|---------------------------------------------------------------|-----------|---------|
| Mix PFAC<br>2mg/l<br>(MeOH 1% H <sub>2</sub> O)<br>Wellington | PFBA      | PFNS    |
|                                                               | PFBS      | PFDA    |
|                                                               | PFPeA     | PFDS    |
|                                                               | PFPeS     | PFUnA   |
|                                                               | PFHx<br>A | PFDoA   |
|                                                               | PFHxS     | PFDoS   |
|                                                               | PFHp<br>A | PFTTrDA |
|                                                               | PFHp<br>S | PFTeDA  |
|                                                               | PFOA      | PFHxDA  |
|                                                               | PFOS      | PFODA   |
|                                                               | PFNA      |         |

**Table S1-3** PFAS

| Reference material                    | Compound                                                                                            |
|---------------------------------------|-----------------------------------------------------------------------------------------------------|
| Powder<br>Toronto Research Chemicals  | 2,3,3,3-tetrafluoro-2-(heptafluoropropoxy)propanoic acid (GenX)                                     |
| Solution obtained by the manufacturer | 2,2-difluoro-2-[[2,2,4,5-tetrafluoro-5-(trifluoromethoxy)-1,3-dioxolan-4-yl]oxy]acetic acid (cC6O4) |

**Table S1-4** - Pesticides

| Reference material                  | Compound                            |
|-------------------------------------|-------------------------------------|
| 100 mg/l (ACN+0,1% formic acid) HCP | 6-Chloro-1,3,5-triazine-2,4-diamine |
| 100 mg/l (ACN+0,1% formic acid) HCP | 2-Hydroxyatrazine                   |
| 100 mg/l (ACN+0,1% formic acid) HCP | 2-Hydroxyterbutylazine              |
| 100 mg/l (ACN+0,1% formic acid) HCP | Carbofuran                          |

|                                     |                               |
|-------------------------------------|-------------------------------|
| 100 mg/l (ACN+0,1% formic acid) HCP | Carbofuran-3-hydroxy          |
| 100 mg/l (ACN+0,1% formic acid) HCP | Chlorantraniprole             |
| 100 mg/l (ACN) HCP                  | Chlorpyrifos-methyl-desmethyl |
| 100 mg/l (ACN) HCP                  | Dimoxystrobin                 |
| 100 mg/l (ACN+0,1% formic acid) HCP | Famoxadone                    |
| 100 mg/l (ACN) HCP                  | Ipconazole                    |
| 100 mg/l (ACN) HCP                  | Metalflumizone                |
| 100 mg/l (ACN) HCP                  | Metconazole                   |
| 100 mg/l (ACN) HCP                  | Metolachlor-OA                |
| 100 mg/l (ACN+0,1% formic acid) HCP | Methomyl                      |
| 100 mg/l (ACN+0,1% formic acid) HCP | Prochloraz                    |
| 100 mg/l (ACN+0,1% formic acid) HCP | Propoxur                      |

**Table S1-5** – PPCP (Pharmaceutical and Personal Care Products)

| Reference material                 | Compound               |
|------------------------------------|------------------------|
| Powder Toronot Research Chemicals  | Amoxicillin            |
| Powder Dr Ehrenstorfer             | Atenolol               |
| Powder Dr Ehrenstorfer             | Carbamazepine          |
| Powder Dr Ehrenstorfer             | Clotrimazole           |
| Powder Dr Ehrenstorfer             | Diazepam               |
| Powder Dr Ehrenstorfer             | Diclofenac             |
| Powder Dr Ehrenstorfer             | Fluconazole            |
| Powder Dr Ehrenstorfer             | Ketoprofen             |
| Powder Dr Ehrenstorfer             | Miconazole             |
| Powder PharmaA2S                   | O-Desmethylvenlafaxine |
| Powder Dr Ehrenstorfer             | Paracetamol            |
| 100 mg/l (MeOH) Neochema           | Quassin                |
| Powder Biosynth Carbosynth         | Sulfamethoxazole       |
| Powder Biosynth Carbosynth         | Trimethoprim           |
| 1000 mg/l (MeOH) Absolute Standard | Venlafaxine            |
| 100 mg/l (MeOH) Neochema           | Teucrin A              |

**Table S2: Mass spectrometer settings**

| Experiment                         | Parameter                    | ESI+            | ESI-            |
|------------------------------------|------------------------------|-----------------|-----------------|
| <b>Global</b>                      | Polarity                     | positive        | negative        |
|                                    | Spray voltage                | 3'300           | 3'400           |
|                                    | Capillary Temperature        | 290             | 300             |
|                                    | Sheath gas                   | 44              | 44              |
|                                    | Aux gas                      | 12              | 12              |
|                                    | Probe heater temperature     | 280             | 300             |
|                                    | S-Lens RF Level              | 50              | 50              |
|                                    | dd-MS <sup>2</sup>           | Discovery       | Discovery       |
| <b>Full-MS</b>                     | Resolution                   | 70'000          | 70'000          |
|                                    | # Scan ranges                | 1               | 1               |
|                                    | Scan range                   | 75 to 1'000 m/z | 75 to 1'000 m/z |
|                                    | AGC target                   | 1e6             | 1e6             |
|                                    | Maximum IT                   | 240 ms          | 240 ms          |
|                                    | Microscans                   | 1               | 1               |
|                                    | Spectrum data type           | Profile         | Profile         |
|                                    | dd-MS <sup>2</sup> Discovery |                 |                 |
| <b>dd-MS<sup>2</sup> Discovery</b> | Resolution                   | 17'500          | 17'500          |
|                                    | Isolation window             | 2.0 m/z         | 3.0 m/z         |
|                                    | Isolation offset             | —               | —               |
|                                    | (N)CE / stepped (N)CE        | nce: 20, 40, 90 | nce: 20, 40, 90 |
|                                    | Fixed first mass             | —               | —               |
|                                    | Default charge state         | 1               | 1               |
|                                    | AGC target                   | 2e5             | 2e5             |
|                                    | Maximum IT                   | 65 ms           | 65 ms           |
|                                    | Loop count                   | 2               | 2               |
|                                    | Minimum AGC target           | 8.00e3          | 8.00e3          |
|                                    | Intensity threshold          | 1.2e5           | 1.2e5           |
|                                    | Apex trigger                 | —               | —               |
|                                    | Dynamic exclusion            | 1.5 s           | Auto            |
|                                    | Charge exclusion             | —               | —               |
|                                    | Exclude isotopes             | on              | on              |
|                                    | Spectrum data type           | Profile         | Profile         |

**Figure S1: Untargeted analysis workflow**

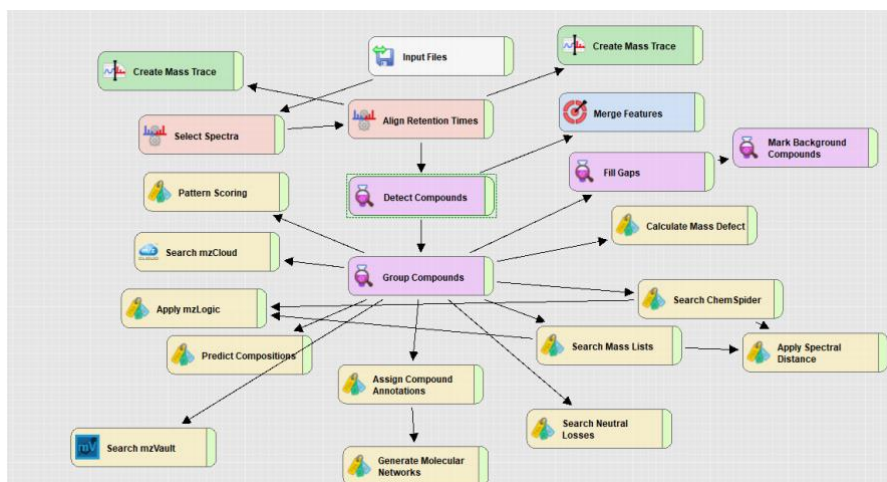

#### Workflow description:

"Input Files" and "Select Spectra" Node: selection of the recorded spectra for each sample and definition of the characteristics of the acquisitions such as resolution, polarity, mass fragmentation, the mass range and the retention time range to be subjected to processing.

"Align Retention Time": Node alignment of the retention times of the sample peaks according to the protocol for non-target screening analysis [39, 40].

"Detection Compounds" Node: identification of  $m/z$  ("features") and their related retention time, isotopic pattern, and ionic adduct.

"Mark background" Node: the features also present in the blanks are marked as background.

"Group Compounds" and "Fill gaps" Node: features grouping according to the  $m/z$  and retention time. In this step the MS2 fragmentation spectra are associated to the features and an overall chromatogram is generated filling the gaps with the data available from each sample. The result is a list of "Compounds".

"Predict Composition" Node: the isotopic pattern accurate mass and, if present, the MS2 fragmentation are used for predicting the "Compounds" molecular formula.

The following nodes are used for compound identification in the following databases: Norman SusDat, Compound Database EFS Thermo Fisher, Chempider), mzCloud, MassBank.

Finally for each Compound one or more structures are proposed ("annotations") with a level of confidence.

**Table S4: “Unknown common” compound list**

| Identification level | Name                                 | Formula          | Calc. MW  | RT [min] |
|----------------------|--------------------------------------|------------------|-----------|----------|
| Level 1              | Sulfamethoxazole                     | C10 H11 N3 O3 S  | 253.0521  | 9.189    |
| Level 1              | Terbutryn                            | C10 H19 N5 S     | 241.13609 | 18.001   |
| Level 1              | Diclofenac                           | C14 H11 Cl2 N O2 | 295.01685 | 18.602   |
| Level 1              | Trimethoprim                         | C14 H18 N4 O3    | 290.13798 | 8.139    |
| Level 1              | Atenolol acid                        | C14 H21 N O4     | 267.147   | 7.81     |
| Level 1              | Carbamazepine                        | C15 H12 N2 O     | 236.09503 | 14.606   |
| Level 1              | Ketoprofen                           | C16 H14 O3       | 254.09434 | 16.244   |
| Level 1              | O-Desmethylvenlafaxine               | C16 H25 N O2     | 263.18852 | 9.625    |
| Level 1              | Diuron                               | C9 H10 Cl2 N2 O  | 232.01703 | 15.745   |
| Level 1              | Carbendazim                          | C9 H9 N3 O2      | 191.06968 | 9.323    |
| Level 2              | Adenosine                            | C10 H13 N5 O4    | 267.09661 | 5.58     |
| Level 2              | Hordenine                            | C10 H15 N O      | 165.11546 | 3.733    |
| Level 2              | 1-Adamantanamine                     | C10 H17 N        | 151.13614 | 9.309    |
| Level 2              | Terbutryn-OH                         | C10 H19 N5 O S   | 257.13113 | 15.568   |
| Level 2              | Scoparone                            | C11 H10 O4       | 206.05807 | 11.014   |
| Level 2              | Sulfapyridine                        | C11 H11 N3 O2 S  | 249.05716 | 7.029    |
| Level 2              | 4-Formylaminoantipyrine              | C12 H13 N3 O2    | 231.10092 | 7.949    |
| Level 2              | N4-Acetylsulfamethoxazole            | C12 H13 N3 O4 S  | 295.06275 | 10.953   |
| Level 2              | DEET                                 | C12 H17 N O      | 191.13111 | 16.285   |
| Level 2              | Sotalol                              | C12 H20 N2 O3 S  | 272.11922 | 5.667    |
| Level 2              | Citroflex 2                          | C12 H20 O7       | 276.12087 | 13.895   |
| Level 2              | Memantine                            | C12 H21 N        | 179.16755 | 13.362   |
| Level 2              | PPG n4                               | C12 H26 O5       | 250.17778 | 11.459   |
| Level 2              | PPG n4                               | C12 H26 O5       | 250.17782 | 11.625   |
| Level 2              | PPG n4                               | C12 H26 O5       | 250.17801 | 11.777   |
| Level 2              | PPG n4                               | C12 H26 O5       | 250.17803 | 12.079   |
| Level 2              | PPG n4                               | C12 H26 O5       | 250.17791 | 12.287   |
| Level 2              | Fluconazole                          | C13 H12 F2 N6 O  | 306.10414 | 10.699   |
| Level 2              | N,N'-Diphenylguanidine               | C13 H13 N3       | 211.1111  | 9.156    |
| Level 2              | 4-Acetamidoantipyrine                | C13 H15 N3 O2    | 245.11647 | 8.106    |
| Level 2              | Lacosamide                           | C13 H18 N2 O3    | 250.13176 | 10.212   |
| Level 2              | N,N'-Dicyclohexylurea                | C13 H24 N2 O     | 224.18884 | 16.936   |
| Level 2              | N-Cyclohexyl-N-methylcyclohexanamine | C13 H25 N        | 195.1988  | 10.189   |
| Level 2              | N-Ethyl-4-menthane-3-carboxamide     | C13 H25 N O      | 211.19365 | 17.912   |
| Level 2              | Niflumic acid                        | C13 H9 F3 N2 O2  | 282.0619  | 17.934   |
| Level 2              | Valsartan metabolite                 | C14 H10 N4 O2    | 266.08048 | 12.775   |
| Level 2              | 4'-Hydroxydiclofenac                 | C14 H11 Cl2 N O3 | 311.01184 | 16.467   |
| Level 2              | Lidocaine                            | C14 H22 N2 O     | 234.17325 | 8.697    |
| Level 2              | Lidocaine N-oxide                    | C14 H22 N2 O2    | 250.16848 | 10.289   |
| Level 2              | Atenolol                             | C14 H22 N2 O3    | 266.16312 | 6.216    |
| Level 2              | Tapentadol                           | C14 H23 N O      | 221.178   | 10.577   |

| Identification level | Name                                                           | Formula            | Calc. MW  | RT [min] |
|----------------------|----------------------------------------------------------------|--------------------|-----------|----------|
| Level 2              | Tetrakis(2-hydroxypropyl)ethylenediamine                       | C14 H32 N2 O4      | 292.23614 | 5.665    |
| Level 2              | Carbamazepine 10,11-epoxide                                    | C15 H12 N2 O2      | 252.09007 | 12.474   |
| Level 2              | Oxcarbazepine                                                  | C15 H12 N2 O2      | 252.08998 | 13.196   |
| Level 2              | Carbamazepine 10,11-epoxide isomero                            | C15 H12 N2 O2      | 252.08985 | 13.301   |
| Level 2              | Clopidogrel carboxylic acid                                    | C15 H14 Cl N O2 S  | 307.04344 | 11.405   |
| Level 2              | 10-Hydroxycarbazepine                                          | C15 H14 N2 O2      | 254.10565 | 12.444   |
| Level 2              | 10-Hydroxycarbazepine isomero                                  | C15 H14 N2 O2      | 254.1057  | 13.996   |
| Level 2              | 10,11-Dihydro-10,11-dihydroxycarbamazepine                     | C15 H14 N2 O3      | 270.10057 | 11.962   |
| Level 2              | Nevirapine                                                     | C15 H14 N4 O       | 266.11728 | 11.996   |
| Level 2              | 3,5-di-tert-Butyl-4-hydroxybenzoic acid                        | C15 H22 O3         | 250.15681 | 18.611   |
| Level 2              | Alprenolol                                                     | C15 H23 N O2       | 249.17297 | 9.692    |
| Level 2              | N-Desmethyltramadol                                            | C15 H23 N O2       | 249.17293 | 10.607   |
| Level 2              | O-Desmethyl-cis-tramadol                                       | C15 H23 N O2       | 249.17283 | 8.008    |
| Level 2              | Sulpiride                                                      | C15 H23 N3 O4 S    | 341.14092 | 5.994    |
| Level 2              | Tiaprider                                                      | C15 H24 N2 O4 S    | 328.14564 | 6.704    |
| Level 2              | Metoprolol                                                     | C15 H25 N O3       | 267.18352 | 10.215   |
| Level 2              | Hexamethoxymethyl melamine                                     | C15 H30 N6 O6      | 390.22262 | 14.895   |
| Level 2              | PPG n5                                                         | C15 H32 O6         | 308.21995 | 14.057   |
| Level 2              | Pantoprazole                                                   | C16 H15 F2 N3 O4 S | 383.07536 | 14.541   |
| Level 2              | Sitagliptin                                                    | C16 H15 F6 N5 O    | 407.11845 | 10.533   |
| Level 2              | Clopidogrel                                                    | C16 H16 Cl N O2 S  | 321.05903 | 19.79    |
| Level 2              | Benzoyllecgonine                                               | C16 H19 N O4       | 289.13137 | 9.367    |
| Level 2              | Linezolid                                                      | C16 H20 F N3 O4    | 337.14374 | 11.399   |
| Level 2              | Tramadol                                                       | C16 H25 N O2       | 263.18846 | 10.035   |
| Level 2              | N-Desmethylvenlafaxine                                         | C16 H25 N O2       | 263.18862 | 12.41    |
| Level 2              | Ciprofloxacin                                                  | C17 H18 F N3 O3    | 331.13317 | 9.203    |
| Level 2              | Morphine                                                       | C17 H19 N O3       | 285.13667 | 4.61     |
| Level 2              | Flecainide                                                     | C17 H20 F6 N2 O3   | 414.13782 | 13.177   |
| Level 2              | Mycophenolic acid                                              | C17 H20 O6         | 320.12598 | 16.397   |
| Level 2              | Dextrorphan                                                    | C17 H23 N O        | 257.17811 | 9.895    |
| Level 2              | 2-(3,4-Dimethoxyphenyl)-5-methylamino-2-isopropylvaleronitrile | C17 H26 N2 O2      | 290.19957 | 12.522   |
| Level 2              | Venlafaxine                                                    | C17 H27 N O2       | 277.20435 | 12.31    |
| Level 2              | Amisulpride                                                    | C17 H27 N3 O4 S    | 369.1722  | 8.198    |
| Level 2              | Clozapine                                                      | C18 H19 Cl N4      | 326.1296  | 13.76    |
| Level 2              | 2-[4-(Diethylamino)-2-hydroxybenzoyl]benzoic acid              | C18 H19 N O4       | 313.13143 | 17.302   |
| Level 2              | Levofloxacin                                                   | C18 H20 F N3 O4    | 361.14362 | 8.747    |
| Level 2              | Codeine                                                        | C18 H21 N O3       | 299.15229 | 6.689    |
| Level 2              | Galaxolidone                                                   | C18 H24 O2         | 272.17755 | 20.304   |
| Level 2              | Bisoprolol                                                     | C18 H31 N O4       | 325.22541 | 12.249   |
| Level 2              | PPG n6                                                         | C18 H38 O7         | 366.26188 | 15.662   |
| Level 2              | Desmethylcitalopram                                            | C19 H19 F N2 O     | 310.14812 | 13.134   |
| Level 2              | Raltegravir                                                    | C20 H21 F N6 O5    | 444.15564 | 14.785   |



| Identification level | Name                                                     | Formula          | Calc. MW  | RT [min] |
|----------------------|----------------------------------------------------------|------------------|-----------|----------|
| Level 2              | 2-Ethylidene-1,5-dimethyl-3,3-diphenylpyrrolidine (EDDP) | C20 H23 N        | 277.18307 | 13.083   |
| Level 2              | Cetirizine                                               | C21 H25 Cl N2 O3 | 388.15544 | 16.461   |
| Level 2              | Methadone                                                | C21 H27 N O      | 309.20931 | 15.083   |
| Level 2              | Propafenone                                              | C21 H27 N O3     | 341.1992  | 14.977   |
| Level 2              | Losartan                                                 | C22 H23 Cl N6 O  | 422.16226 | 16.027   |
| Level 2              | Eprosartan                                               | C23 H24 N2 O4 S  | 424.14588 | 14.403   |
| Level 2              | Olmesartan                                               | C24 H26 N6 O3    | 446.20682 | 12.548   |
| Level 2              | Valsartan                                                | C24 H29 N5 O3    | 435.22744 | 17.163   |
| Level 2              | Ranolazine                                               | C24 H33 N3 O4    | 427.2472  | 12.752   |
| Level 2              | Irbesartan                                               | C25 H28 N6 O     | 428.23253 | 17.196   |
| Level 2              | Darunavir                                                | C27 H37 N3 O7 S  | 547.23528 | 15.776   |
| Level 2              | Melamine                                                 | C3 H6 N6         | 126.06533 | 1.225    |
| Level 2              | Fexofenadine                                             | C32 H39 N O4     | 501.28826 | 15.107   |
| Level 2              | Telmisartan                                              | C33 H30 N4 O2    | 514.23752 | 18.529   |
| Level 2              | Clarithromycin                                           | C38 H69 N O13    | 747.47719 | 16.543   |
| Level 2              | Tris(2-chloroethyl) phosphate                            | C6 H12 Cl3 O4 P  | 283.95406 | 13.895   |
| Level 2              | Benzotriazole                                            | C6 H5 N3         | 119.04838 | 8.53     |
| Level 2              | 4-Hydroxybenzotriazole                                   | C6 H5 N3 O       | 135.04333 | 6.088    |
| Level 2              | 1-Methyladenine                                          | C6 H7 N5         | 149.07026 | 5.471    |
| Level 2              | 2-Amino-6-methylmercaptapurine                           | C6 H7 N5 S       | 181.04236 | 7.597    |
| Level 2              | Metronidazole                                            | C6 H9 N3 O3      | 171.06458 | 6.037    |
| Level 2              | 2-Benzothiazolesulfonic acid                             | C7 H5 N O3 S2    | 214.97121 | 7.777    |
| Level 2              | Pregabalin                                               | C8 H17 N O2      | 159.12603 | 6.79     |
| Level 2              | Minoxidil                                                | C9 H15 N5 O      | 209.12783 | 9.496    |
| Level 2              | Gabapentin                                               | C9 H17 N O2      | 171.12601 | 6.789    |
| Level 2              | Pantothenate                                             | C9 H17 N O5      | 219.11065 | 5.525    |
| Level 2              | Pantothenate                                             | C9 H17 N O5      | 219.11065 | 5.697    |
| Level 2              | Tris(1-chloro-2-propyl)phosphate                         | C9 H18 Cl3 O4 P  | 326.00094 | 17.431   |
| Level 2              | CAPSO                                                    | C9 H19 N O4 S    | 237.1035  | 4.909    |
| Level 2              | Lamotrigine                                              | C9 H7 Cl2 N5     | 255.00784 | 10.375   |
| Level 2              | Quinoline                                                | C9 H7 N          | 129.05794 | 10.141   |
| Level 3              | 1-Phenyl-3-methyl-5-pyrazolone                           | C10 H10 N2 O     | 174.07935 | 6.217    |
| Level 3              | 4-Phenyl-3-buten-2-one                                   | C10 H10 O        | 146.07318 | 19.726   |
| Level 3              | 4-Phenylbutyric acid                                     | C10 H12 O2       | 164.0839  | 10.225   |
| Level 3              | 4-Phenylbutyric acid                                     | C10 H12 O2       | 164.0839  | 10.4     |
| Level 3              | NP-019992                                                | C10 H12 O4       | 196.07382 | 8.361    |
| Level 3              | NP-019992                                                | C10 H12 O4       | 196.07381 | 9.165    |
| Level 3              | 1-(3,4-dimethoxyphenyl)ethan-1-one oxime                 | C10 H13 N O3     | 195.08974 | 6.725    |
| Level 3              | trans-Zeatin                                             | C10 H13 N5 O     | 219.1122  | 2.128    |
| Level 3              | trans-Zeatin                                             | C10 H13 N5 O     | 219.1122  | 2.426    |
| Level 3              | trans-Zeatin                                             | C10 H13 N5 O     | 219.11131 | 2.441    |
| Level 3              | 2'-Deoxyadenosine                                        | C10 H13 N5 O3    | 251.10199 | 5.74     |
| Level 3              | 2'-Deoxyguanosine                                        | C10 H13 N5 O4    | 267.09659 | 4.784    |

| Identification level | Name                                                                                            | Formula       | Calc. MW  | RT [min] |
|----------------------|-------------------------------------------------------------------------------------------------|---------------|-----------|----------|
| Level 3              | 6-Pentyl-2H-pyran-2-one                                                                         | C10 H14 O2    | 166.09943 | 16.731   |
| Level 3              | 4-(1H-imidazol-1-yl)benzoic acid                                                                | C10 H8 N2 O2  | 188.05887 | 7.869    |
| Level 3              | 6-Methoxyquinoline                                                                              | C10 H9 N O    | 159.06844 | 12.959   |
| Level 3              | Methyl indole-3-acetate                                                                         | C11 H11 N O2  | 189.07933 | 11.607   |
| Level 3              | 4-methoxy-6-(prop-2-en-1-yl)-2H-1,3-benzodioxole                                                | C11 H12 O3    | 192.07893 | 10.596   |
| Level 3              | Sinapinic acid                                                                                  | C11 H12 O5    | 224.06839 | 10.739   |
| Level 3              | Indole-3-acrylic acid                                                                           | C11 H9 N O2   | 187.0635  | 6.103    |
| Level 3              | 3-ethyl-4-hydroxy-1-methyl-1,2-dihydroquinolin-2-one                                            | C12 H13 N O2  | 203.09503 | 8.907    |
| Level 3              | [3-({3-[(Cyclopropylmethyl)amino]-3-oxetanyl)methyl}-1,2-oxazol-5-yl]methanol                   | C12 H18 N2 O3 | 238.13162 | 6.044    |
| Level 3              | 6-Phenoxynicotinic acid                                                                         | C12 H9 N O3   | 215.05847 | 9.139    |
| Level 3              | 2,6-Di-tert-butyl-1,4-benzoquinone                                                              | C14 H20 O2    | 220.14662 | 17.619   |
| Level 3              | Isobornyl methacrylate                                                                          | C14 H22 O2    | 222.162   | 16.565   |
| Level 3              | 9-acridinecarboxylic acid hydrate                                                               | C14 H9 N O2   | 223.0634  | 5.536    |
| Level 3              | 2-Styryl-1,3-benzoxazole                                                                        | C15 H11 N O   | 221.084   | 12.071   |
| Level 3              | 2-Styryl-1,3-benzoxazole                                                                        | C15 H11 N O   | 221.0841  | 14.619   |
| Level 3              | 1,3-diphenyl-4,5-dihydro-1H-pyrazol-5-one                                                       | C15 H12 N2 O  | 236.09493 | 13.192   |
| Level 3              | 5-Hydroxy-7-(hydroxymethyl)-2-methyl-2-(5-oxotetrahydro-2-furanyl)-2,3-dihydro-4H-chromen-4-one | C15 H16 O6    | 292.09487 | 13.364   |
| Level 3              | Tebutam                                                                                         | C15 H23 N O   | 233.17842 | 10.477   |
| Level 3              | Alprenolol                                                                                      | C15 H23 N O2  | 249.17294 | 8.565    |
| Level 3              | 6-(7-methyloctyl)-1H,3H,4H,6H-furo[3,4-c]furan-1-one                                            | C15 H24 O3    | 252.17238 | 17.128   |
| Level 3              | 6-(7-methyloctyl)-1H,3H,4H,6H-furo[3,4-c]furan-1-one                                            | C15 H24 O3    | 252.17232 | 17.454   |
| Level 3              | (5E)-7-methylidene-10-oxo-4-(propan-2-yl)undec-5-enoic acid                                     | C15 H24 O3    | 252.17236 | 17.712   |
| Level 3              | 6-(7-methyloctyl)-1H,3H,4H,6H-furo[3,4-c]furan-1-one                                            | C15 H24 O3    | 252.17244 | 18.194   |
| Level 3              | 6-(7-methyloctyl)-1H,3H,4H,6H-furo[3,4-c]furan-1-one                                            | C15 H24 O3    | 252.17237 | 18.339   |
| Level 3              | 3-[4-methyl-1-(2-methylpropanoyl)-3-oxocyclohexyl]butanoic acid                                 | C15 H24 O4    | 268.16739 | 16.241   |
| Level 3              | Tramadol                                                                                        | C16 H25 N O2  | 263.18844 | 9.011    |
| Level 3              | (1R,2S,3R,4R)-3-[(Cyclopentylmethyl)amino]-4-phenyl-1,2-cyclopentanediol                        | C17 H25 N O2  | 275.18898 | 8.745    |
| Level 3              | Galaxolidone                                                                                    | C18 H24 O2    | 272.17758 | 20.079   |
| Level 3              | Galaxolidone                                                                                    | C18 H24 O2    | 272.17758 | 20.552   |
| Level 3              | Nalbuphine                                                                                      | C21 H27 N O4  | 357.19416 | 13.27    |
| Level 3              | 4,4'-bis(Diethylamino)benzophenone                                                              | C21 H28 N2 O  | 324.2203  | 13.087   |
| Level 3              | PPG n7                                                                                          | C21 H44 O8    | 441.33035 | 16.875   |
| Level 3              | PPG n8                                                                                          | C24 H50 O9    | 499.37237 | 17.865   |
| Level 3              | Trimethyl phosphate                                                                             | C3 H9 O4 P    | 140.02388 | 6.011    |

| Identification level | Name                                                         | Formula           | Calc. MW  | RT [min] |
|----------------------|--------------------------------------------------------------|-------------------|-----------|----------|
| Level 3              | PPG n11                                                      | C33 H68 O12       | 673.4979  | 19.973   |
| Level 3              | 4-Piperidone                                                 | C5 H9 N O         | 99.06841  | 4.677    |
| Level 3              | Diglyme                                                      | C6 H14 O3         | 134.09434 | 4.961    |
| Level 3              | Diglyme                                                      | C6 H14 O3         | 134.09433 | 5.806    |
| Level 3              | Diglyme                                                      | C6 H14 O3         | 134.09431 | 6.106    |
| Level 3              | Dipropylene glycol                                           | C6 H14 O3         | 134.09434 | 6.279    |
| Level 3              | 7-Methylxanthine                                             | C6 H6 N4 O2       | 166.04907 | 2.411    |
| Level 3              | 3-Hydroxy-2-methylpyridine                                   | C6 H7 N O         | 109.05287 | 2.089    |
| Level 3              | 3-Hydroxy-2-methylpyridine                                   | C6 H7 N O         | 109.05287 | 3.002    |
| Level 3              | 7-Methylguanine                                              | C6 H7 N5 O        | 165.06509 | 5.215    |
| Level 3              | 7-Methylguanine                                              | C6 H7 N5 O        | 165.06516 | 6.146    |
| Level 3              | 1,3-Phenylenediamine                                         | C6 H8 N2          | 108.06873 | 1.895    |
| Level 3              | 2-Hydroxysimazine                                            | C7 H13 N5 O       | 183.11194 | 2.415    |
| Level 3              | Mesalamine                                                   | C7 H7 N O3        | 153.04263 | 2.991    |
| Level 3              | Paraxanthine                                                 | C7 H8 N4 O2       | 180.06485 | 6.542    |
| Level 3              | 2-Anisidine                                                  | C7 H9 N O         | 123.06844 | 5.185    |
| Level 3              | 2-Anisidine                                                  | C7 H9 N O         | 123.06846 | 5.637    |
| Level 3              | 3-Hydroxy-5-(hydroxymethyl)-2-methylisonicotinaldehyde oxime | C8 H10 N2 O3      | 182.06925 | 5.29     |
| Level 3              | 2-Methoxy-5-methylaniline                                    | C8 H11 N O        | 137.08419 | 12.662   |
| Level 3              | NP-019722                                                    | C8 H13 N O4       | 187.0845  | 2.152    |
| Level 3              | Tropine                                                      | C8 H15 N O        | 141.11544 | 12.83    |
| Level 3              | 3,3,5,5-Tetramethylpyrrolidine-N-oxide                       | C8 H15 N O        | 141.11549 | 13.216   |
| Level 3              | NP-018661                                                    | C8 H16 O3         | 160.10995 | 8.446    |
| Level 3              | 3-(2,6-Dioxocyclohexyl)propanenitrile                        | C9 H11 N O2       | 165.07894 | 2.58     |
| Level 3              | 2-Hydroxyphenylalanine                                       | C9 H11 N O3       | 181.07436 | 6.899    |
| Level 3              | N-Benzylethanolamine                                         | C9 H13 N O        | 151.0998  | 6.067    |
| Level 3              | 2,2,6,6-Tetramethyl-4 piperidone                             | C9 H17 N O        | 155.13109 | 2.895    |
| Level 3              | 4-Indolecarbaldehyde                                         | C9 H7 N O         | 145.05295 | 10.766   |
| Level 3              | 3-Methyl-2-quinoxalinol                                      | C9 H8 N2 O        | 160.06379 | 6.652    |
| Level 3              | 2-methyl-1H-benzimidazole-5-carboxylic acid                  | C9 H8 N2 O2       | 176.05861 | 3.414    |
| Level 3              | 2-methyl-1H-benzimidazole-5-carboxylic acid                  | C9 H8 N2 O2       | 176.05866 | 5.028    |
| Level 3              | indoline-2-carboxylic acid                                   | C9 H9 N O2        | 163.06341 | 7.763    |
| Level 4              | MFCD00209704                                                 | [13]C3 H3 N3 O3   | 132.02729 | 0.947    |
| Level 4              | 4-Chloro-1,3-(~13-C_6_)benzenediol                           | [13]C6 H5 Cl O2   | 150.01825 | 0.941    |
| Level 4              | Sodium bromate                                               | Br Na O3          | 149.89277 | 1.103    |
| Level 4              |                                                              | C H Cl F2 N6 O3   | 217.9762  | 0.924    |
| Level 4              |                                                              | C H Cl F5 P S     | 205.91435 | 0.944    |
| Level 4              |                                                              | C H Cl N6 S3      | 227.91166 | 0.959    |
| Level 4              |                                                              | C H Cl2 N6 O P S4 | 341.82073 | 0.984    |
| Level 4              |                                                              | C H F N O3 P3 S3  | 282.83218 | 1.128    |
| Level 4              |                                                              | C H F N4 P2 S2    | 213.91005 | 0.896    |
| Level 4              |                                                              | C H F O10 P2      | 253.90247 | 1.092    |

| Identification<br>level | Name | Formula               | Calc. MW  | RT [min] |
|-------------------------|------|-----------------------|-----------|----------|
| Level 4                 |      | C H F S4              | 159.89408 | 1.064    |
| Level 4                 |      | C H F12 P3 S4         | 461.79793 | 0.963    |
| Level 4                 |      | C H F14 O2 P3 S4      | 531.78478 | 1.169    |
| Level 4                 |      | C H F14 O7 P3 S3      | 579.78746 | 1.096    |
| Level 4                 |      | C H F2 N2 O17 P3 S2   | 507.78993 | 1.077    |
| Level 4                 |      | C H F2 N8 O10 P3 S2   | 479.84297 | 1.189    |
| Level 4                 |      | C H F2 O P S4         | 225.86192 | 1.121    |
| Level 4                 |      | C H F3 N3 P S3        | 238.90232 | 1.097    |
| Level 4                 |      | C H F3 O3 P2 S        | 211.90764 | 1.077    |
| Level 4                 |      | C H F4 N O10 S4       | 390.84183 | 1.034    |
| Level 4                 |      | C H F5 N O2 P S2      | 248.91075 | 0.953    |
| Level 4                 |      | C H F5 N O2 P S2      | 248.9106  | 1.249    |
| Level 4                 |      | C H F5 N P3 S         | 246.89613 | 1.028    |
| Level 4                 |      | C H F5 O14 P2 S3      | 489.79244 | 0.904    |
| Level 4                 |      | C H F6 N S3           | 236.91723 | 1.033    |
| Level 4                 |      | C H F6 N2 O P S3      | 297.88951 | 1.121    |
| Level 4                 |      | C H F6 N3 O3          | 216.9922  | 0.879    |
| Level 4                 |      | C H F6 N3 O3 P2 S3    | 374.85591 | 1.037    |
| Level 4                 |      | C H F6 O6 P3 S3       | 411.80527 | 0.998    |
| Level 4                 |      | C H F6 O9 P3 S3       | 459.78963 | 1.038    |
| Level 4                 |      | C H F7 N3 O9 P3 S     | 456.85371 | 1.053    |
| Level 4                 |      | C H F7 O13 P2 S3      | 511.79454 | 1.178    |
| Level 4                 |      | C H F7 O4 S4          | 337.86432 | 1.069    |
| Level 4                 |      | C H F8 N2 O6 P3 S2    | 445.83611 | 1.035    |
| Level 4                 |      | C H F8 N4 P3 S        | 345.90074 | 1.21     |
| Level 4                 |      | C H F9 N2 O4 P2 S2    | 401.87079 | 1.108    |
| Level 4                 |      | C H N2 O P            | 87.98284  | 0.95     |
| Level 4                 |      | C H N2 O5 P3          | 213.90991 | 1.052    |
| Level 4                 |      | C H N4 O17 P3 S3      | 529.77084 | 1.035    |
| Level 4                 |      | C H N4 P S2           | 163.93764 | 1.076    |
| Level 4                 |      | C H2 Br Cl F5 O2 P S2 | 349.8028  | 0.942    |
| Level 4                 |      | C H2 Br F3 N O7 P3    | 368.81923 | 1.053    |
| Level 4                 |      | C H2 Br N3 O5 S4      | 342.80547 | 1.119    |
| Level 4                 |      | C H2 Ca O3            | 101.96285 | 0.951    |
| Level 4                 |      | C H2 Cl F N2 O3       | 143.9735  | 1.021    |
| Level 4                 |      | C H2 Cl F12 N2 O P3   | 413.88839 | 1.204    |
| Level 4                 |      | C H2 Cl F3 O3 P2 S    | 247.88415 | 0.951    |
| Level 4                 |      | C H2 Cl F5 N5 O P S5  | 420.8214  | 1.084    |
| Level 4                 |      | C H2 Cl N2 P S3       | 203.88125 | 0.945    |
| Level 4                 |      | C H2 Cl2 F N P2 S3    | 274.81811 | 1.079    |
| Level 4                 |      | C H2 Cl2 F N P2 S3    | 274.81835 | 1.162    |
| Level 4                 |      | C H2 Cl2 F2 N6 O      | 221.963   | 0.941    |
| Level 4                 |      | C H2 Cl2 F9 N3 O9 P2  | 502.84962 | 1.052    |
| Level 4                 |      | C H2 Cl2 N2 O3 P2     | 221.89184 | 0.944    |

| Identification<br>level | Name | Formula              | Calc. MW  | RT [min] |
|-------------------------|------|----------------------|-----------|----------|
| Level 4                 |      | C H2 F N O3 S2       | 158.94574 | 1.047    |
| Level 4                 |      | C H2 F N O4 P2 S4    | 300.83247 | 1.092    |
| Level 4                 |      | C H2 F N2 O11 P3 S2  | 393.83003 | 1.152    |
| Level 4                 |      | C H2 F N2 O2 P3 S3   | 281.84734 | 1.217    |
| Level 4                 |      | C H2 F N2 O3 P3 S2   | 265.8702  | 1.236    |
| Level 4                 |      | C H2 F N5 S          | 135.00181 | 0.957    |
| Level 4                 |      | C H2 F N6 O18 P3 S2  | 561.80686 | 0.868    |
| Level 4                 |      | C H2 F N6 P3 S2      | 273.89799 | 0.882    |
| Level 4                 |      | C H2 F N8 O17 P3 S3  | 605.78968 | 1.035    |
| Level 4                 |      | C H2 F O5 P S2       | 207.90633 | 1.091    |
| Level 4                 |      | C H2 F O6 P S3       | 255.87369 | 1.058    |
| Level 4                 |      | C H2 F2 N4 P2 S2     | 233.91706 | 0.962    |
| Level 4                 |      | C H2 F3 N O5 P2 S    | 258.90814 | 1.05     |
| Level 4                 |      | C H2 F3 N3 P2 S2     | 238.91184 | 0.996    |
| Level 4                 |      | C H2 F3 O3 P3 S      | 243.88907 | 0.95     |
| Level 4                 |      | C H2 F4 N2 O15 P2 S3 | 515.80333 | 0.868    |
| Level 4                 |      | C H2 F5 N6 P S5      | 383.86051 | 1.091    |
| Level 4                 |      | C H2 F5 O13 P3       | 409.86392 | 1.179    |
| Level 4                 |      | C H2 F6 N O5 P3 S2   | 378.84908 | 1.051    |
| Level 4                 |      | C H2 F6 N2 O3        | 203.99706 | 0.859    |
| Level 4                 |      | C H2 F6 N7 O2 P3 S3  | 446.85559 | 1.045    |
| Level 4                 |      | C H2 N O P S         | 106.95944 | 1.025    |
| Level 4                 |      | C H2 N3 O2 P         | 118.98879 | 0.921    |
| Level 4                 |      | C H2 N3 O4 P         | 150.97807 | 29.489   |
| Level 4                 |      | C H2 N4 O4 S2        | 197.95197 | 0.927    |
| Level 4                 |      | C H2 N4 O8 P2 S3     | 355.85137 | 1.089    |
| Level 4                 |      | C H2 N4 O9 S2        | 277.92644 | 1.091    |
| Level 4                 |      | C H2 N6 S4           | 225.92197 | 0.983    |
| Level 4                 |      | C H3 Br Cl O P S     | 207.85144 | 1.122    |
| Level 4                 |      | C H3 Cl F3 N8 O P S5 | 425.84149 | 1.092    |
| Level 4                 |      | C H3 Cl F6 N2 S5     | 351.84929 | 0.928    |
| Level 4                 |      | C H3 Cl2 F S2        | 167.90336 | 1.11     |
| Level 4                 |      | C H3 Cl2 N O4 S2     | 226.88847 | 1.029    |
| Level 4                 |      | C H3 Cl3 F N3 O2 S   | 244.89904 | 1.067    |
| Level 4                 |      | C H3 F N4 S          | 122.00644 | 0.949    |
| Level 4                 |      | C H3 F2 N2 O12 P S3  | 399.85494 | 1.12     |
| Level 4                 |      | C H3 F2 N2 O13 P3 S3 | 477.79769 | 1.126    |
| Level 4                 |      | C H3 F2 N6 O7 P S3   | 375.8931  | 1.083    |
| Level 4                 |      | C H3 F2 O17 P S      | 387.87969 | 1.094    |
| Level 4                 |      | C H3 F2 P3 S3        | 241.85747 | 1.045    |
| Level 4                 |      | C H3 F3 N2 O7 P2 S4  | 401.82621 | 1.056    |
| Level 4                 |      | C H3 F4 O14 P3 S2    | 471.81133 | 1.234    |
| Level 4                 |      | C H3 N O3 S          | 108.98355 | 0.969    |
| Level 4                 |      | C H3 N2 O P S        | 121.97004 | 0.965    |

| Identification<br>level | Name | Formula               | Calc. MW  | RT [min] |
|-------------------------|------|-----------------------|-----------|----------|
| Level 4                 |      | C H3 N2 O12 P3        | 327.89008 | 1.059    |
| Level 4                 |      | C H3 N2 O2 P          | 105.99343 | 0.951    |
| Level 4                 |      | C H3 N6 P S4          | 257.90365 | 1.06     |
| Level 4                 |      | C10 H Cl3 F O P       | 291.88128 | 12.571   |
| Level 4                 |      | C10 H F13 N7 O13 P3 S | 798.83586 | 3.711    |
| Level 4                 |      | C10 H O2 P S2         | 247.91554 | 1.065    |
| Level 4                 |      | C10 H10 Cl6 N2 O2 S4  | 527.77471 | 1.157    |
| Level 4                 |      | C10 H10 F N3 O5       | 271.05956 | 5.829    |
| Level 4                 |      | C10 H10 N2 O3         | 206.06927 | 3.832    |
| Level 4                 |      | C10 H10 N2 O3         | 206.06925 | 11.732   |
| Level 4                 |      | C10 H10 N6 O2         | 246.08714 | 12.722   |
| Level 4                 |      | C10 H10 O3            | 178.06305 | 10.737   |
| Level 4                 |      | C10 H10 O4            | 194.05818 | 10.893   |
| Level 4                 |      | C10 H11 N O2          | 159.06857 | 8.383    |
| Level 4                 |      | C10 H11 N O2          | 177.07892 | 8.625    |
| Level 4                 |      | C10 H11 N O2          | 177.07915 | 11.463   |
| Level 4                 |      | C10 H11 N O3          | 193.07412 | 8.072    |
| Level 4                 |      | C10 H11 N O4          | 209.06908 | 6.606    |
| Level 4                 |      | C10 H11 N O4          | 209.06898 | 7.709    |
| Level 4                 |      | C10 H11 N2 O3 P       | 238.05126 | 17.104   |
| Level 4                 |      | C10 H11 N3 O3         | 221.08032 | 6.879    |
| Level 4                 |      | C10 H11 N5 O3         | 249.08605 | 5.368    |
| Level 4                 |      | C10 H12 Cl N5 O2      | 269.06802 | 8.959    |
| Level 4                 |      | C10 H12 F3 N O2 S     | 267.05426 | 11.049   |
| Level 4                 |      | C10 H12 N2 O          | 176.09499 | 8.303    |
| Level 4                 |      | C10 H12 N2 O2         | 192.08999 | 4.636    |
| Level 4                 |      | C10 H12 N2 O2         | 192.09006 | 5.802    |
| Level 4                 |      | C10 H12 N2 O2         | 192.08994 | 6.222    |
| Level 4                 |      | C10 H12 N2 O2         | 192.09007 | 6.307    |
| Level 4                 |      | C10 H12 N2 O2         | 192.09006 | 7.056    |
| Level 4                 |      | C10 H12 N2 O2         | 192.09004 | 7.221    |
| Level 4                 |      | C10 H12 N2 O3         | 208.0851  | 5.915    |
| Level 4                 |      | C10 H12 N4 O4         | 252.08613 | 8.195    |
| Level 4                 |      | C10 H12 O             | 148.08885 | 8.072    |
| Level 4                 |      | C10 H12 O4            | 196.07112 | 9.795    |
| Level 4                 |      | C10 H13 Cl N2 O       | 212.0698  | 4.41     |
| Level 4                 |      | C10 H13 Cl3 N6 O6     | 417.99662 | 9.132    |
| Level 4                 |      | C10 H13 F2 N5 O3      | 289.09831 | 12.197   |
| Level 4                 |      | C10 H13 N O2          | 179.09474 | 4.363    |
| Level 4                 |      | C10 H13 N O2          | 179.09479 | 6.076    |
| Level 4                 |      | C10 H13 N O2          | 179.09479 | 9.505    |
| Level 4                 |      | C10 H13 N O3          | 217.07374 | 1.907    |
| Level 4                 |      | C10 H13 N O3          | 195.08976 | 5.716    |
| Level 4                 |      | C10 H13 N O3          | 195.08976 | 6.87     |

| Identification<br>level | Name | Formula           | Calc. MW  | RT [min] |
|-------------------------|------|-------------------|-----------|----------|
| Level 4                 |      | C10 H13 N O3      | 195.08983 | 6.986    |
| Level 4                 |      | C10 H13 N O3      | 177.0791  | 9.978    |
| Level 4                 |      | C10 H13 N O3      | 195.08985 | 10.476   |
| Level 4                 |      | C10 H13 N O3      | 195.08973 | 10.922   |
| Level 4                 |      | C10 H13 N O3 S    | 227.06163 | 7.318    |
| Level 4                 |      | C10 H13 N3 O3     | 223.09589 | 7.112    |
| Level 4                 |      | C10 H13 N5 O2     | 235.10683 | 3.987    |
| Level 4                 |      | C10 H13 N5 O3     | 251.10177 | 5.616    |
| Level 4                 |      | C10 H13 N8 O2 P S | 340.06076 | 11.694   |
| Level 4                 |      | C10 H14 F2 O3 S   | 252.06351 | 11.128   |
| Level 4                 |      | C10 H14 N2        | 162.11579 | 6.864    |
| Level 4                 |      | C10 H14 N2 O      | 178.11075 | 4.624    |
| Level 4                 |      | C10 H14 N2 O      | 178.11072 | 9.55     |
| Level 4                 |      | C10 H14 N2 O2     | 194.10568 | 5.232    |
| Level 4                 |      | C10 H14 N2 O2     | 194.10593 | 10.752   |
| Level 4                 |      | C10 H14 N2 O2     | 194.10591 | 11.637   |
| Level 4                 |      | C10 H14 N2 O3     | 210.10052 | 5.72     |
| Level 4                 |      | C10 H14 O3        | 164.0838  | 11.84    |
| Level 4                 |      | C10 H14 O3        | 164.08387 | 11.944   |
| Level 4                 |      | C10 H15 F         | 154.1155  | 1.096    |
| Level 4                 |      | C10 H15 F         | 154.11543 | 1.417    |
| Level 4                 |      | C10 H15 F N3 O4 P | 291.07787 | 8.487    |
| Level 4                 |      | C10 H15 F2 N S    | 219.08961 | 5.221    |
| Level 4                 |      | C10 H15 F3 N6 O2  | 308.12087 | 10.876   |
| Level 4                 |      | C10 H15 F3 O2     | 224.10266 | 12.335   |
| Level 4                 |      | C10 H15 N O       | 165.11547 | 6.692    |
| Level 4                 |      | C10 H15 N O       | 165.11559 | 15.975   |
| Level 4                 |      | C10 H15 N O2      | 181.11039 | 16.837   |
| Level 4                 |      | C10 H15 N O2      | 181.11036 | 18.053   |
| Level 4                 |      | C10 H15 N O3      | 197.10542 | 5.931    |
| Level 4                 |      | C10 H15 N O4      | 213.10024 | 6.331    |
| Level 4                 |      | C10 H15 N3 O3 S   | 257.08333 | 5.13     |
| Level 4                 |      | C10 H15 N5 O3     | 253.11739 | 5.257    |
| Level 4                 |      | C10 H16 F3 N7     | 291.14183 | 6.133    |
| Level 4                 |      | C10 H16 N2 O S2   | 244.0711  | 8.423    |
| Level 4                 |      | C10 H16 N2 O2     | 196.12134 | 3.83     |
| Level 4                 |      | C10 H16 N2 O2     | 196.12133 | 6.311    |
| Level 4                 |      | C10 H16 N2 O3     | 212.1163  | 6.932    |
| Level 4                 |      | C10 H16 N2 O3 S   | 244.08799 | 1.736    |
| Level 4                 |      | C10 H16 N2 O3 S   | 244.08809 | 4.474    |
| Level 4                 |      | C10 H16 N2 O4     | 228.11132 | 9.537    |
| Level 4                 |      | C10 H16 N2 O4 S   | 260.08364 | 2.067    |
| Level 4                 |      | C10 H16 N2 O4 S   | 260.08295 | 4.965    |
| Level 4                 |      | C10 H16 N2 P2     | 226.07877 | 1.375    |

| Identification<br>level | Name | Formula              | Calc. MW  | RT [min] |
|-------------------------|------|----------------------|-----------|----------|
| Level 4                 |      | C10 H16 N6 O2        | 252.13406 | 13.479   |
| Level 4                 |      | C10 H16 O4           | 200.10522 | 8.047    |
| Level 4                 |      | C10 H16 O7           | 248.08968 | 10.295   |
| Level 4                 |      | C10 H17 F N3 P S     | 261.08636 | 9.25     |
| Level 4                 |      | C10 H17 F3 O3        | 242.11296 | 10.85    |
| Level 4                 |      | C10 H17 F4 N5 O      | 299.13679 | 12.562   |
| Level 4                 |      | C10 H17 N            | 134.10963 | 9.302    |
| Level 4                 |      | C10 H17 N O          | 167.13105 | 13.842   |
| Level 4                 |      | C10 H17 N O2         | 183.12601 | 8.891    |
| Level 4                 |      | C10 H17 N O4         | 215.11613 | 2.094    |
| Level 4                 |      | C10 H17 N O8 S2      | 343.03941 | 4.721    |
| Level 4                 |      | C10 H17 N3 O3        | 227.12679 | 1.382    |
| Level 4                 |      | C10 H17 N3 O5        | 259.11657 | 1.862    |
| Level 4                 |      | C10 H18 Cl3 O10 P    | 433.9706  | 9.131    |
| Level 4                 |      | C10 H18 F N2 O3 P    | 264.10426 | 1.592    |
| Level 4                 |      | C10 H18 F N4 P S2    | 308.06958 | 13.712   |
| Level 4                 |      | C10 H18 F2 O S       | 224.10505 | 18.611   |
| Level 4                 |      | C10 H18 F3 N O2 S    | 273.10039 | 8.817    |
| Level 4                 |      | C10 H18 F3 N2 O2 P S | 318.0785  | 11.694   |
| Level 4                 |      | C10 H18 F3 N5 O      | 281.14601 | 3.908    |
| Level 4                 |      | C10 H18 N2           | 166.14699 | 8.616    |
| Level 4                 |      | C10 H18 N2 O         | 182.1421  | 11.289   |
| Level 4                 |      | C10 H18 N2 O4        | 230.1268  | 1.04     |
| Level 4                 |      | C10 H18 N2 O4        | 230.12677 | 1.075    |
| Level 4                 |      | C10 H18 N2 O4        | 230.1268  | 1.119    |
| Level 4                 |      | C10 H18 N2 O5 P2     | 308.06959 | 12.434   |
| Level 4                 |      | C10 H18 N6 O2        | 254.14914 | 1.044    |
| Level 4                 |      | C10 H18 N6 O3        | 270.14402 | 11.499   |
| Level 4                 |      | C10 H18 O            | 154.13579 | 15.483   |
| Level 4                 |      | C10 H18 O2 S         | 202.10289 | 11.016   |
| Level 4                 |      | C10 H18 O5           | 218.11523 | 7.601    |
| Level 4                 |      | C10 H18 O6           | 234.1103  | 7.432    |
| Level 4                 |      | C10 H19 Br4 O4 P     | 549.77501 | 1.01     |
| Level 4                 |      | C10 H19 F2 N3 O S    | 267.12178 | 7.942    |
| Level 4                 |      | C10 H19 F2 O2 P S    | 272.08121 | 15.389   |
| Level 4                 |      | C10 H19 N O          | 169.14662 | 6.607    |
| Level 4                 |      | C10 H19 N O          | 169.14673 | 7.515    |
| Level 4                 |      | C10 H19 N O2         | 185.14163 | 7.752    |
| Level 4                 |      | C10 H19 N O3         | 201.1365  | 5.187    |
| Level 4                 |      | C10 H19 N O4         | 217.13152 | 5.918    |
| Level 4                 |      | C10 H19 N O5         | 233.12649 | 7.049    |
| Level 4                 |      | C10 H19 N3 O2        | 235.13229 | 14.326   |
| Level 4                 |      | C10 H19 N3 O2        | 235.1324  | 14.714   |
| Level 4                 |      | C10 H19 N9 S         | 297.14787 | 13.199   |



| Identification<br>level | Name | Formula                  | Calc. MW  | RT [min] |
|-------------------------|------|--------------------------|-----------|----------|
| Level 4                 |      | C10 H19 O3 P S           | 250.0792  | 8.458    |
| Level 4                 |      | C10 H19 O3 P S           | 250.07919 | 9.103    |
| Level 4                 |      | C10 H2 Br Cl2 N4 O7 P3 S | 563.74175 | 1.045    |
| Level 4                 |      | C10 H2 F O7 P3 S         | 377.87196 | 0.954    |
| Level 4                 |      | C10 H2 N O2 P S2         | 262.92645 | 0.967    |
| Level 4                 |      | C10 H20 F2 N6 O S        | 310.13953 | 9.137    |
| Level 4                 |      | C10 H20 F5 N P2 S2       | 375.04461 | 9.802    |
| Level 4                 |      | C10 H20 N2 O4            | 232.14229 | 1.058    |
| Level 4                 |      | C10 H20 N6 O3            | 272.16005 | 12.118   |
| Level 4                 |      | C10 H20 O3               | 188.14121 | 14.963   |
| Level 4                 |      | C10 H20 O4               | 204.13629 | 10.658   |
| Level 4                 |      | C10 H20 O4               | 204.13631 | 10.829   |
| Level 4                 |      | C10 H20 O5               | 220.13121 | 10.635   |
| Level 4                 |      | C10 H20 O5               | 220.13121 | 11.325   |
| Level 4                 |      | C10 H20 O6               | 236.12604 | 5.873    |
| Level 4                 |      | C10 H21 F3 O S           | 246.12631 | 16.715   |
| Level 4                 |      | C10 H21 F5 N2 O2 S       | 328.12408 | 14.534   |
| Level 4                 |      | C10 H21 F5 O S           | 284.12334 | 12.567   |
| Level 4                 |      | C10 H21 N O S2           | 235.10678 | 2.222    |
| Level 4                 |      | C10 H21 N O2             | 187.15731 | 4.97     |
| Level 4                 |      | C10 H21 N O2             | 187.1575  | 12.529   |
| Level 4                 |      | C10 H21 N O4             | 219.14698 | 2.112    |
| Level 4                 |      | C10 H21 N O4             | 219.147   | 2.475    |
| Level 4                 |      | C10 H21 N O5             | 235.1419  | 3.299    |
| Level 4                 |      | C10 H21 N O5             | 235.14194 | 10.029   |
| Level 4                 |      | C10 H21 N O6             | 251.13697 | 1.904    |
| Level 4                 |      | C10 H22 N2 O3            | 218.163   | 1.082    |
| Level 4                 |      | C10 H22 P2 S             | 236.09101 | 5.904    |
| Level 4                 |      | C10 H23 N O4             | 221.1626  | 8.144    |
| Level 4                 |      | C10 H23 N O4             | 221.16268 | 8.27     |
| Level 4                 |      | C10 H23 N O4             | 221.16291 | 10.801   |
| Level 4                 |      | C10 H23 N O5             | 237.15747 | 8.726    |
| Level 4                 |      | C10 H23 N O5             | 237.1575  | 9.104    |
| Level 4                 |      | C10 H24 F2 O2 S          | 246.14635 | 11.698   |
| Level 4                 |      | C10 H24 N2 O2            | 204.18378 | 1.271    |
| Level 4                 |      | C10 H24 N2 O3            | 220.17863 | 1.099    |
| Level 4                 |      | C10 H25 F2 N O S         | 245.16294 | 8.046    |
| Level 4                 |      | C10 H25 F2 N O S         | 245.16265 | 8.318    |
| Level 4                 |      | C10 H25 F2 N O5 S        | 309.1421  | 1.972    |
| Level 4                 |      | C10 H25 F2 N3 O S        | 273.16849 | 1.573    |
| Level 4                 |      | C10 H25 F4 N O2 P2       | 329.12983 | 12.691   |
| Level 4                 |      | C10 H25 F5 O3            | 288.17258 | 19.021   |
| Level 4                 |      | C10 H25 F6 N2 O P        | 334.16036 | 7.552    |
| Level 4                 |      | C10 H26 Cl F2 N10 O3 P   | 438.15712 | 14.969   |

| Identification<br>level | Name | Formula              | Calc. MW  | RT [min] |
|-------------------------|------|----------------------|-----------|----------|
| Level 4                 |      | C10 H26 Cl F3 N O P  | 299.14006 | 8.999    |
| Level 4                 |      | C10 H26 F P S3       | 292.09242 | 10.675   |
| Level 4                 |      | C10 H26 F2 O2 S      | 248.16216 | 11.054   |
| Level 4                 |      | C10 H26 F2 O2 S      | 248.16232 | 14.391   |
| Level 4                 |      | C10 H26 F3 N2 P S    | 294.15056 | 1.122    |
| Level 4                 |      | C10 H26 N2 O S3      | 286.12111 | 15.824   |
| Level 4                 |      | C10 H27 F N10 S      | 338.2133  | 12.727   |
| Level 4                 |      | C10 H27 F O10        | 326.15773 | 7.016    |
| Level 4                 |      | C10 H27 F2 N O2 S    | 263.17321 | 10.211   |
| Level 4                 |      | C10 H27 F2 N O4 S    | 295.16327 | 10.234   |
| Level 4                 |      | C10 H27 F2 N O4 S    | 295.16318 | 11.146   |
| Level 4                 |      | C10 H27 F2 N O4 S2   | 327.13543 | 14.46    |
| Level 4                 |      | C10 H27 F3 N10 O7 S2 | 520.14625 | 22.135   |
| Level 4                 |      | C10 H27 F3 N3 O2 P   | 309.17874 | 6.183    |
| Level 4                 |      | C10 H27 F3 O3 P2     | 314.13811 | 11.963   |
| Level 4                 |      | C10 H27 F4 N4 O3 P   | 358.17568 | 15.504   |
| Level 4                 |      | C10 H27 O6 P         | 274.15437 | 18.88    |
| Level 4                 |      | C10 H28 F3 O5 P      | 316.1633  | 12.439   |
| Level 4                 |      | C10 H28 F4 O7        | 336.1781  | 13.261   |
| Level 4                 |      | C10 H28 F8 N6 O15 S  | 656.12053 | 22.139   |
| Level 4                 |      | C10 H28 O S2         | 228.15845 | 8.241    |
| Level 4                 |      | C10 H29 N4 O2 P      | 268.20369 | 18.507   |
| Level 4                 |      | C10 H29 O7 P         | 292.16499 | 16.882   |
| Level 4                 |      | C10 H30 F N O3 P2    | 293.16844 | 17.121   |
| Level 4                 |      | C10 H30 F3 N O S     | 269.19924 | 17.707   |
| Level 4                 |      | C10 H30 N2 O3 P2     | 288.17235 | 17.802   |
| Level 4                 |      | C10 H31 N3 O4 S      | 289.20416 | 19.96    |
| Level 4                 |      | C10 H32 F6 O3 S      | 346.1965  | 13.189   |
| Level 4                 |      | C10 H32 N9 O P       | 325.24657 | 15.093   |
| Level 4                 |      | C10 H33 F N2 O11     | 376.20688 | 13.4     |
| Level 4                 |      | C10 H33 F4 N O S2    | 323.19447 | 14.406   |
| Level 4                 |      | C10 H33 F5 N O2 P3   | 387.16442 | 5.161    |
| Level 4                 |      | C10 H34 Cl F N9 P    | 365.23371 | 19.9     |
| Level 4                 |      | C10 H35 F N2 O2 S4   | 362.15584 | 7.364    |
| Level 4                 |      | C10 H4 Cl2 O2        | 225.95821 | 0.944    |
| Level 4                 |      | C10 H4 N O3 P S2     | 280.93696 | 0.963    |
| Level 4                 |      | C10 H5 F N2 O8 P2 S  | 393.92256 | 1.048    |
| Level 4                 |      | C10 H6 N O4 P S2     | 298.94734 | 0.992    |
| Level 4                 |      | C10 H7 F2 N3 O2      | 239.05086 | 9.059    |
| Level 4                 |      | C10 H7 N O2          | 173.04783 | 8.345    |
| Level 4                 |      | C10 H8 N2 O          | 172.06391 | 8.451    |
| Level 4                 |      | C10 H8 N2 O          | 172.06379 | 8.671    |
| Level 4                 |      | C10 H8 O3            | 176.04733 | 8.451    |
| Level 4                 |      | C10 H9 F3 O2         | 218.05557 | 8.317    |

| Identification<br>level | Name | Formula           | Calc. MW  | RT [min] |
|-------------------------|------|-------------------|-----------|----------|
| Level 4                 |      | C10 H9 N O        | 159.06858 | 11.274   |
| Level 4                 |      | C10 H9 N O2       | 175.0635  | 9.525    |
| Level 4                 |      | C10 H9 N O2       | 175.06364 | 10.594   |
| Level 4                 |      | C10 H9 N O2       | 175.06357 | 11.606   |
| Level 4                 |      | C11 H10 N2 O2     | 202.07453 | 4.024    |
| Level 4                 |      | C11 H10 N2 O2     | 202.0743  | 10.578   |
| Level 4                 |      | C11 H10 N4 O      | 214.08166 | 7.004    |
| Level 4                 |      | C11 H10 O2        | 174.06808 | 13.598   |
| Level 4                 |      | C11 H11 N O       | 173.0843  | 5.798    |
| Level 4                 |      | C11 H11 N O2      | 189.07897 | 4.932    |
| Level 4                 |      | C11 H11 N3 O2     | 217.08517 | 3.943    |
| Level 4                 |      | C11 H11 N3 O2     | 217.08523 | 4.806    |
| Level 4                 |      | C11 H11 N5 O2     | 267.07573 | 13.362   |
| Level 4                 |      | C11 H12 F2 O2 S   | 246.05274 | 12.495   |
| Level 4                 |      | C11 H12 N2 O      | 188.09511 | 7.752    |
| Level 4                 |      | C11 H12 N2 O2     | 204.09014 | 5.904    |
| Level 4                 |      | C11 H12 N2 O2     | 226.07436 | 8.935    |
| Level 4                 |      | C11 H12 N2 O2     | 226.07425 | 9.895    |
| Level 4                 |      | C11 H12 O         | 160.08899 | 6.329    |
| Level 4                 |      | C11 H13 F N2 O3   | 240.09    | 10.225   |
| Level 4                 |      | C11 H13 F N2 O5   | 272.08115 | 14.19    |
| Level 4                 |      | C11 H13 F N2 O5   | 272.08116 | 14.862   |
| Level 4                 |      | C11 H13 N O       | 175.09999 | 12.733   |
| Level 4                 |      | C11 H13 N O2      | 191.09464 | 5.194    |
| Level 4                 |      | C11 H13 N O2      | 191.09475 | 10.015   |
| Level 4                 |      | C11 H13 N O3      | 207.0899  | 5.518    |
| Level 4                 |      | C11 H13 N3 O2     | 219.1009  | 4.482    |
| Level 4                 |      | C11 H13 N3 O3     | 235.09558 | 4.871    |
| Level 4                 |      | C11 H14 Cl F N2   | 228.08229 | 13.898   |
| Level 4                 |      | C11 H14 F2 O S    | 232.07401 | 12.837   |
| Level 4                 |      | C11 H14 N2        | 174.11598 | 8.916    |
| Level 4                 |      | C11 H14 N2 O2     | 206.10574 | 6.066    |
| Level 4                 |      | C11 H14 N2 O2     | 206.10585 | 7.952    |
| Level 4                 |      | C11 H15 F N3 O3 P | 287.08305 | 10.645   |
| Level 4                 |      | C11 H15 F3 N3 P S | 309.06718 | 6.032    |
| Level 4                 |      | C11 H15 F3 O3     | 252.09731 | 5.943    |
| Level 4                 |      | C11 H15 N O2      | 193.1104  | 5.389    |
| Level 4                 |      | C11 H15 N O2      | 193.1104  | 11.096   |
| Level 4                 |      | C11 H15 N O2 S    | 225.08246 | 6.245    |
| Level 4                 |      | C11 H15 N O3      | 209.10524 | 8.017    |
| Level 4                 |      | C11 H15 N O3      | 209.10547 | 8.518    |
| Level 4                 |      | C11 H15 N O3      | 209.10543 | 10.209   |
| Level 4                 |      | C11 H15 N3 O4     | 253.10625 | 7.032    |
| Level 4                 |      | C11 H15 N5 O3     | 265.1173  | 6.766    |

| Identification<br>level | Name | Formula            | Calc. MW  | RT [min] |
|-------------------------|------|--------------------|-----------|----------|
| Level 4                 |      | C11 H15 N5 O4      | 281.11239 | 5.14     |
| Level 4                 |      | C11 H16 F2 O2 S    | 250.08428 | 9.311    |
| Level 4                 |      | C11 H16 N2 O2      | 208.1213  | 6.936    |
| Level 4                 |      | C11 H16 N2 O2      | 208.12149 | 7.552    |
| Level 4                 |      | C11 H16 N4 O4      | 290.09766 | 14.36    |
| Level 4                 |      | C11 H16 O2         | 180.11501 | 18.832   |
| Level 4                 |      | C11 H16 O3 S       | 228.08219 | 13.027   |
| Level 4                 |      | C11 H16 O4         | 212.1024  | 8.267    |
| Level 4                 |      | C11 H16 O4         | 212.10227 | 8.347    |
| Level 4                 |      | C11 H17 F N3 O3 P  | 289.09836 | 12.426   |
| Level 4                 |      | C11 H17 N O        | 179.1311  | 5.922    |
| Level 4                 |      | C11 H17 N O        | 179.13108 | 8.077    |
| Level 4                 |      | C11 H17 N O5 S     | 275.08291 | 9.313    |
| Level 4                 |      | C11 H17 N5 O3      | 267.13296 | 5.452    |
| Level 4                 |      | C11 H18 F2 O3 S    | 268.09368 | 11.583   |
| Level 4                 |      | C11 H18 N2 O6      | 274.11626 | 1.99     |
| Level 4                 |      | C11 H18 N6 O3      | 282.144   | 5.691    |
| Level 4                 |      | C11 H18 O2 S       | 214.10304 | 11.68    |
| Level 4                 |      | C11 H19 F2 O3 P3   | 330.05153 | 13.003   |
| Level 4                 |      | C11 H19 F2 O6 P    | 316.08818 | 17.803   |
| Level 4                 |      | C11 H19 N O2       | 197.14157 | 11.028   |
| Level 4                 |      | C11 H19 N O3       | 213.1367  | 8.981    |
| Level 4                 |      | C11 H19 N O3       | 213.13675 | 12.163   |
| Level 4                 |      | C11 H19 N O5       | 245.12604 | 1.355    |
| Level 4                 |      | C11 H19 N O5       | 245.12602 | 1.565    |
| Level 4                 |      | C11 H19 N3 O2      | 225.14793 | 10.389   |
| Level 4                 |      | C11 H2 Cl F O6 P2  | 345.90085 | 1.002    |
| Level 4                 |      | C11 H20 F N4 P S2  | 322.08521 | 14.436   |
| Level 4                 |      | C11 H20 N2 O4      | 244.14226 | 11.634   |
| Level 4                 |      | C11 H20 N2 O5      | 260.1372  | 2.835    |
| Level 4                 |      | C11 H20 N2 O6      | 276.13187 | 1.815    |
| Level 4                 |      | C11 H20 O S        | 200.12349 | 13.608   |
| Level 4                 |      | C11 H20 O2 S       | 216.11904 | 11.202   |
| Level 4                 |      | C11 H20 O6         | 248.12616 | 8.784    |
| Level 4                 |      | C11 H20 O6         | 248.12601 | 8.981    |
| Level 4                 |      | C11 H21 F2 N2 O2 P | 282.13136 | 5.96     |
| Level 4                 |      | C11 H21 F2 N3 O S  | 281.13758 | 5.937    |
| Level 4                 |      | C11 H21 F3 N3 P S  | 315.11419 | 11.541   |
| Level 4                 |      | C11 H21 F3 N3 P S  | 315.11409 | 11.77    |
| Level 4                 |      | C11 H21 F3 N3 P S  | 315.11416 | 13.161   |
| Level 4                 |      | C11 H21 N O        | 183.16246 | 16.914   |
| Level 4                 |      | C11 H21 N O4       | 253.13154 | 6.829    |
| Level 4                 |      | C11 H21 N O5       | 247.14225 | 8.079    |
| Level 4                 |      | C11 H21 N O5       | 247.14205 | 10.534   |

| Identification<br>level | Name | Formula             | Calc. MW  | RT [min] |
|-------------------------|------|---------------------|-----------|----------|
| Level 4                 |      | C11 H21 N3          | 195.17368 | 13.02    |
| Level 4                 |      | C11 H22 F2 N O8 P   | 365.10441 | 8.562    |
| Level 4                 |      | C11 H22 F4 N3 O P   | 319.14429 | 1.089    |
| Level 4                 |      | C11 H22 N6 O4       | 302.17036 | 11.498   |
| Level 4                 |      | C11 H22 O2 S        | 218.13448 | 14.278   |
| Level 4                 |      | C11 H22 O4          | 218.15174 | 10.88    |
| Level 4                 |      | C11 H22 O4          | 218.15174 | 11.666   |
| Level 4                 |      | C11 H22 O5          | 234.14679 | 9.478    |
| Level 4                 |      | C11 H22 O5          | 234.14672 | 13.39    |
| Level 4                 |      | C11 H22 O8          | 282.13155 | 6.059    |
| Level 4                 |      | C11 H23 F N5 O4 P   | 339.14734 | 12.374   |
| Level 4                 |      | C11 H23 F2 N O2 S2  | 303.11439 | 10.86    |
| Level 4                 |      | C11 H23 F2 N O3 S2  | 319.10918 | 9.961    |
| Level 4                 |      | C11 H23 F2 N S      | 239.15214 | 13.844   |
| Level 4                 |      | C11 H23 F3 N3 P S   | 317.12988 | 14.289   |
| Level 4                 |      | C11 H23 N O2        | 201.17296 | 12.458   |
| Level 4                 |      | C11 H23 N O5        | 249.15747 | 7.602    |
| Level 4                 |      | C11 H23 N O6        | 265.1525  | 8.786    |
| Level 4                 |      | C11 H23 N O6        | 265.15255 | 8.982    |
| Level 4                 |      | C11 H24 F N O6 S    | 317.12978 | 13.45    |
| Level 4                 |      | C11 H24 F3 N3 O9    | 399.14656 | 8.314    |
| Level 4                 |      | C11 H24 N2 O3       | 232.17858 | 6.337    |
| Level 4                 |      | C11 H24 N9 P S      | 345.16107 | 15.792   |
| Level 4                 |      | C11 H24 O4          | 220.16759 | 11.064   |
| Level 4                 |      | C11 H24 O5          | 236.16228 | 10.278   |
| Level 4                 |      | C11 H24 O5          | 236.16255 | 10.604   |
| Level 4                 |      | C11 H24 O5          | 236.16255 | 10.723   |
| Level 4                 |      | C11 H25 F O5        | 256.16765 | 15.149   |
| Level 4                 |      | C11 H25 F3 N2 O6 P2 | 400.11437 | 19.273   |
| Level 4                 |      | C11 H25 N O4        | 235.17837 | 5.545    |
| Level 4                 |      | C11 H25 N O4        | 235.17819 | 8.274    |
| Level 4                 |      | C11 H25 N O5        | 251.17307 | 7.89     |
| Level 4                 |      | C11 H25 N O5        | 251.17313 | 8.452    |
| Level 4                 |      | C11 H25 N O5        | 251.17313 | 9.106    |
| Level 4                 |      | C11 H25 N O8        | 299.15816 | 6.066    |
| Level 4                 |      | C11 H26 F N4 O3 P S | 344.14452 | 11.846   |
| Level 4                 |      | C11 H26 F6 N2 O5    | 380.17358 | 18.102   |
| Level 4                 |      | C11 H27 F2 N O4 P2  | 337.13865 | 6.297    |
| Level 4                 |      | C11 H27 F2 N O8 S   | 371.14307 | 6.251    |
| Level 4                 |      | C11 H27 F3 N2 O2 S  | 308.17408 | 11.972   |
| Level 4                 |      | C11 H27 F3 N3 O3 P  | 337.17487 | 4.693    |
| Level 4                 |      | C11 H27 F3 S        | 248.17754 | 14.964   |
| Level 4                 |      | C11 H27 N O4        | 237.19396 | 9.578    |
| Level 4                 |      | C11 H27 N O4        | 237.19377 | 9.722    |

| Identification<br>level | Name | Formula               | Calc. MW  | RT [min] |
|-------------------------|------|-----------------------|-----------|----------|
| Level 4                 |      | C11 H27 N O7          | 285.1788  | 6.622    |
| Level 4                 |      | C11 H27 N7 S          | 289.20439 | 20.549   |
| Level 4                 |      | C11 H28 F N O8        | 321.17899 | 4.598    |
| Level 4                 |      | C11 H28 F2 O3 S       | 278.17316 | 14.02    |
| Level 4                 |      | C11 H28 F3 N3 O4      | 323.20273 | 13.535   |
| Level 4                 |      | C11 H29 F N2 S2       | 272.17543 | 19.742   |
| Level 4                 |      | C11 H29 F N6 O2       | 296.23332 | 19.708   |
| Level 4                 |      | C11 H29 F4 O5 P S     | 380.14212 | 13.388   |
| Level 4                 |      | C11 H3 F N O14 P S2   | 486.8718  | 1.03     |
| Level 4                 |      | C11 H3 O2 P S2        | 261.93124 | 1.061    |
| Level 4                 |      | C11 H30 Cl2 F N O2 S2 | 361.10784 | 16.782   |
| Level 4                 |      | C11 H30 F N O8        | 323.19454 | 11.228   |
| Level 4                 |      | C11 H30 F3 N4 O4 P    | 370.19655 | 17.331   |
| Level 4                 |      | C11 H30 F5 O6 P       | 384.17106 | 21.999   |
| Level 4                 |      | C11 H31 F N2 O7       | 322.21099 | 6.426    |
| Level 4                 |      | C11 H31 F2 N O2 S     | 279.20473 | 13.576   |
| Level 4                 |      | C11 H31 F2 N O3 S     | 295.19924 | 14.098   |
| Level 4                 |      | C11 H31 F2 N O6 S     | 343.1842  | 7.017    |
| Level 4                 |      | C11 H31 F3 N3 O3 P    | 341.20516 | 10.84    |
| Level 4                 |      | C11 H31 N O2 P2 S     | 303.15526 | 16.18    |
| Level 4                 |      | C11 H32 F P3          | 276.17007 | 18.513   |
| Level 4                 |      | C11 H32 N P3 S        | 303.14681 | 15.345   |
| Level 4                 |      | C11 H32 N2 S3         | 288.17288 | 17.039   |
| Level 4                 |      | C11 H33 F N8 S2       | 360.22546 | 20.502   |
| Level 4                 |      | C11 H33 N P2 S        | 273.18086 | 20.549   |
| Level 4                 |      | C11 H33 N10 P S2      | 400.20747 | 16.707   |
| Level 4                 |      | C11 H34 F10 N O P     | 417.22144 | 8.16     |
| Level 4                 |      | C11 H34 O6 P2         | 324.1837  | 11.392   |
| Level 4                 |      | C11 H35 F4 N S2       | 321.21509 | 15.451   |
| Level 4                 |      | C11 H36 F O3 P3       | 328.18627 | 16.819   |
| Level 4                 |      | C11 H36 F3 N O5 S     | 351.22561 | 6.006    |
| Level 4                 |      | C11 H36 F3 N O5 S     | 351.22569 | 14.843   |
| Level 4                 |      | C11 H36 F5 N O3 S     | 357.2339  | 22.032   |
| Level 4                 |      | C11 H37 F8 N O        | 351.27496 | 19.969   |
| Level 4                 |      | C11 H7 Br F N O2 S    | 314.9364  | 1.054    |
| Level 4                 |      | C11 H7 F N2 O4        | 250.03934 | 17.085   |
| Level 4                 |      | C11 H8 N2 O2          | 200.05883 | 8.219    |
| Level 4                 |      | C11 H9 N O3           | 203.05832 | 5.59     |
| Level 4                 |      | C12 Br F9 O           | 409.89887 | 1.099    |
| Level 4                 |      | C12 H Br Cl6 O2       | 465.73047 | 0.951    |
| Level 4                 |      | C12 H10 Br2 S         | 343.88645 | 1.155    |
| Level 4                 |      | C12 H10 N4 O2         | 242.07669 | 7.116    |
| Level 4                 |      | C12 H10 N4 O2         | 220.09472 | 7.132    |
| Level 4                 |      | C12 H10 N4 O2         | 242.07654 | 8.093    |

| Identification<br>level | Name | Formula            | Calc. MW  | RT [min] |
|-------------------------|------|--------------------|-----------|----------|
| Level 4                 |      | C12 H10 N4 O2      | 220.09488 | 8.192    |
| Level 4                 |      | C12 H10 N4 O2      | 242.07648 | 8.213    |
| Level 4                 |      | C12 H11 Cl N2 O2   | 250.05088 | 9.32     |
| Level 4                 |      | C12 H11 F3 O2      | 244.07112 | 9.123    |
| Level 4                 |      | C12 H11 N O        | 185.0843  | 12.297   |
| Level 4                 |      | C12 H11 N O2       | 201.07911 | 9.146    |
| Level 4                 |      | C12 H11 N O3       | 217.07402 | 5.098    |
| Level 4                 |      | C12 H11 N3         | 197.09535 | 5.707    |
| Level 4                 |      | C12 H11 N3 O       | 213.09017 | 5.315    |
| Level 4                 |      | C12 H11 N3 O2      | 229.08505 | 6.981    |
| Level 4                 |      | C12 H12 N2 O       | 200.09501 | 12.436   |
| Level 4                 |      | C12 H12 N2 O       | 200.09527 | 12.91    |
| Level 4                 |      | C12 H12 N2 O2      | 216.08977 | 7.046    |
| Level 4                 |      | C12 H12 N4         | 212.10621 | 5.298    |
| Level 4                 |      | C12 H12 N4         | 230.11679 | 5.3      |
| Level 4                 |      | C12 H12 N4 O2 S    | 276.06811 | 5.491    |
| Level 4                 |      | C12 H12 O4         | 220.07389 | 13.44    |
| Level 4                 |      | C12 H12 O5         | 253.09502 | 9.308    |
| Level 4                 |      | C12 H12 O5         | 236.06861 | 9.313    |
| Level 4                 |      | C12 H13 N O2       | 203.0948  | 13.355   |
| Level 4                 |      | C12 H13 N O3       | 219.08962 | 6.411    |
| Level 4                 |      | C12 H13 N O4       | 235.08445 | 5.415    |
| Level 4                 |      | C12 H13 N3 O2      | 231.10082 | 5.132    |
| Level 4                 |      | C12 H13 N3 O2      | 231.10081 | 5.533    |
| Level 4                 |      | C12 H14 F2 N O11 P | 417.02727 | 1.046    |
| Level 4                 |      | C12 H14 N2         | 186.11595 | 16.196   |
| Level 4                 |      | C12 H14 N2 O       | 202.11071 | 7.493    |
| Level 4                 |      | C12 H14 N2 O2      | 218.10579 | 8.454    |
| Level 4                 |      | C12 H14 N4 O2      | 246.11173 | 11.588   |
| Level 4                 |      | C12 H14 O2         | 190.0994  | 15.379   |
| Level 4                 |      | C12 H14 O3         | 206.09195 | 12.077   |
| Level 4                 |      | C12 H14 O4         | 222.08921 | 8.42     |
| Level 4                 |      | C12 H14 O4 S3      | 318.00515 | 8.313    |
| Level 4                 |      | C12 H15 F N4 O3    | 282.11217 | 11.245   |
| Level 4                 |      | C12 H15 N O2       | 205.11035 | 12.873   |
| Level 4                 |      | C12 H15 N O5       | 253.09507 | 12.53    |
| Level 4                 |      | C12 H15 N3 O       | 217.12157 | 11.024   |
| Level 4                 |      | C12 H15 N5 O2 S    | 293.09441 | 2.606    |
| Level 4                 |      | C12 H15 N5 O3      | 277.11748 | 4.11     |
| Level 4                 |      | C12 H15 N5 O3 S    | 309.08999 | 2.084    |
| Level 4                 |      | C12 H16 F N O      | 209.12174 | 8.144    |
| Level 4                 |      | C12 H16 F2 N2 S    | 258.1006  | 8.171    |
| Level 4                 |      | C12 H16 F2 S       | 230.09442 | 16.742   |
| Level 4                 |      | C12 H16 F6 O3      | 322.10031 | 11.027   |

| Identification<br>level | Name | Formula            | Calc. MW  | RT [min] |
|-------------------------|------|--------------------|-----------|----------|
| Level 4                 |      | C12 H16 N2 O2      | 220.12141 | 12.588   |
| Level 4                 |      | C12 H16 N2 O3      | 236.11621 | 8.281    |
| Level 4                 |      | C12 H16 N4         | 216.13765 | 8.212    |
| Level 4                 |      | C12 H16 N4 O2      | 248.12732 | 13.384   |
| Level 4                 |      | C12 H16 O2         | 192.11536 | 16.328   |
| Level 4                 |      | C12 H16 O4         | 224.10498 | 10.344   |
| Level 4                 |      | C12 H17 F N2 S2    | 272.08115 | 13.79    |
| Level 4                 |      | C12 H17 F O5       | 260.10536 | 13.551   |
| Level 4                 |      | C12 H17 N O2       | 207.12594 | 4.779    |
| Level 4                 |      | C12 H17 N O2       | 207.12602 | 9.832    |
| Level 4                 |      | C12 H17 N2 O2 P3 S | 346.02236 | 17.178   |
| Level 4                 |      | C12 H17 N5 O2      | 263.13807 | 3.947    |
| Level 4                 |      | C12 H17 N5 O2      | 263.13807 | 4.29     |
| Level 4                 |      | C12 H17 N5 O3      | 279.13318 | 7.657    |
| Level 4                 |      | C12 H18 F6 N O P S | 369.07614 | 14.336   |
| Level 4                 |      | C12 H18 N2 O       | 206.14205 | 7.691    |
| Level 4                 |      | C12 H18 N2 O       | 206.14202 | 10.431   |
| Level 4                 |      | C12 H18 N2 O2      | 222.13674 | 5.459    |
| Level 4                 |      | C12 H18 N2 O2      | 222.1368  | 6.327    |
| Level 4                 |      | C12 H18 N2 O2      | 222.13689 | 13.52    |
| Level 4                 |      | C12 H18 N2 O3      | 220.12117 | 4.1      |
| Level 4                 |      | C12 H18 N2 O3      | 220.1213  | 12.269   |
| Level 4                 |      | C12 H18 N2 O3 S    | 270.10405 | 5.999    |
| Level 4                 |      | C12 H18 N2 O3 S    | 270.10396 | 7.518    |
| Level 4                 |      | C12 H18 N6         | 246.15947 | 18.569   |
| Level 4                 |      | C12 H18 O2         | 194.13084 | 15.549   |
| Level 4                 |      | C12 H18 O3         | 210.12326 | 9.009    |
| Level 4                 |      | C12 H18 O3         | 210.12306 | 12.679   |
| Level 4                 |      | C12 H18 O4         | 208.11021 | 11.591   |
| Level 4                 |      | C12 H18 O4         | 248.10486 | 12.603   |
| Level 4                 |      | C12 H18 O4         | 208.11011 | 12.971   |
| Level 4                 |      | C12 H18 O5         | 280.07385 | 14.967   |
| Level 4                 |      | C12 H19 F3 N3 O2 P | 325.11744 | 13.029   |
| Level 4                 |      | C12 H19 F3 O4      | 284.12383 | 10.529   |
| Level 4                 |      | C12 H19 N O        | 193.14694 | 8.027    |
| Level 4                 |      | C12 H19 N O3       | 225.13657 | 8.007    |
| Level 4                 |      | C12 H19 N O4 S     | 273.10361 | 9.616    |
| Level 4                 |      | C12 H19 N O5 S     | 289.09856 | 10.504   |
| Level 4                 |      | C12 H19 N O5 S     | 289.09848 | 10.953   |
| Level 4                 |      | C12 H19 N O5 S     | 289.09856 | 11.232   |
| Level 4                 |      | C12 H19 N O5 S     | 289.09861 | 11.324   |
| Level 4                 |      | C12 H19 N O5 S     | 289.09846 | 12.103   |
| Level 4                 |      | C12 H19 N O6       | 273.12135 | 6.642    |
| Level 4                 |      | C12 H2 Br2 F6 O2   | 449.83275 | 1.083    |



| Identification<br>level | Name | Formula               | Calc. MW  | RT [min] |
|-------------------------|------|-----------------------|-----------|----------|
| Level 4                 |      | C12 H2 F3 N8 P        | 346.00872 | 29.356   |
| Level 4                 |      | C12 H20 Cl F N2 O3    | 294.11378 | 16.134   |
| Level 4                 |      | C12 H20 F P3          | 276.07619 | 16.24    |
| Level 4                 |      | C12 H20 F2 N O4 P     | 311.10919 | 12.389   |
| Level 4                 |      | C12 H20 F3 N O6       | 331.12428 | 2.437    |
| Level 4                 |      | C12 H20 N2 O3         | 240.14727 | 10.327   |
| Level 4                 |      | C12 H20 O             | 180.15155 | 18.607   |
| Level 4                 |      | C12 H20 O2            | 196.14646 | 16.872   |
| Level 4                 |      | C12 H21 F2 N O S      | 265.13162 | 7.044    |
| Level 4                 |      | C12 H21 F2 N O2 S     | 281.12656 | 9.313    |
| Level 4                 |      | C12 H21 N             | 162.14097 | 13.35    |
| Level 4                 |      | C12 H21 N O2          | 211.15719 | 11.506   |
| Level 4                 |      | C12 H21 N O4          | 243.14719 | 13.188   |
| Level 4                 |      | C12 H21 N3 O5         | 287.14822 | 5.173    |
| Level 4                 |      | C12 H22 Cl F3 N4 O3   | 362.134   | 16.673   |
| Level 4                 |      | C12 H22 Cl3 N O8      | 413.04126 | 9.131    |
| Level 4                 |      | C12 H22 F2 O2 S2      | 300.10348 | 13.706   |
| Level 4                 |      | C12 H22 F3 P S        | 286.11399 | 10.964   |
| Level 4                 |      | C12 H22 N2 O2         | 226.16819 | 7.427    |
| Level 4                 |      | C12 H22 N2 O6         | 290.14754 | 4.816    |
| Level 4                 |      | C12 H22 N2 O6         | 290.14768 | 6.099    |
| Level 4                 |      | C12 H22 N4            | 222.1843  | 1.185    |
| Level 4                 |      | C12 H22 N4 O2         | 254.17403 | 6.702    |
| Level 4                 |      | C12 H22 O6            | 284.1235  | 10.053   |
| Level 4                 |      | C12 H22 O6            | 262.14165 | 10.177   |
| Level 4                 |      | C12 H22 O6            | 284.12369 | 10.391   |
| Level 4                 |      | C12 H22 O6            | 262.14144 | 10.531   |
| Level 4                 |      | C12 H22 O6            | 262.14137 | 10.669   |
| Level 4                 |      | C12 H22 O7            | 278.13645 | 10.238   |
| Level 4                 |      | C12 H22 O7            | 278.13643 | 10.605   |
| Level 4                 |      | C12 H22 O7            | 278.13636 | 11.029   |
| Level 4                 |      | C12 H23 F2 N O2 S2    | 315.11415 | 13.549   |
| Level 4                 |      | C12 H23 F2 N S        | 251.15199 | 19.079   |
| Level 4                 |      | C12 H23 F2 O2 P S     | 300.11233 | 7.96     |
| Level 4                 |      | C12 H23 F3 N4 O3 S    | 360.1436  | 10.794   |
| Level 4                 |      | C12 H23 N             | 181.18346 | 8.612    |
| Level 4                 |      | C12 H23 N O8          | 309.14214 | 2.425    |
| Level 4                 |      | C12 H23 N3 O S2       | 289.12895 | 10.25    |
| Level 4                 |      | C12 H24 Cl F3 N4 O P2 | 394.10666 | 19.266   |
| Level 4                 |      | C12 H24 F2 N2 S       | 266.16207 | 11.722   |
| Level 4                 |      | C12 H24 N2 O          | 212.18891 | 8.01     |
| Level 4                 |      | C12 H24 N2 O          | 212.18875 | 8.727    |
| Level 4                 |      | C12 H24 N2 O3         | 244.17886 | 6.138    |
| Level 4                 |      | C12 H24 N2 O8 S       | 356.12522 | 12.404   |

| Identification<br>level | Name | Formula              | Calc. MW  | RT [min] |
|-------------------------|------|----------------------|-----------|----------|
| Level 4                 |      | C12 H24 N2 S2        | 260.13867 | 16.975   |
| Level 4                 |      | C12 H24 O5           | 248.16213 | 10.676   |
| Level 4                 |      | C12 H24 O5           | 248.16231 | 12.194   |
| Level 4                 |      | C12 H24 O5           | 270.14429 | 14.394   |
| Level 4                 |      | C12 H24 O6           | 264.15703 | 10.575   |
| Level 4                 |      | C12 H24 O6           | 264.15703 | 10.881   |
| Level 4                 |      | C12 H24 O6           | 264.15705 | 11.077   |
| Level 4                 |      | C12 H24 O6           | 264.15728 | 11.312   |
| Level 4                 |      | C12 H24 O6           | 264.1571  | 11.498   |
| Level 4                 |      | C12 H24 O6           | 264.15737 | 11.592   |
| Level 4                 |      | C12 H24 O6           | 264.15704 | 11.666   |
| Level 4                 |      | C12 H24 O6           | 264.15734 | 11.906   |
| Level 4                 |      | C12 H25 F N3 O3 P S2 | 373.10631 | 18.535   |
| Level 4                 |      | C12 H25 F2 N P2 S    | 315.11417 | 12.845   |
| Level 4                 |      | C12 H25 F2 N S       | 253.16778 | 16.702   |
| Level 4                 |      | C12 H25 N O5         | 263.17327 | 4.683    |
| Level 4                 |      | C12 H25 N O6         | 279.16799 | 2.471    |
| Level 4                 |      | C12 H25 N O6         | 279.16784 | 10.163   |
| Level 4                 |      | C12 H25 N O6         | 279.16789 | 10.469   |
| Level 4                 |      | C12 H25 N O6         | 279.16826 | 10.671   |
| Level 4                 |      | C12 H25 N O6         | 279.16829 | 11.052   |
| Level 4                 |      | C12 H25 N O7         | 295.16333 | 10.595   |
| Level 4                 |      | C12 H25 N O7         | 295.16299 | 11.337   |
| Level 4                 |      | C12 H25 N3 O4        | 275.18429 | 1.369    |
| Level 4                 |      | C12 H25 N5 O2        | 271.20069 | 5.99     |
| Level 4                 |      | C12 H25 N5 O2        | 271.20053 | 6.95     |
| Level 4                 |      | C12 H26 F3 N8 O5 P   | 450.17177 | 8.158    |
| Level 4                 |      | C12 H26 O S2         | 250.14255 | 18.209   |
| Level 4                 |      | C12 H26 O5           | 250.17781 | 11.158   |
| Level 4                 |      | C12 H27 F N O P      | 251.18126 | 11.455   |
| Level 4                 |      | C12 H27 F N O P      | 251.18122 | 12.138   |
| Level 4                 |      | C12 H27 N O5         | 265.18855 | 11.369   |
| Level 4                 |      | C12 H27 N O6         | 281.18363 | 11.717   |
| Level 4                 |      | C12 H27 N O7         | 297.17851 | 4.704    |
| Level 4                 |      | C12 H28 F N10 O P S2 | 442.16072 | 14.12    |
| Level 4                 |      | C12 H28 F3 O3 P      | 308.17345 | 7.861    |
| Level 4                 |      | C12 H28 F3 O3 P      | 308.1736  | 12.979   |
| Level 4                 |      | C12 H28 F4 N O P     | 309.1841  | 14.405   |
| Level 4                 |      | C12 H28 N2 O3        | 248.21    | 5.349    |
| Level 4                 |      | C12 H28 S2           | 236.16255 | 10.933   |
| Level 4                 |      | C12 H29 F2 N O S     | 273.19438 | 15.156   |
| Level 4                 |      | C12 H29 F4 N O2 P2   | 357.16084 | 16.323   |
| Level 4                 |      | C12 H29 N O5         | 267.20431 | 12.459   |
| Level 4                 |      | C12 H29 N2 O P S3    | 344.11903 | 11.229   |

| Identification<br>level | Name | Formula               | Calc. MW  | RT [min] |
|-------------------------|------|-----------------------|-----------|----------|
| Level 4                 |      | C12 H30 F N O8        | 335.19461 | 12.822   |
| Level 4                 |      | C12 H30 F N O9        | 351.18953 | 13.331   |
| Level 4                 |      | C12 H31 F2 N O3 S     | 307.19942 | 5.051    |
| Level 4                 |      | C12 H31 F2 N O3 S     | 307.19946 | 14.406   |
| Level 4                 |      | C12 H31 F7 O3 S2      | 420.16066 | 7.258    |
| Level 4                 |      | C12 H31 N3 O S3       | 329.16273 | 7.083    |
| Level 4                 |      | C12 H32 F3 N2 O4 P    | 356.20449 | 8.343    |
| Level 4                 |      | C12 H33 F N10 P2      | 398.23491 | 13.573   |
| Level 4                 |      | C12 H33 F4 N7 O2      | 383.26405 | 7.063    |
| Level 4                 |      | C12 H34 F4 O7         | 366.22545 | 14.059   |
| Level 4                 |      | C12 H34 N2 O S3       | 318.1836  | 18.29    |
| Level 4                 |      | C12 H35 F2 N4 O4 P S  | 400.20719 | 14.566   |
| Level 4                 |      | C12 H36 F4 S2         | 320.21994 | 16.848   |
| Level 4                 |      | C12 H36 N10 S2        | 384.25592 | 14.035   |
| Level 4                 |      | C12 H38 F N7 O3 S2    | 411.24667 | 7.585    |
| Level 4                 |      | C12 H38 N5 O6 P       | 379.257   | 17.41    |
| Level 4                 |      | C12 H39 F6 N3 O7      | 451.26991 | 21.362   |
| Level 4                 |      | C12 H40 N P S2        | 293.23326 | 19.238   |
| Level 4                 |      | C12 H40 N5 O3 P       | 333.28782 | 20.502   |
| Level 4                 |      | C12 H40 N5 O6 P       | 381.27249 | 15.015   |
| Level 4                 |      | C12 H41 F6 N O P2     | 391.25692 | 8.372    |
| Level 4                 |      | C12 H42 N O P3 S2     | 373.19237 | 17.688   |
| Level 4                 |      | C12 H6 Br4 O4         | 529.69945 | 1        |
| Level 4                 |      | C12 H6 N2 O8 P2 S     | 399.9316  | 0.866    |
| Level 4                 |      | C12 H8 F2 N2 O3 P2 S2 | 391.94235 | 1.075    |
| Level 4                 |      | C12 H9 Cl4 N2 O2 P3   | 445.86346 | 12.568   |
| Level 4                 |      | C12 H9 F N2 O         | 216.0704  | 13.264   |
| Level 4                 |      | C12 H9 N5             | 223.08468 | 7.933    |
| Level 4                 |      | C13 H12 F2 N2 O S     | 282.06429 | 12.285   |
| Level 4                 |      | C13 H12 F6 N2 S2      | 374.03403 | 10.359   |
| Level 4                 |      | C13 H12 N2 O          | 212.09511 | 9.341    |
| Level 4                 |      | C13 H12 N2 O2         | 228.09002 | 7.834    |
| Level 4                 |      | C13 H12 N2 O2         | 228.09013 | 8.968    |
| Level 4                 |      | C13 H12 N4 O2         | 256.09646 | 14.132   |
| Level 4                 |      | C13 H13 N O           | 199.09965 | 5.058    |
| Level 4                 |      | C13 H13 N O           | 199.09986 | 8.343    |
| Level 4                 |      | C13 H13 N3 O3 S       | 291.06789 | 8.377    |
| Level 4                 |      | C13 H14 F2 N2 S       | 268.08501 | 13.947   |
| Level 4                 |      | C13 H14 N2 O3         | 246.10041 | 10.577   |
| Level 4                 |      | C13 H15 Cl F4 N2 O S  | 358.05401 | 14.961   |
| Level 4                 |      | C13 H15 F S           | 222.08684 | 23.796   |
| Level 4                 |      | C13 H15 F4 N3 S       | 321.09248 | 13.624   |
| Level 4                 |      | C13 H15 F5 N10 O      | 422.13414 | 15.325   |
| Level 4                 |      | C13 H15 N O3          | 233.10282 | 11.099   |

| Identification<br>level | Name | Formula           | Calc. MW  | RT [min] |
|-------------------------|------|-------------------|-----------|----------|
| Level 4                 |      | C13 H15 N3        | 213.12658 | 5.319    |
| Level 4                 |      | C13 H16 Cl N3 O   | 265.09976 | 5.707    |
| Level 4                 |      | C13 H16 N2 O2     | 232.12144 | 16.272   |
| Level 4                 |      | C13 H16 N4 O S2   | 308.07682 | 8.328    |
| Level 4                 |      | C13 H16 N4 O2     | 260.12718 | 7.465    |
| Level 4                 |      | C13 H16 O         | 188.12013 | 17.366   |
| Level 4                 |      | C13 H16 O3        | 220.11007 | 15.372   |
| Level 4                 |      | C13 H17 N O       | 203.131   | 16.812   |
| Level 4                 |      | C13 H17 N O2      | 219.12608 | 5.151    |
| Level 4                 |      | C13 H17 N O2      | 219.12611 | 9.322    |
| Level 4                 |      | C13 H17 N O5      | 267.1107  | 6.079    |
| Level 4                 |      | C13 H17 N3 O2     | 247.1319  | 8.259    |
| Level 4                 |      | C13 H17 N3 O2     | 247.1319  | 9.095    |
| Level 4                 |      | C13 H17 N5 O      | 259.14226 | 6.317    |
| Level 4                 |      | C13 H18 F O P     | 240.10801 | 1.306    |
| Level 4                 |      | C13 H18 F O3 P    | 272.09819 | 10.91    |
| Level 4                 |      | C13 H18 N O3 P    | 267.10199 | 7.23     |
| Level 4                 |      | C13 H18 N2 O      | 218.14194 | 16.108   |
| Level 4                 |      | C13 H18 N2 O      | 218.14189 | 16.271   |
| Level 4                 |      | C13 H18 N2 O2     | 234.13704 | 6.012    |
| Level 4                 |      | C13 H18 N2 O2     | 234.13678 | 13.366   |
| Level 4                 |      | C13 H18 O         | 190.13595 | 19.141   |
| Level 4                 |      | C13 H18 O2        | 206.13087 | 10.359   |
| Level 4                 |      | C13 H18 O3        | 222.12593 | 17.337   |
| Level 4                 |      | C13 H18 O5 S      | 286.0877  | 12.967   |
| Level 4                 |      | C13 H18 O5 S      | 286.08753 | 13.704   |
| Level 4                 |      | C13 H19 F N P     | 239.1239  | 1.328    |
| Level 4                 |      | C13 H19 N O2      | 221.14157 | 7.295    |
| Level 4                 |      | C13 H19 N O2      | 221.14159 | 9.878    |
| Level 4                 |      | C13 H19 N O3      | 237.13651 | 5.538    |
| Level 4                 |      | C13 H19 N O4      | 253.13148 | 7.935    |
| Level 4                 |      | C13 H19 N O6 S    | 317.09364 | 8.386    |
| Level 4                 |      | C13 H19 N3 O      | 233.15288 | 5.434    |
| Level 4                 |      | C13 H19 N5 O      | 261.15888 | 5.914    |
| Level 4                 |      | C13 H19 N5 O3     | 293.14865 | 8.566    |
| Level 4                 |      | C13 H20 Cl N O    | 241.12348 | 12.095   |
| Level 4                 |      | C13 H20 F P       | 226.12877 | 1.295    |
| Level 4                 |      | C13 H20 F2 N4 O S | 318.13273 | 10.188   |
| Level 4                 |      | C13 H20 N2 O2     | 236.15245 | 6.504    |
| Level 4                 |      | C13 H20 N6        | 260.17514 | 20.151   |
| Level 4                 |      | C13 H20 O         | 192.15173 | 15.144   |
| Level 4                 |      | C13 H20 O S2      | 256.09461 | 8.141    |
| Level 4                 |      | C13 H20 O2        | 208.1463  | 16.761   |
| Level 4                 |      | C13 H20 O3        | 206.13088 | 13.578   |

| Identification<br>level | Name | Formula            | Calc. MW  | RT [min] |
|-------------------------|------|--------------------|-----------|----------|
| Level 4                 |      | C13 H20 O4         | 240.13625 | 13.545   |
| Level 4                 |      | C13 H20 O4         | 240.1361  | 15.916   |
| Level 4                 |      | C13 H20 O6         | 254.11258 | 6.34     |
| Level 4                 |      | C13 H21 F O2       | 228.15167 | 17.493   |
| Level 4                 |      | C13 H21 F O2       | 228.15184 | 18       |
| Level 4                 |      | C13 H21 F4 N5 O3   | 371.15796 | 12.256   |
| Level 4                 |      | C13 H21 N          | 191.16737 | 6.862    |
| Level 4                 |      | C13 H21 N O        | 207.16245 | 5.981    |
| Level 4                 |      | C13 H21 N O3       | 239.15234 | 6.069    |
| Level 4                 |      | C13 H21 N O3       | 239.15212 | 15.041   |
| Level 4                 |      | C13 H21 N O4 S     | 287.11919 | 10.604   |
| Level 4                 |      | C13 H21 N O4 S     | 287.1193  | 11.345   |
| Level 4                 |      | C13 H21 N O5 S     | 303.11421 | 11.705   |
| Level 4                 |      | C13 H21 N O5 S     | 303.11418 | 11.909   |
| Level 4                 |      | C13 H21 N O5 S     | 303.11414 | 12.154   |
| Level 4                 |      | C13 H21 N O5 S     | 303.11399 | 12.638   |
| Level 4                 |      | C13 H21 N O5 S     | 303.11417 | 12.955   |
| Level 4                 |      | C13 H21 N O5 S     | 303.11426 | 13.7     |
| Level 4                 |      | C13 H22 F3 P S2    | 330.0857  | 9.456    |
| Level 4                 |      | C13 H22 N2 O2      | 260.15265 | 11.761   |
| Level 4                 |      | C13 H22 N2 O2      | 238.16815 | 13.22    |
| Level 4                 |      | C13 H22 N6 O       | 278.1858  | 6.721    |
| Level 4                 |      | C13 H22 O3         | 226.15689 | 16.755   |
| Level 4                 |      | C13 H22 O3         | 248.13867 | 16.765   |
| Level 4                 |      | C13 H22 O3         | 208.14646 | 17.902   |
| Level 4                 |      | C13 H23 F N2 O4    | 290.16338 | 8.145    |
| Level 4                 |      | C13 H23 F O3       | 246.16218 | 15.366   |
| Level 4                 |      | C13 H23 F O4       | 262.15717 | 12.752   |
| Level 4                 |      | C13 H23 F2 N S     | 263.15215 | 5.999    |
| Level 4                 |      | C13 H23 F3 N3 O3 P | 357.14216 | 12.64    |
| Level 4                 |      | C13 H23 N O2       | 225.17274 | 7.457    |
| Level 4                 |      | C13 H23 N O2       | 207.16247 | 10.764   |
| Level 4                 |      | C13 H24 Cl N9 O    | 357.17843 | 16.67    |
| Level 4                 |      | C13 H24 F2 N4 S2   | 338.14019 | 19.266   |
| Level 4                 |      | C13 H24 F2 S       | 250.15705 | 16.696   |
| Level 4                 |      | C13 H24 F2 S       | 250.15688 | 17.038   |
| Level 4                 |      | C13 H24 F2 S       | 250.15682 | 18.862   |
| Level 4                 |      | C13 H24 N2 O       | 224.1888  | 5.68     |
| Level 4                 |      | C13 H24 N2 O6      | 304.16339 | 7.012    |
| Level 4                 |      | C13 H24 N7 O2 P    | 341.17381 | 15.606   |
| Level 4                 |      | C13 H24 O2 S2      | 276.12232 | 6.995    |
| Level 4                 |      | C13 H25 F N2 O6    | 324.16893 | 11.174   |
| Level 4                 |      | C13 H25 F O4       | 264.17269 | 18.463   |
| Level 4                 |      | C13 H25 F2 N2 O3 P | 326.15776 | 7.112    |

| Identification<br>level | Name | Formula             | Calc. MW  | RT [min] |
|-------------------------|------|---------------------|-----------|----------|
| Level 4                 |      | C13 H25 F3 O2 S     | 302.15208 | 16.668   |
| Level 4                 |      | C13 H25 N O         | 211.19368 | 9.849    |
| Level 4                 |      | C13 H25 N O4        | 259.1783  | 7.746    |
| Level 4                 |      | C13 H25 N6 O P S    | 344.15559 | 12.441   |
| Level 4                 |      | C13 H26 F5 N O2 P2  | 385.13713 | 9.636    |
| Level 4                 |      | C13 H26 N6 O4       | 330.20184 | 14.058   |
| Level 4                 |      | C13 H26 O14         | 406.13203 | 21.945   |
| Level 4                 |      | C13 H26 O6          | 278.17308 | 13.965   |
| Level 4                 |      | C13 H26 O7          | 294.16791 | 10.672   |
| Level 4                 |      | C13 H27 F N P S     | 279.15874 | 9.129    |
| Level 4                 |      | C13 H27 F N2 O S2   | 310.15454 | 18.639   |
| Level 4                 |      | C13 H27 F O3        | 250.19354 | 17.597   |
| Level 4                 |      | C13 H27 F2 N O3 S2  | 347.14062 | 9.69     |
| Level 4                 |      | C13 H27 F3 N3 O P S | 361.15633 | 11.474   |
| Level 4                 |      | C13 H27 F5 O P2     | 356.14488 | 13.33    |
| Level 4                 |      | C13 H27 N O10       | 357.16355 | 6.578    |
| Level 4                 |      | C13 H27 N O7        | 309.17883 | 9.768    |
| Level 4                 |      | C13 H27 N4 O P      | 286.1931  | 19.335   |
| Level 4                 |      | C13 H27 N5 O3       | 301.21145 | 8.513    |
| Level 4                 |      | C13 H28 F P S       | 266.16301 | 8.406    |
| Level 4                 |      | C13 H28 F2 N3 P     | 295.1989  | 10.879   |
| Level 4                 |      | C13 H28 O8          | 312.17841 | 7.558    |
| Level 4                 |      | C13 H28 O8          | 312.17867 | 7.684    |
| Level 4                 |      | C13 H29 F2 N O S    | 285.19404 | 17.08    |
| Level 4                 |      | C13 H29 F2 N O2 S   | 301.18882 | 16.586   |
| Level 4                 |      | C13 H29 F2 N O2 S   | 301.18886 | 20.138   |
| Level 4                 |      | C13 H29 F2 N S      | 269.19904 | 17.126   |
| Level 4                 |      | C13 H29 F4 O3 P     | 340.17848 | 9.537    |
| Level 4                 |      | C13 H29 N O7        | 311.19454 | 10.687   |
| Level 4                 |      | C13 H29 N4 O4 P     | 336.19387 | 13.444   |
| Level 4                 |      | C13 H30 F N O3      | 267.22001 | 17.597   |
| Level 4                 |      | C13 H30 N2 O5 S2    | 358.16064 | 13.371   |
| Level 4                 |      | C13 H31 F2 N S      | 271.21446 | 18.833   |
| Level 4                 |      | C13 H31 N3 O S3     | 341.16263 | 16.329   |
| Level 4                 |      | C13 H32 F P S       | 270.19404 | 5.794    |
| Level 4                 |      | C13 H32 O2 S4       | 348.12771 | 19.73    |
| Level 4                 |      | C13 H33 F2 N O5 S   | 353.20519 | 13.547   |
| Level 4                 |      | C13 H34 F2 O6 S     | 356.20412 | 8.29     |
| Level 4                 |      | C13 H34 F6 N2 O5    | 412.23628 | 10.643   |
| Level 4                 |      | C13 H35 F2 N O3 S   | 323.23046 | 16.924   |
| Level 4                 |      | C13 H35 F3 N3 P     | 321.25165 | 20.306   |
| Level 4                 |      | C13 H36 F2 P2 S     | 324.19811 | 11.426   |
| Level 4                 |      | C13 H37 F4 N O6     | 379.25661 | 16.731   |
| Level 4                 |      | C13 H37 F4 N O7     | 395.2519  | 6.781    |

| Identification<br>level | Name | Formula             | Calc. MW  | RT [min] |
|-------------------------|------|---------------------|-----------|----------|
| Level 4                 |      | C13 H37 F5 N O6 P   | 429.22674 | 12.873   |
| Level 4                 |      | C13 H37 N4 O2 P     | 312.26643 | 20.515   |
| Level 4                 |      | C13 H38 F N O11     | 403.24191 | 7.976    |
| Level 4                 |      | C13 H38 F12 N6 O10  | 666.24584 | 17.801   |
| Level 4                 |      | C13 H38 F4 O15      | 510.21514 | 11.454   |
| Level 4                 |      | C13 H38 F5 N5 O3    | 407.28825 | 18.273   |
| Level 4                 |      | C13 H39 F N9 O6 P   | 467.27349 | 15.773   |
| Level 4                 |      | C13 H39 F2 N O S3   | 359.21507 | 7.105    |
| Level 4                 |      | C13 H39 F2 N O S3   | 359.21566 | 7.873    |
| Level 4                 |      | C13 H39 F2 N10 O4 P | 468.28663 | 14.791   |
| Level 4                 |      | C13 H39 F2 N7 O     | 347.31876 | 16.902   |
| Level 4                 |      | C13 H39 P3          | 288.22727 | 13.001   |
| Level 4                 |      | C13 H4 Cl F2 N5     | 303.01222 | 10.47    |
| Level 4                 |      | C13 H40 F2 N10 O4 S | 470.29286 | 15.849   |
| Level 4                 |      | C13 H41 F6 N3 O2 S  | 417.28285 | 20.218   |
| Level 4                 |      | C13 H41 N3 S3       | 335.24622 | 21.395   |
| Level 4                 |      | C13 H41 N7 O7 S     | 439.27816 | 14.967   |
| Level 4                 |      | C13 H43 N7 O2 S3    | 425.26257 | 15.972   |
| Level 4                 |      | C13 H44 F5 N O7 S   | 453.2759  | 14.677   |
| Level 4                 |      | C13 H44 N5 O P S2   | 381.27284 | 17.231   |
| Level 4                 |      | C13 H6 Br4 Cl2 O2   | 579.6483  | 17.847   |
| Level 4                 |      | C13 H6 F3 N5 O      | 305.05267 | 11.195   |
| Level 4                 |      | C13 H8 N2 O2        | 224.0587  | 14.178   |
| Level 4                 |      | C13 H8 O3           | 212.04764 | 11.112   |
| Level 4                 |      | C13 H9 N5 O3        | 283.07053 | 11.195   |
| Level 4                 |      | C14 H10 F16 N6      | 566.07115 | 18.612   |
| Level 4                 |      | C14 H10 F3 N2 P     | 294.054   | 11.222   |
| Level 4                 |      | C14 H10 N2 O2       | 238.0741  | 17.297   |
| Level 4                 |      | C14 H12 F2 N10 S    | 390.09257 | 11.039   |
| Level 4                 |      | C14 H12 O3          | 228.07869 | 16.712   |
| Level 4                 |      | C14 H12 O4          | 244.07357 | 14.611   |
| Level 4                 |      | C14 H13 N S         | 227.07677 | 1.38     |
| Level 4                 |      | C14 H13 N3          | 245.09128 | 8.409    |
| Level 4                 |      | C14 H13 N3 O S      | 271.07801 | 11.388   |
| Level 4                 |      | C14 H14 Cl N O S    | 279.04863 | 12.04    |
| Level 4                 |      | C14 H14 F4 N9 O12 P | 607.04357 | 17.635   |
| Level 4                 |      | C14 H14 N2 O3       | 258.10045 | 11.643   |
| Level 4                 |      | C14 H14 N4 O        | 254.1167  | 6.704    |
| Level 4                 |      | C14 H14 O4          | 246.08713 | 13.059   |
| Level 4                 |      | C14 H14 O4          | 246.08915 | 13.21    |
| Level 4                 |      | C14 H14 O4          | 246.08908 | 13.332   |
| Level 4                 |      | C14 H14 O5          | 262.0841  | 10.218   |
| Level 4                 |      | C14 H15 Cl N2 O2    | 278.08232 | 10.336   |
| Level 4                 |      | C14 H15 F3 O        | 256.10742 | 11.566   |

| Identification<br>level | Name | Formula            | Calc. MW  | RT [min] |
|-------------------------|------|--------------------|-----------|----------|
| Level 4                 |      | C14 H15 N O2       | 229.11034 | 14.841   |
| Level 4                 |      | C14 H15 N O3       | 245.10539 | 6.672    |
| Level 4                 |      | C14 H15 N3 O       | 263.10156 | 4.325    |
| Level 4                 |      | C14 H15 N3 O7      | 337.09091 | 8.6      |
| Level 4                 |      | C14 H15 N7 S3      | 377.0544  | 12.402   |
| Level 4                 |      | C14 H15 O3 P       | 262.07545 | 11.947   |
| Level 4                 |      | C14 H16 F N4 O2 P  | 322.10031 | 10.605   |
| Level 4                 |      | C14 H16 F7 N S2    | 395.06124 | 10.618   |
| Level 4                 |      | C14 H16 F9 N4 O P  | 458.09132 | 19.393   |
| Level 4                 |      | C14 H16 N2 O2      | 244.12152 | 12.391   |
| Level 4                 |      | C14 H16 N2 O2      | 244.1212  | 15.626   |
| Level 4                 |      | C14 H16 N2 O3      | 260.11633 | 11.024   |
| Level 4                 |      | C14 H16 N4 O2      | 272.12743 | 6.545    |
| Level 4                 |      | C14 H16 N4 O4      | 304.11352 | 6.074    |
| Level 4                 |      | C14 H17 Cl F2 O3 S | 338.05616 | 13.785   |
| Level 4                 |      | C14 H17 N O4       | 263.11604 | 11.292   |
| Level 4                 |      | C14 H17 N3 O2      | 259.13209 | 6.374    |
| Level 4                 |      | C14 H17 N3 O5      | 307.11671 | 5.204    |
| Level 4                 |      | C14 H18 F O8 P     | 364.07111 | 10.899   |
| Level 4                 |      | C14 H18 F2 N3 O P  | 313.11574 | 9.674    |
| Level 4                 |      | C14 H18 F4 O3      | 310.11831 | 13.539   |
| Level 4                 |      | C14 H18 N2 O2      | 246.13684 | 6.533    |
| Level 4                 |      | C14 H18 N2 O2      | 246.137   | 13.155   |
| Level 4                 |      | C14 H18 N2 O3      | 262.13202 | 10.113   |
| Level 4                 |      | C14 H18 N2 O4      | 278.12649 | 11.668   |
| Level 4                 |      | C14 H18 N4 O4      | 306.13319 | 10.577   |
| Level 4                 |      | C14 H18 O3         | 234.12574 | 18.828   |
| Level 4                 |      | C14 H18 O6         | 282.11065 | 11.483   |
| Level 4                 |      | C14 H19 N O2       | 233.14159 | 5.946    |
| Level 4                 |      | C14 H19 N O2       | 233.1415  | 7.442    |
| Level 4                 |      | C14 H19 N O7       | 313.11612 | 11.191   |
| Level 4                 |      | C14 H19 N9 O S2    | 393.11594 | 17.075   |
| Level 4                 |      | C14 H20 F2 N2 O S  | 302.12657 | 11.803   |
| Level 4                 |      | C14 H20 O          | 204.15135 | 14.451   |
| Level 4                 |      | C14 H20 O          | 204.1516  | 17.007   |
| Level 4                 |      | C14 H20 O5         | 268.1313  | 13.361   |
| Level 4                 |      | C14 H21 Cl N5 O6 P | 421.09299 | 15.546   |
| Level 4                 |      | C14 H21 F3 O2      | 278.14947 | 14.912   |
| Level 4                 |      | C14 H21 F3 O2      | 278.14924 | 17.646   |
| Level 4                 |      | C14 H21 N O        | 219.16246 | 8.173    |
| Level 4                 |      | C14 H21 N O        | 219.16255 | 18.698   |
| Level 4                 |      | C14 H21 N O        | 219.16241 | 19.399   |
| Level 4                 |      | C14 H21 N O2       | 235.15721 | 8.483    |
| Level 4                 |      | C14 H21 N O2       | 235.15737 | 20.612   |



| Identification<br>level | Name | Formula                | Calc. MW  | RT [min] |
|-------------------------|------|------------------------|-----------|----------|
| Level 4                 |      | C14 H21 N O3           | 251.15194 | 6.844    |
| Level 4                 |      | C14 H21 N O3           | 251.15199 | 14.922   |
| Level 4                 |      | C14 H21 N O5 S         | 315.11414 | 8.305    |
| Level 4                 |      | C14 H21 N O5 S         | 315.11407 | 13.002   |
| Level 4                 |      | C14 H21 N3 O           | 247.1684  | 7.249    |
| Level 4                 |      | C14 H21 N3 O2          | 263.16371 | 6.771    |
| Level 4                 |      | C14 H21 N9 O S2        | 395.13155 | 16.826   |
| Level 4                 |      | C14 H22 F2 S           | 260.14162 | 15.515   |
| Level 4                 |      | C14 H22 N2 O           | 234.17324 | 12.119   |
| Level 4                 |      | C14 H22 O              | 206.16713 | 16.344   |
| Level 4                 |      | C14 H22 O              | 206.16713 | 16.808   |
| Level 4                 |      | C14 H22 O              | 206.16718 | 17.565   |
| Level 4                 |      | C14 H22 O              | 206.16727 | 17.683   |
| Level 4                 |      | C14 H22 O              | 206.16731 | 18.698   |
| Level 4                 |      | C14 H22 O              | 206.16723 | 19.912   |
| Level 4                 |      | C14 H22 O2             | 222.16215 | 13.789   |
| Level 4                 |      | C14 H22 O2             | 222.16218 | 14.488   |
| Level 4                 |      | C14 H22 O2             | 222.16209 | 14.71    |
| Level 4                 |      | C14 H22 O2             | 222.16199 | 18.979   |
| Level 4                 |      | C14 H22 O3             | 238.15693 | 15.173   |
| Level 4                 |      | C14 H22 O3             | 238.15679 | 15.484   |
| Level 4                 |      | C14 H22 O3             | 238.15679 | 16.033   |
| Level 4                 |      | C14 H22 O3             | 238.15678 | 17.159   |
| Level 4                 |      | C14 H22 O6             | 268.13109 | 11.188   |
| Level 4                 |      | C14 H22 O6             | 268.13108 | 11.427   |
| Level 4                 |      | C14 H22 O6             | 268.1311  | 13.113   |
| Level 4                 |      | C14 H23 Br2 Cl4 O4 P S | 615.81685 | 1.029    |
| Level 4                 |      | C14 H23 F N2 O5        | 318.15835 | 13.843   |
| Level 4                 |      | C14 H23 F O            | 226.17237 | 20.553   |
| Level 4                 |      | C14 H23 F O9           | 354.13277 | 10.809   |
| Level 4                 |      | C14 H23 N O            | 221.17784 | 6.813    |
| Level 4                 |      | C14 H23 N O            | 221.17799 | 18.838   |
| Level 4                 |      | C14 H23 N O2           | 237.17286 | 14.895   |
| Level 4                 |      | C14 H23 N O2           | 237.17281 | 16.844   |
| Level 4                 |      | C14 H23 N O4 S         | 301.13492 | 10.406   |
| Level 4                 |      | C14 H23 N O5 S         | 317.12999 | 13.646   |
| Level 4                 |      | C14 H23 N O5 S         | 317.12984 | 13.935   |
| Level 4                 |      | C14 H23 N8 P S3        | 430.09535 | 18.609   |
| Level 4                 |      | C14 H24 F N3 O3        | 301.17926 | 8.898    |
| Level 4                 |      | C14 H24 F2 N O10 P     | 435.11024 | 11.007   |
| Level 4                 |      | C14 H24 F2 O S         | 278.15194 | 19.392   |
| Level 4                 |      | C14 H24 F2 S           | 262.15716 | 12.624   |
| Level 4                 |      | C14 H24 F7 N3 O3       | 415.16907 | 7.086    |
| Level 4                 |      | C14 H24 N2 O2          | 252.18367 | 8.447    |

| Identification<br>level | Name | Formula            | Calc. MW  | RT [min] |
|-------------------------|------|--------------------|-----------|----------|
| Level 4                 |      | C14 H24 O          | 208.18271 | 18.507   |
| Level 4                 |      | C14 H24 O3         | 262.15318 | 5.28     |
| Level 4                 |      | C14 H24 O3         | 240.17248 | 16.074   |
| Level 4                 |      | C14 H24 O3         | 240.17246 | 16.596   |
| Level 4                 |      | C14 H24 O3         | 222.16199 | 18.544   |
| Level 4                 |      | C14 H24 O3         | 222.16203 | 19.237   |
| Level 4                 |      | C14 H25 F2 N S2    | 309.13981 | 17.394   |
| Level 4                 |      | C14 H25 F3 N3 O3 P | 371.1579  | 10.62    |
| Level 4                 |      | C14 H25 F4 N5      | 339.20466 | 10.676   |
| Level 4                 |      | C14 H25 N4 O P     | 296.17542 | 20.286   |
| Level 4                 |      | C14 H26 F N3 O5    | 335.18474 | 7.721    |
| Level 4                 |      | C14 H26 F P S      | 276.14769 | 10.444   |
| Level 4                 |      | C14 H26 F2 N2 O2 S | 324.16894 | 10.984   |
| Level 4                 |      | C14 H26 N6 O5      | 358.19628 | 14.896   |
| Level 4                 |      | C14 H26 O4         | 258.18311 | 14.56    |
| Level 4                 |      | C14 H26 O6         | 290.17312 | 14.405   |
| Level 4                 |      | C14 H27 F4 N O9    | 429.16352 | 10.763   |
| Level 4                 |      | C14 H27 N O        | 225.2093  | 18.471   |
| Level 4                 |      | C14 H27 N O4       | 273.19393 | 11.862   |
| Level 4                 |      | C14 H27 N O7       | 321.17885 | 4.366    |
| Level 4                 |      | C14 H27 P S        | 258.15778 | 1.67     |
| Level 4                 |      | C14 H28 F3 N3      | 295.22344 | 19.635   |
| Level 4                 |      | C14 H28 N2 O4      | 288.20479 | 5.802    |
| Level 4                 |      | C14 H28 N2 S2      | 288.17    | 16.711   |
| Level 4                 |      | C14 H28 N4 O2      | 284.22116 | 10.574   |
| Level 4                 |      | C14 H29 F2 N S     | 281.19922 | 14.884   |
| Level 4                 |      | C14 H29 F2 N3 O2   | 309.22289 | 14.05    |
| Level 4                 |      | C14 H29 F4 N2 O P  | 348.19473 | 13.765   |
| Level 4                 |      | C14 H29 N O4 S     | 307.18162 | 8.298    |
| Level 4                 |      | C14 H29 N O7       | 323.19445 | 6.146    |
| Level 4                 |      | C14 H29 N O7       | 323.19448 | 11.417   |
| Level 4                 |      | C14 H29 N O8       | 339.18947 | 11.555   |
| Level 4                 |      | C14 H29 N5 O3      | 315.22697 | 10.024   |
| Level 4                 |      | C14 H30 F2 N4 O2   | 324.23384 | 16.992   |
| Level 4                 |      | C14 H30 F4 O10     | 434.1767  | 9.054    |
| Level 4                 |      | C14 H30 F4 O3      | 322.21216 | 21.093   |
| Level 4                 |      | C14 H30 N2 O4      | 290.22075 | 5.711    |
| Level 4                 |      | C14 H30 N2 O4      | 290.22071 | 5.881    |
| Level 4                 |      | C14 H30 N2 O4      | 290.22033 | 8.627    |
| Level 4                 |      | C14 H30 O6         | 294.20444 | 12.745   |
| Level 4                 |      | C14 H30 O9         | 342.18897 | 7.099    |
| Level 4                 |      | C14 H32 F2 N3 P    | 311.23062 | 13.047   |
| Level 4                 |      | C14 H32 F3 P       | 288.21993 | 17.999   |
| Level 4                 |      | C14 H32 N2 O4      | 292.23615 | 5.911    |

| Identification<br>level | Name | Formula               | Calc. MW  | RT [min] |
|-------------------------|------|-----------------------|-----------|----------|
| Level 4                 |      | C14 H32 N2 O6         | 324.22637 | 5.96     |
| Level 4                 |      | C14 H33 F6 N2 O4 P S  | 470.18044 | 7.812    |
| Level 4                 |      | C14 H34 F N O14       | 459.19523 | 7.827    |
| Level 4                 |      | C14 H36 F N O9        | 381.23627 | 13.392   |
| Level 4                 |      | C14 H36 F N O9        | 381.23615 | 15.827   |
| Level 4                 |      | C14 H36 N2 O S3       | 344.19865 | 20.118   |
| Level 4                 |      | C14 H37 F2 N O5 S     | 369.23649 | 13.474   |
| Level 4                 |      | C14 H37 F3 N3 O2 P    | 367.25687 | 13.913   |
| Level 4                 |      | C14 H38 F N O12       | 431.23682 | 8.53     |
| Level 4                 |      | C14 H38 N O P3 S      | 361.18892 | 18.484   |
| Level 4                 |      | C14 H38 N2 O S4       | 378.18661 | 8.335    |
| Level 4                 |      | C14 H39 F7 O S2       | 420.23363 | 15.504   |
| Level 4                 |      | C14 H4 N2 P2          | 261.98488 | 0.91     |
| Level 4                 |      | C14 H40 F4 O7 P2      | 458.21855 | 1.159    |
| Level 4                 |      | C14 H41 F O S3        | 340.22966 | 13.418   |
| Level 4                 |      | C14 H41 F5 N3 O2 P    | 409.28543 | 20.457   |
| Level 4                 |      | C14 H41 N7 O8 S       | 467.27311 | 7.579    |
| Level 4                 |      | C14 H42 F N7 O3 S2    | 439.27828 | 7.464    |
| Level 4                 |      | C14 H42 F O P3        | 338.24335 | 20.502   |
| Level 4                 |      | C14 H43 N7 O8 S       | 469.28932 | 14.154   |
| Level 4                 |      | C14 H45 F3 N2 O P2 S2 | 440.23907 | 14.136   |
| Level 4                 |      | C14 H47 F10 N9 S      | 563.35271 | 17.493   |
| Level 4                 |      | C14 H48 F3 N3 O4 S2   | 443.30397 | 13.404   |
| Level 4                 |      | C14 H49 F2 N2 O2 P S2 | 410.29378 | 20.596   |
| Level 4                 |      | C14 H49 F2 N7 O5 S2   | 497.32041 | 16.236   |
| Level 4                 |      | C14 H6 F N O3         | 255.03277 | 14.552   |
| Level 4                 |      | C14 H8 O3             | 224.04754 | 13.504   |
| Level 4                 |      | C14 H9 N O            | 207.06848 | 13.806   |
| Level 4                 |      | C14 H9 N O2           | 223.0633  | 13.88    |
| Level 4                 |      | C15 H10 F8 O          | 358.06012 | 10.361   |
| Level 4                 |      | C15 H11 N3 O          | 249.08619 | 3.861    |
| Level 4                 |      | C15 H12 F N O2 S      | 289.05774 | 13.359   |
| Level 4                 |      | C15 H12 F2 N4         | 286.10265 | 9.001    |
| Level 4                 |      | C15 H12 N2 O          | 236.09504 | 12.443   |
| Level 4                 |      | C15 H12 N6            | 276.1114  | 9.636    |
| Level 4                 |      | C15 H12 N6            | 276.11246 | 16.97    |
| Level 4                 |      | C15 H13 F O           | 228.09753 | 7.884    |
| Level 4                 |      | C15 H13 F O           | 228.09745 | 8.145    |
| Level 4                 |      | C15 H13 F O           | 228.09762 | 8.467    |
| Level 4                 |      | C15 H13 F O           | 228.0976  | 8.726    |
| Level 4                 |      | C15 H13 F O           | 228.09728 | 9.119    |
| Level 4                 |      | C15 H13 N O2          | 239.09463 | 4.799    |
| Level 4                 |      | C15 H13 N3 O3         | 278.1366  | 11.333   |
| Level 4                 |      | C15 H14 Cl N O3 S     | 323.03863 | 12.809   |

| Identification<br>level | Name | Formula           | Calc. MW  | RT [min] |
|-------------------------|------|-------------------|-----------|----------|
| Level 4                 |      | C15 H14 N2 O      | 238.11071 | 8.654    |
| Level 4                 |      | C15 H14 N2 O3     | 270.10071 | 10.106   |
| Level 4                 |      | C15 H14 N4 O2     | 282.1106  | 7.979    |
| Level 4                 |      | C15 H15 N O       | 225.11541 | 16.865   |
| Level 4                 |      | C15 H15 N O3      | 257.10532 | 6.762    |
| Level 4                 |      | C15 H15 N3 O4     | 301.1064  | 12.096   |
| Level 4                 |      | C15 H16 F N7 S3   | 409.06178 | 18.114   |
| Level 4                 |      | C15 H16 F2 N4     | 290.1339  | 6.595    |
| Level 4                 |      | C15 H16 N2 O      | 240.12642 | 14.725   |
| Level 4                 |      | C15 H16 N2 O2     | 294.07861 | 5.071    |
| Level 4                 |      | C15 H16 N2 O2     | 256.1211  | 14.628   |
| Level 4                 |      | C15 H16 N4 O3     | 300.11864 | 10.233   |
| Level 4                 |      | C15 H16 N4 O3     | 300.11867 | 10.589   |
| Level 4                 |      | C15 H16 N4 O3     | 300.11858 | 11.146   |
| Level 4                 |      | C15 H16 N4 O3     | 278.13641 | 11.148   |
| Level 4                 |      | C15 H16 N4 O3     | 300.11834 | 11.335   |
| Level 4                 |      | C15 H16 O3        | 244.11005 | 16.596   |
| Level 4                 |      | C15 H17 Cl N2 O2  | 292.09797 | 17.397   |
| Level 4                 |      | C15 H17 F2 N O5 S | 361.08071 | 12.4     |
| Level 4                 |      | C15 H17 F3 N2 O4  | 346.11405 | 12.055   |
| Level 4                 |      | C15 H17 F9 O10 P2 | 590.01531 | 15.336   |
| Level 4                 |      | C15 H17 N O2      | 243.12622 | 6.889    |
| Level 4                 |      | C15 H17 N O3 S    | 291.09658 | 5.035    |
| Level 4                 |      | C15 H17 N3 O5     | 319.11679 | 9.767    |
| Level 4                 |      | C15 H18 N2 O2     | 258.13676 | 10.635   |
| Level 4                 |      | C15 H18 N2 O4     | 290.1267  | 7.287    |
| Level 4                 |      | C15 H18 N2 O4     | 290.12666 | 7.531    |
| Level 4                 |      | C15 H18 N3 O P    | 287.11932 | 11.532   |
| Level 4                 |      | C15 H18 N3 O2 P   | 303.11382 | 11.325   |
| Level 4                 |      | C15 H18 N4 O2     | 286.13884 | 11.125   |
| Level 4                 |      | C15 H18 N4 O2     | 286.13926 | 11.505   |
| Level 4                 |      | C15 H18 N6 O S2   | 362.09747 | 10.739   |
| Level 4                 |      | C15 H18 O5        | 260.10216 | 6.908    |
| Level 4                 |      | C15 H18 S         | 230.11289 | 8.263    |
| Level 4                 |      | C15 H19 Cl N2 O2  | 294.11392 | 15.006   |
| Level 4                 |      | C15 H19 N3 O4 S   | 337.10972 | 11.873   |
| Level 4                 |      | C15 H19 N4 P      | 286.13376 | 17.374   |
| Level 4                 |      | C15 H19 N5 O3     | 317.14876 | 11.769   |
| Level 4                 |      | C15 H19 N6 O P S  | 362.108   | 18.61    |
| Level 4                 |      | C15 H19 P S       | 262.09529 | 5.307    |
| Level 4                 |      | C15 H20 F2 O S    | 286.12053 | 16.245   |
| Level 4                 |      | C15 H20 F3 N3 S   | 331.13317 | 11.513   |
| Level 4                 |      | C15 H20 N2 O2     | 260.15264 | 11.49    |
| Level 4                 |      | C15 H20 N2 O3     | 276.14761 | 11.636   |

| Identification<br>level | Name | Formula          | Calc. MW  | RT [min] |
|-------------------------|------|------------------|-----------|----------|
| Level 4                 |      | C15 H20 O2       | 232.14652 | 15.682   |
| Level 4                 |      | C15 H20 O2       | 232.14643 | 18.438   |
| Level 4                 |      | C15 H21 F3 O     | 274.1546  | 17.703   |
| Level 4                 |      | C15 H21 F3 O2    | 290.14911 | 16.733   |
| Level 4                 |      | C15 H21 N O2     | 247.15719 | 8.47     |
| Level 4                 |      | C15 H21 N O3     | 263.15217 | 4.657    |
| Level 4                 |      | C15 H21 N3 O4 S  | 339.12541 | 12.621   |
| Level 4                 |      | C15 H22 N2 O     | 268.15218 | 6.6      |
| Level 4                 |      | C15 H22 N2 O     | 268.1522  | 6.72     |
| Level 4                 |      | C15 H22 N2 O S2  | 310.11669 | 5.227    |
| Level 4                 |      | C15 H22 N2 O2    | 262.16815 | 6.158    |
| Level 4                 |      | C15 H22 N2 O2    | 262.16813 | 6.691    |
| Level 4                 |      | C15 H22 N2 O5    | 332.13484 | 9.591    |
| Level 4                 |      | C15 H22 O3       | 272.13722 | 4.938    |
| Level 4                 |      | C15 H22 O3       | 250.1566  | 11.549   |
| Level 4                 |      | C15 H22 O3       | 250.15688 | 16.304   |
| Level 4                 |      | C15 H22 O3       | 272.14138 | 16.319   |
| Level 4                 |      | C15 H22 O3       | 268.16737 | 16.725   |
| Level 4                 |      | C15 H22 O4       | 266.15174 | 17.299   |
| Level 4                 |      | C15 H22 O6       | 298.13973 | 5.903    |
| Level 4                 |      | C15 H23 F4 N5 O5 | 429.16338 | 10.642   |
| Level 4                 |      | C15 H23 N O2     | 249.17285 | 7.701    |
| Level 4                 |      | C15 H23 N O3     | 265.16792 | 6.126    |
| Level 4                 |      | C15 H23 N O3     | 265.168   | 6.727    |
| Level 4                 |      | C15 H23 N O5     | 297.1578  | 7.443    |
| Level 4                 |      | C15 H23 N O5 S   | 329.12982 | 13.92    |
| Level 4                 |      | C15 H23 N O7 S   | 361.11955 | 9.859    |
| Level 4                 |      | C15 H24          | 204.18772 | 20.934   |
| Level 4                 |      | C15 H24 F2 S     | 274.15702 | 18.932   |
| Level 4                 |      | C15 H24 N4 O3    | 308.18355 | 12.14    |
| Level 4                 |      | C15 H24 O S      | 252.15477 | 18.777   |
| Level 4                 |      | C15 H24 O2       | 236.17753 | 17.342   |
| Level 4                 |      | C15 H24 O2       | 218.16723 | 17.771   |
| Level 4                 |      | C15 H24 O2       | 236.17749 | 18.775   |
| Level 4                 |      | C15 H24 O3       | 270.18293 | 17.129   |
| Level 4                 |      | C15 H24 O3       | 220.14614 | 18.2     |
| Level 4                 |      | C15 H24 O4       | 268.16736 | 17.077   |
| Level 4                 |      | C15 H24 O4       | 268.16737 | 17.722   |
| Level 4                 |      | C15 H25 F O3     | 272.17758 | 19.061   |
| Level 4                 |      | C15 H25 F O4     | 288.17308 | 19.349   |
| Level 4                 |      | C15 H25 F3 N P3  | 369.11473 | 11.979   |
| Level 4                 |      | C15 H25 F3 O2    | 294.18093 | 19.35    |
| Level 4                 |      | C15 H25 F3 O5    | 342.1653  | 12.558   |
| Level 4                 |      | C15 H25 N O      | 235.19354 | 8.018    |

| Identification<br>level | Name | Formula            | Calc. MW  | RT [min] |
|-------------------------|------|--------------------|-----------|----------|
| Level 4                 |      | C15 H25 N O2       | 251.1886  | 18.995   |
| Level 4                 |      | C15 H25 N O5 S     | 331.14528 | 15.054   |
| Level 4                 |      | C15 H25 N6 O P     | 336.18374 | 8.556    |
| Level 4                 |      | C15 H26 N2 O3      | 282.1943  | 9.417    |
| Level 4                 |      | C15 H26 O3         | 254.18807 | 18.832   |
| Level 4                 |      | C15 H26 O3         | 236.17741 | 19.876   |
| Level 4                 |      | C15 H26 O3         | 254.18812 | 19.876   |
| Level 4                 |      | C15 H26 O4         | 308.13894 | 18.342   |
| Level 4                 |      | C15 H26 O4         | 292.16498 | 18.358   |
| Level 4                 |      | C15 H26 O8         | 334.16269 | 10.739   |
| Level 4                 |      | C15 H27 F O3       | 274.1935  | 19.462   |
| Level 4                 |      | C15 H27 F2 N O4 P2 | 385.13716 | 11.042   |
| Level 4                 |      | C15 H27 N O S3     | 333.12488 | 8.078    |
| Level 4                 |      | C15 H27 N O4       | 285.19398 | 16.606   |
| Level 4                 |      | C15 H27 N O4       | 285.19391 | 16.745   |
| Level 4                 |      | C15 H27 N O5       | 301.18885 | 17.11    |
| Level 4                 |      | C15 H27 N3 O7      | 361.18477 | 4.07     |
| Level 4                 |      | C15 H27 N3 O7      | 361.18478 | 5.228    |
| Level 4                 |      | C15 H28 O7         | 320.1831  | 12.81    |
| Level 4                 |      | C15 H28 O7         | 342.16519 | 13.015   |
| Level 4                 |      | C15 H28 O8         | 336.17809 | 12.652   |
| Level 4                 |      | C15 H28 O8         | 336.17812 | 12.813   |
| Level 4                 |      | C15 H28 O8         | 336.1785  | 13.007   |
| Level 4                 |      | C15 H28 O8         | 336.17813 | 13.378   |
| Level 4                 |      | C15 H29 N O8       | 351.18937 | 5.09     |
| Level 4                 |      | C15 H29 N O8       | 351.18937 | 12.723   |
| Level 4                 |      | C15 H30 F N P2     | 305.18359 | 13.021   |
| Level 4                 |      | C15 H30 F P3       | 322.15324 | 11.111   |
| Level 4                 |      | C15 H30 F2 N4 O3 S | 384.1995  | 7.267    |
| Level 4                 |      | C15 H30 O10        | 370.1839  | 7.832    |
| Level 4                 |      | C15 H30 O6         | 306.20393 | 13.288   |
| Level 4                 |      | C15 H30 O6         | 306.20423 | 15.969   |
| Level 4                 |      | C15 H30 O6         | 306.20422 | 16.695   |
| Level 4                 |      | C15 H30 O6         | 306.20422 | 16.803   |
| Level 4                 |      | C15 H30 O7         | 322.19944 | 13.421   |
| Level 4                 |      | C15 H30 O7         | 322.19907 | 13.555   |
| Level 4                 |      | C15 H31 F N2 O7    | 370.21173 | 16.363   |
| Level 4                 |      | C15 H31 N O11      | 401.1899  | 7.429    |
| Level 4                 |      | C15 H31 N O7       | 337.21004 | 12.797   |
| Level 4                 |      | C15 H31 N O7       | 337.21019 | 13.018   |
| Level 4                 |      | C15 H31 N O8       | 353.20515 | 12.646   |
| Level 4                 |      | C15 H31 N O8       | 353.20507 | 12.816   |
| Level 4                 |      | C15 H31 N O8       | 353.20464 | 13.011   |
| Level 4                 |      | C15 H31 N O8       | 353.20454 | 13.281   |

| Identification<br>level | Name | Formula              | Calc. MW  | RT [min] |
|-------------------------|------|----------------------|-----------|----------|
| Level 4                 |      | C15 H32 F N O9       | 389.20657 | 11.429   |
| Level 4                 |      | C15 H32 N2 O2 S      | 304.21842 | 8.83     |
| Level 4                 |      | C15 H32 O9           | 356.20454 | 8.468    |
| Level 4                 |      | C15 H33 F P2         | 294.20418 | 12.594   |
| Level 4                 |      | C15 H33 F2 N O2 S    | 329.21974 | 7.883    |
| Level 4                 |      | C15 H33 N O10        | 387.21049 | 7.835    |
| Level 4                 |      | C15 H33 N O6         | 323.23083 | 13.289   |
| Level 4                 |      | C15 H33 N O6         | 323.23093 | 16.696   |
| Level 4                 |      | C15 H33 N O6         | 323.23093 | 16.806   |
| Level 4                 |      | C15 H33 N O7         | 339.22543 | 13.298   |
| Level 4                 |      | C15 H33 N O7         | 339.22589 | 13.525   |
| Level 4                 |      | C15 H33 N O7         | 339.22597 | 13.884   |
| Level 4                 |      | C15 H33 N O7         | 339.22599 | 14.459   |
| Level 4                 |      | C15 H34 F N P2       | 309.21491 | 10.881   |
| Level 4                 |      | C15 H34 F N2 O2 P    | 324.23431 | 16.897   |
| Level 4                 |      | C15 H34 F N4 P S     | 352.22258 | 17.813   |
| Level 4                 |      | C15 H34 F3 N2 P      | 330.24114 | 18.095   |
| Level 4                 |      | C15 H35 N O2 S2      | 325.21027 | 12.191   |
| Level 4                 |      | C15 H35 N O6         | 325.24646 | 14.078   |
| Level 4                 |      | C15 H35 N O9         | 373.23117 | 8.344    |
| Level 4                 |      | C15 H35 N O9         | 373.23119 | 8.468    |
| Level 4                 |      | C15 H36 F N O10      | 409.23144 | 14.472   |
| Level 4                 |      | C15 H37 F N9 O4 P S3 | 553.18448 | 8.662    |
| Level 4                 |      | C15 H37 F2 N O3 S    | 349.24651 | 17.303   |
| Level 4                 |      | C15 H37 F2 N O4 S    | 365.24123 | 6.54     |
| Level 4                 |      | C15 H37 N O S2       | 311.23113 | 12.692   |
| Level 4                 |      | C15 H38 F N O8       | 379.25702 | 17.133   |
| Level 4                 |      | C15 H39 F2 N O4 P2   | 397.23137 | 13.571   |
| Level 4                 |      | C15 H39 F3 N3 O4 P   | 413.26232 | 13.242   |
| Level 4                 |      | C15 H39 F5 O7        | 426.26021 | 18.079   |
| Level 4                 |      | C15 H40 F3 N P2 S    | 385.23121 | 10.346   |
| Level 4                 |      | C15 H40 F3 N4 O2 P   | 396.28481 | 10.854   |
| Level 4                 |      | C15 H40 N9 O5 P      | 457.28874 | 13.652   |
| Level 4                 |      | C15 H43 F3 N2 O4 S   | 404.29042 | 20.59    |
| Level 4                 |      | C15 H43 F6 N5 S      | 439.3141  | 20.943   |
| Level 4                 |      | C15 H44 F O2 P S3    | 402.22341 | 15.329   |
| Level 4                 |      | C15 H45 F3 N9 P3 S   | 533.26883 | 9.303    |
| Level 4                 |      | C15 H46 N2 O12       | 446.30482 | 20.648   |
| Level 4                 |      | C15 H46 N5 O3 P S2   | 439.2782  | 16.938   |
| Level 4                 |      | C15 H48 N6 O S4      | 456.2769  | 15.109   |
| Level 4                 |      | C15 H6 Cl2 F O3 P3 S | 447.86131 | 12.565   |
| Level 4                 |      | C15 H6 F3 N8 O10 P   | 545.9893  | 15.067   |
| Level 4                 |      | C16 H10 Br3 Cl2 N5   | 578.78618 | 0.861    |
| Level 4                 |      | C16 H10 N2 O2        | 262.07445 | 13.342   |

| Identification<br>level | Name | Formula           | Calc. MW  | RT [min] |
|-------------------------|------|-------------------|-----------|----------|
| Level 4                 |      | C16 H13 F2 P      | 274.0717  | 12.463   |
| Level 4                 |      | C16 H14 N2 O3     | 282.10051 | 9.431    |
| Level 4                 |      | C16 H14 N2 O3     | 282.10081 | 12.808   |
| Level 4                 |      | C16 H14 N4 O S    | 332.07192 | 5.086    |
| Level 4                 |      | C16 H14 O2        | 238.09946 | 15.396   |
| Level 4                 |      | C16 H15 F2 N3 Si  | 315.10438 | 12.731   |
| Level 4                 |      | C16 H15 F2 O P    | 292.08255 | 11.963   |
| Level 4                 |      | C16 H15 F2 P      | 276.08754 | 12.447   |
| Level 4                 |      | C16 H16 S         | 240.09696 | 10.001   |
| Level 4                 |      | C16 H17 N O3      | 271.12068 | 16.247   |
| Level 4                 |      | C16 H17 N O4      | 287.1156  | 4.774    |
| Level 4                 |      | C16 H17 N O4      | 287.11585 | 5.73     |
| Level 4                 |      | C16 H17 N O4      | 287.116   | 7.01     |
| Level 4                 |      | C16 H17 N3 O4     | 337.10411 | 9.816    |
| Level 4                 |      | C16 H18 N2 O2     | 270.1369  | 7.257    |
| Level 4                 |      | C16 H18 N3 O4 P   | 347.10398 | 8.633    |
| Level 4                 |      | C16 H18 O2        | 242.13101 | 15.656   |
| Level 4                 |      | C16 H19 N         | 225.15167 | 9.374    |
| Level 4                 |      | C16 H20 F2 O S    | 298.12047 | 14.031   |
| Level 4                 |      | C16 H20 O3        | 260.14155 | 15.173   |
| Level 4                 |      | C16 H20 O4        | 298.11631 | 2.493    |
| Level 4                 |      | C16 H21 F P2      | 294.11031 | 14.826   |
| Level 4                 |      | C16 H21 N O       | 243.16269 | 8.524    |
| Level 4                 |      | C16 H21 N O       | 243.16247 | 10.218   |
| Level 4                 |      | C16 H21 N O2      | 259.15724 | 12.914   |
| Level 4                 |      | C16 H21 N O4      | 291.14719 | 6.636    |
| Level 4                 |      | C16 H21 N5 O S    | 331.14555 | 14.176   |
| Level 4                 |      | C16 H22 N2 O3     | 290.16363 | 8.274    |
| Level 4                 |      | C16 H22 N2 O4     | 306.15837 | 6.981    |
| Level 4                 |      | C16 H22 N2 O4     | 306.15831 | 11.269   |
| Level 4                 |      | C16 H22 N2 O4     | 306.15859 | 12.01    |
| Level 4                 |      | C16 H22 N2 O4     | 288.14758 | 14.767   |
| Level 4                 |      | C16 H22 O         | 230.16728 | 17.166   |
| Level 4                 |      | C16 H22 O2        | 246.1622  | 14.16    |
| Level 4                 |      | C16 H22 O2        | 246.16213 | 14.472   |
| Level 4                 |      | C16 H22 O2        | 246.16208 | 14.733   |
| Level 4                 |      | C16 H22 O3        | 262.1572  | 13.277   |
| Level 4                 |      | C16 H22 O3        | 262.15691 | 15.188   |
| Level 4                 |      | C16 H22 O5        | 294.14702 | 9.693    |
| Level 4                 |      | C16 H23 F N O6 P  | 375.12554 | 13.954   |
| Level 4                 |      | C16 H23 F2 N O S  | 315.14734 | 6.691    |
| Level 4                 |      | C16 H23 F2 O4 P S | 380.10232 | 16.755   |
| Level 4                 |      | C16 H23 F3 O      | 288.17018 | 19.051   |
| Level 4                 |      | C16 H23 F3 O2     | 304.16518 | 14.843   |



| Identification<br>level | Name | Formula               | Calc. MW  | RT [min] |
|-------------------------|------|-----------------------|-----------|----------|
| Level 4                 |      | C16 H23 N O           | 245.17826 | 6.661    |
| Level 4                 |      | C16 H23 O P S         | 294.12072 | 18.61    |
| Level 4                 |      | C16 H24 F N3 O2       | 309.18447 | 17.942   |
| Level 4                 |      | C16 H24 N2 O2         | 276.18403 | 11.314   |
| Level 4                 |      | C16 H24 N2 O2         | 276.18384 | 11.782   |
| Level 4                 |      | C16 H24 N2 O5         | 324.16898 | 12.373   |
| Level 4                 |      | C16 H24 O             | 232.18281 | 19.141   |
| Level 4                 |      | C16 H24 O             | 232.18283 | 19.745   |
| Level 4                 |      | C16 H24 O3            | 264.17264 | 15.067   |
| Level 4                 |      | C16 H24 O3            | 286.15476 | 15.367   |
| Level 4                 |      | C16 H24 O3            | 264.17245 | 18.613   |
| Level 4                 |      | C16 H24 O4            | 302.15206 | 15.826   |
| Level 4                 |      | C16 H24 O4            | 302.15201 | 16.181   |
| Level 4                 |      | C16 H24 O4            | 302.15212 | 16.946   |
| Level 4                 |      | C16 H24 O5            | 318.14718 | 14.547   |
| Level 4                 |      | C16 H24 O5            | 318.14727 | 14.688   |
| Level 4                 |      | C16 H25 N O3          | 279.18347 | 7.81     |
| Level 4                 |      | C16 H25 N O3          | 279.18323 | 10.312   |
| Level 4                 |      | C16 H25 N3 O4         | 323.18456 | 11.665   |
| Level 4                 |      | C16 H26 F2 N O8 P     | 429.13652 | 12.426   |
| Level 4                 |      | C16 H26 F2 N6 O2 P2 S | 466.12872 | 8.971    |
| Level 4                 |      | C16 H26 F3 N3 O2 S2   | 413.14096 | 11.718   |
| Level 4                 |      | C16 H26 F3 O2 P       | 338.16298 | 10.3     |
| Level 4                 |      | C16 H26 N2 O5         | 308.17399 | 11.756   |
| Level 4                 |      | C16 H26 N2 O5         | 308.174   | 12.674   |
| Level 4                 |      | C16 H26 O2            | 250.19327 | 16.642   |
| Level 4                 |      | C16 H26 O2            | 250.19331 | 19.294   |
| Level 4                 |      | C16 H26 O3            | 248.1776  | 15.694   |
| Level 4                 |      | C16 H26 O3            | 248.17762 | 16.229   |
| Level 4                 |      | C16 H26 O3            | 248.1776  | 16.68    |
| Level 4                 |      | C16 H26 O3            | 248.17767 | 16.782   |
| Level 4                 |      | C16 H26 O3            | 248.1776  | 17.044   |
| Level 4                 |      | C16 H26 O3            | 248.17757 | 17.403   |
| Level 4                 |      | C16 H26 O3            | 248.17765 | 17.831   |
| Level 4                 |      | C16 H26 O3            | 266.18806 | 18.24    |
| Level 4                 |      | C16 H26 O4            | 299.20996 | 14.217   |
| Level 4                 |      | C16 H26 O4            | 264.17258 | 14.844   |
| Level 4                 |      | C16 H26 O5            | 298.17802 | 17.752   |
| Level 4                 |      | C16 H27 N O           | 249.2095  | 9.239    |
| Level 4                 |      | C16 H27 N O2          | 265.20429 | 16.779   |
| Level 4                 |      | C16 H27 N O2          | 265.20433 | 17.364   |
| Level 4                 |      | C16 H28 F N O11       | 429.16357 | 12.453   |
| Level 4                 |      | C16 H28 F N10 O4 P    | 474.20165 | 12.63    |
| Level 4                 |      | C16 H28 O3            | 268.20369 | 18.831   |

| Identification<br>level | Name | Formula                | Calc. MW  | RT [min] |
|-------------------------|------|------------------------|-----------|----------|
| Level 4                 |      | C16 H28 O4             | 284.1987  | 17.105   |
| Level 4                 |      | C16 H29 F2 N O S       | 321.19439 | 16.738   |
| Level 4                 |      | C16 H29 F3 O S2        | 358.16054 | 13.545   |
| Level 4                 |      | C16 H29 N O3           | 283.21465 | 16.979   |
| Level 4                 |      | C16 H30 Cl F2 N P2     | 371.15119 | 12.085   |
| Level 4                 |      | C16 H30 Cl F3 N2 O2 P2 | 436.14156 | 13.752   |
| Level 4                 |      | C16 H30 F N P2         | 317.18383 | 16.787   |
| Level 4                 |      | C16 H30 F2 N2 O4 P2    | 414.16579 | 13.914   |
| Level 4                 |      | C16 H30 F2 O S         | 308.19892 | 16.76    |
| Level 4                 |      | C16 H31 F2 N S         | 307.21468 | 19.047   |
| Level 4                 |      | C16 H31 N S2           | 301.18884 | 18.027   |
| Level 4                 |      | C16 H32 F2 S           | 294.21973 | 17.653   |
| Level 4                 |      | C16 H32 O6             | 320.21982 | 14.78    |
| Level 4                 |      | C16 H33 F S3           | 340.17337 | 7.355    |
| Level 4                 |      | C16 H33 N O8           | 367.22062 | 12.033   |
| Level 4                 |      | C16 H33 N O9           | 383.21559 | 12.388   |
| Level 4                 |      | C16 H33 N7 O4 S        | 419.23075 | 20.73    |
| Level 4                 |      | C16 H34 F2 N3 O5 P3    | 479.16782 | 7.316    |
| Level 4                 |      | C16 H35 N              | 241.27691 | 12.096   |
| Level 4                 |      | C16 H38 F3 N O6 P2 S   | 491.18394 | 12.626   |
| Level 4                 |      | C16 H39 F2 N O S3      | 395.21589 | 13.626   |
| Level 4                 |      | C16 H39 N O S2         | 325.24646 | 15.207   |
| Level 4                 |      | C16 H4 F2 N2 S2        | 325.97775 | 5.59     |
| Level 4                 |      | C16 H4 N8              | 308.05646 | 11.956   |
| Level 4                 |      | C16 H40 F11 N3         | 483.30462 | 15.234   |
| Level 4                 |      | C16 H41 F2 N O7 P2     | 459.23165 | 7.642    |
| Level 4                 |      | C16 H41 F2 N O8 S      | 445.25226 | 8.401    |
| Level 4                 |      | C16 H42 F N O13        | 475.26314 | 9.135    |
| Level 4                 |      | C16 H42 F2 O P2 S      | 382.24004 | 13.385   |
| Level 4                 |      | C16 H44 N9 O2 P S2     | 489.27852 | 9.164    |
| Level 4                 |      | C16 H46 F3 N O7 S      | 453.29378 | 15.939   |
| Level 4                 |      | C16 H46 N8 S           | 382.35598 | 20.104   |
| Level 4                 |      | C16 H49 F10 N9 O S     | 605.36223 | 14.274   |
| Level 4                 |      | C16 H49 F5 N O7 P      | 493.31755 | 21.321   |
| Level 4                 |      | C16 H49 F6 N O10 P2    | 591.2744  | 9.499    |
| Level 4                 |      | C16 H49 N7 O3 S3       | 483.30474 | 17.014   |
| Level 4                 |      | C16 H50 F5 N O8        | 479.34601 | 11.391   |
| Level 4                 |      | C16 H51 F N9 O8 P      | 547.35684 | 10.534   |
| Level 4                 |      | C16 H51 F7 N3 O5 P     | 529.34538 | 15.862   |
| Level 4                 |      | C16 H51 F7 N3 O7 P     | 561.33583 | 13.969   |
| Level 4                 |      | C16 H51 F7 N3 O8 P     | 577.33146 | 10.106   |
| Level 4                 |      | C16 H53 N7 O6 S3       | 535.32108 | 9.686    |
| Level 4                 |      | C16 H54 Cl F6 N9 S2    | 585.35478 | 15.577   |
| Level 4                 |      | C16 H55 F3 N10 O6 S    | 572.39672 | 18.288   |

| Identification<br>level | Name | Formula           | Calc. MW  | RT [min] |
|-------------------------|------|-------------------|-----------|----------|
| Level 4                 |      | C16 H56 N O7 P3   | 467.32729 | 21.262   |
| Level 4                 |      | C16 H56 N P S4    | 421.30468 | 17.216   |
| Level 4                 |      | C16 H8 Br2 S4     | 485.78826 | 1.051    |
| Level 4                 |      | C17 H11 F O       | 250.07902 | 7.888    |
| Level 4                 |      | C17 H11 F3        | 272.0811  | 14.542   |
| Level 4                 |      | C17 H12 Cl N5 O2  | 353.06435 | 13.57    |
| Level 4                 |      | C17 H13 F8 N O    | 399.08671 | 12.853   |
| Level 4                 |      | C17 H15 F N2 S    | 298.09316 | 11.643   |
| Level 4                 |      | C17 H15 F9        | 390.10356 | 19.389   |
| Level 4                 |      | C17 H15 N5 O      | 305.12776 | 9.247    |
| Level 4                 |      | C17 H16 N2 O6     | 344.10076 | 15.203   |
| Level 4                 |      | C17 H17 N3 O S    | 311.10927 | 10.986   |
| Level 4                 |      | C17 H17 N3 O4 S   | 359.09398 | 11.773   |
| Level 4                 |      | C17 H18 N2 O6     | 346.11629 | 15.927   |
| Level 4                 |      | C17 H18 N2 O6     | 314.0901  | 15.927   |
| Level 4                 |      | C17 H19 Cl N2 S   | 318.09271 | 5.527    |
| Level 4                 |      | C17 H19 N O       | 253.14304 | 12.612   |
| Level 4                 |      | C17 H19 N S2      | 301.09855 | 11.63    |
| Level 4                 |      | C17 H19 N5 O      | 309.15759 | 9.433    |
| Level 4                 |      | C17 H20 F7 N O S  | 419.11514 | 12.325   |
| Level 4                 |      | C17 H20 N2 O      | 268.15341 | 9.138    |
| Level 4                 |      | C17 H20 N2 O S    | 300.12981 | 10.992   |
| Level 4                 |      | C17 H21 N3 O3     | 315.15834 | 11.964   |
| Level 4                 |      | C17 H22 F5 N P2 S | 429.08567 | 10.644   |
| Level 4                 |      | C17 H22 N4 O4 S   | 378.13261 | 19.265   |
| Level 4                 |      | C17 H22 O         | 242.16696 | 19.235   |
| Level 4                 |      | C17 H22 O2        | 258.16228 | 18.292   |
| Level 4                 |      | C17 H23 N O2      | 273.17305 | 8.28     |
| Level 4                 |      | C17 H23 N O4      | 305.16258 | 8.3      |
| Level 4                 |      | C17 H24 F2 S      | 298.15672 | 14.07    |
| Level 4                 |      | C17 H24 O8        | 356.15026 | 19.271   |
| Level 4                 |      | C17 H25 N O2      | 275.18897 | 8.572    |
| Level 4                 |      | C17 H25 N O5      | 323.17302 | 7.48     |
| Level 4                 |      | C17 H25 N3 O4     | 357.16867 | 10.849   |
| Level 4                 |      | C17 H26 F2 S      | 300.1726  | 13.441   |
| Level 4                 |      | C17 H27 F4 N5 O6  | 473.18978 | 13.02    |
| Level 4                 |      | C17 H27 N O2      | 277.20434 | 10.327   |
| Level 4                 |      | C17 H27 N O2      | 277.20465 | 10.774   |
| Level 4                 |      | C17 H27 N3 O3     | 321.2053  | 7.23     |
| Level 4                 |      | C17 H27 N5 O4     | 365.20486 | 5.654    |
| Level 4                 |      | C17 H28 N2 S2     | 324.16895 | 12.523   |
| Level 4                 |      | C17 H28 O3        | 302.18867 | 16.023   |
| Level 4                 |      | C17 H29 F3 O7     | 402.18671 | 13.577   |
| Level 4                 |      | C17 H29 N O5 S    | 359.17656 | 16.779   |

| Identification<br>level | Name | Formula            | Calc. MW  | RT [min] |
|-------------------------|------|--------------------|-----------|----------|
| Level 4                 |      | C17 H29 N5 O4      | 367.22066 | 6.907    |
| Level 4                 |      | C17 H31 N O5       | 329.21987 | 7.612    |
| Level 4                 |      | C17 H32 F N O2 P2  | 363.18938 | 5.316    |
| Level 4                 |      | C17 H32 O4         | 300.23009 | 21.093   |
| Level 4                 |      | C17 H32 O4         | 300.23014 | 21.312   |
| Level 4                 |      | C17 H33 N O4       | 315.24086 | 17.121   |
| Level 4                 |      | C17 H33 N O8       | 379.2206  | 6.247    |
| Level 4                 |      | C17 H33 O2 P S2    | 364.16564 | 16.752   |
| Level 4                 |      | C17 H34 O4         | 324.22768 | 21.654   |
| Level 4                 |      | C17 H35 F O4 P2    | 384.19979 | 7.397    |
| Level 4                 |      | C17 H35 F3 N2 O5   | 404.25107 | 7.751    |
| Level 4                 |      | C17 H35 N O12      | 445.21619 | 8.152    |
| Level 4                 |      | C17 H35 N9 O4 P2   | 491.22852 | 12.628   |
| Level 4                 |      | C17 H36 F N O3 P2  | 383.21559 | 12.512   |
| Level 4                 |      | C17 H37 N O8       | 383.25204 | 14.02    |
| Level 4                 |      | C17 H38 F N P2     | 337.24624 | 17.158   |
| Level 4                 |      | C17 H38 F2 N O5 P  | 405.24652 | 7.081    |
| Level 4                 |      | C17 H38 N2 O7      | 382.26905 | 7.738    |
| Level 4                 |      | C17 H39 F N10 S4   | 530.22224 | 18.01    |
| Level 4                 |      | C17 H39 F2 N O6 S  | 423.24679 | 6.945    |
| Level 4                 |      | C17 H40 N9 O6 P    | 497.28404 | 8.152    |
| Level 4                 |      | C17 H42 F7 N O4 P2 | 519.24689 | 16.695   |
| Level 4                 |      | C17 H42 N9 O6 P    | 499.29941 | 15.387   |
| Level 4                 |      | C17 H43 F2 N O4 P2 | 425.26252 | 13.798   |
| Level 4                 |      | C17 H43 F8 N7 O2   | 529.33629 | 17.229   |
| Level 4                 |      | C17 H43 N8 O3 P S  | 470.29286 | 16.172   |
| Level 4                 |      | C17 H46 N9 P S2    | 471.30471 | 14.669   |
| Level 4                 |      | C17 H48 F7 N O10 S | 591.28917 | 12.91    |
| Level 4                 |      | C17 H49 F6 N O7 P2 | 555.28969 | 8.473    |
| Level 4                 |      | C17 H50 F8 N4 O8   | 590.3498  | 15.343   |
| Level 4                 |      | C17 H51 N10 O P3   | 504.34606 | 21.346   |
| Level 4                 |      | C17 H53 F2 N5 O10  | 525.37521 | 9.699    |
| Level 4                 |      | C17 H6 F O4 P3 S3  | 481.86339 | 1.041    |
| Level 4                 |      | C18 H12 F4 O2      | 336.07723 | 17.26    |
| Level 4                 |      | C18 H13 F N6 O2    | 364.10749 | 16.909   |
| Level 4                 |      | C18 H13 F N6 O3    | 380.10231 | 17.066   |
| Level 4                 |      | C18 H13 N3 O6      | 367.0801  | 15.497   |
| Level 4                 |      | C18 H15 N O2       | 277.11033 | 11.958   |
| Level 4                 |      | C18 H15 N3 O3      | 321.11479 | 10.801   |
| Level 4                 |      | C18 H18 F3 N O S   | 353.10495 | 12.552   |
| Level 4                 |      | C18 H19 Cl N2 O2 S | 379.10907 | 13.865   |
| Level 4                 |      | C18 H19 F5         | 330.14001 | 12.534   |
| Level 4                 |      | C18 H19 N O4       | 295.12089 | 16.611   |
| Level 4                 |      | C18 H20 N O4 P     | 345.11278 | 12.662   |

| Identification<br>level | Name | Formula            | Calc. MW  | RT [min] |
|-------------------------|------|--------------------|-----------|----------|
| Level 4                 |      | C18 H20 N4 O S     | 362.11893 | 6.577    |
| Level 4                 |      | C18 H20 O6         | 332.12604 | 15.493   |
| Level 4                 |      | C18 H21 F3         | 294.15956 | 20.554   |
| Level 4                 |      | C18 H21 F3 O       | 310.15444 | 19.203   |
| Level 4                 |      | C18 H21 F3 O       | 310.15434 | 19.347   |
| Level 4                 |      | C18 H21 N O2       | 283.15727 | 14.594   |
| Level 4                 |      | C18 H21 O6 P       | 364.10751 | 17.086   |
| Level 4                 |      | C18 H22 B          | 249.18146 | 17.436   |
| Level 4                 |      | C18 H22 N2 O       | 282.17315 | 17.019   |
| Level 4                 |      | C18 H22 N2 O4      | 330.15825 | 15.845   |
| Level 4                 |      | C18 H22 N4 O4      | 358.16047 | 12.646   |
| Level 4                 |      | C18 H22 N4 O4      | 358.16051 | 12.817   |
| Level 4                 |      | C18 H22 N4 O4      | 358.16054 | 13.009   |
| Level 4                 |      | C18 H22 N4 O4      | 358.16012 | 13.258   |
| Level 4                 |      | C18 H22 O2         | 270.15972 | 17.371   |
| Level 4                 |      | C18 H22 O3         | 286.15712 | 16.562   |
| Level 4                 |      | C18 H22 O3         | 286.15677 | 18.283   |
| Level 4                 |      | C18 H22 O4         | 302.15166 | 16.493   |
| Level 4                 |      | C18 H22 O4         | 302.15223 | 17.238   |
| Level 4                 |      | C18 H22 O5         | 300.13341 | 9.198    |
| Level 4                 |      | C18 H23 F3         | 296.17554 | 20.161   |
| Level 4                 |      | C18 H23 N O4       | 317.1629  | 6.505    |
| Level 4                 |      | C18 H23 N O4       | 317.1628  | 7.014    |
| Level 4                 |      | C18 H24 Cl N3 O2   | 349.15564 | 8.63     |
| Level 4                 |      | C18 H24 Cl N3 O3   | 365.15121 | 9.552    |
| Level 4                 |      | C18 H24 O          | 256.18275 | 20.288   |
| Level 4                 |      | C18 H24 O3         | 288.17282 | 17.511   |
| Level 4                 |      | C18 H24 O3         | 305.19914 | 18.636   |
| Level 4                 |      | C18 H24 O3         | 288.17261 | 18.9     |
| Level 4                 |      | C18 H24 O3         | 305.19916 | 19.213   |
| Level 4                 |      | C18 H25 F O8 S     | 420.12433 | 7.078    |
| Level 4                 |      | C18 H25 N O4       | 319.17835 | 15.903   |
| Level 4                 |      | C18 H26            | 242.20359 | 21.403   |
| Level 4                 |      | C18 H26 Cl F N O P | 357.14217 | 10.741   |
| Level 4                 |      | C18 H26 F2 O4      | 344.18096 | 13.697   |
| Level 4                 |      | C18 H26 O          | 258.19868 | 16.89    |
| Level 4                 |      | C18 H26 O3         | 290.18871 | 16.879   |
| Level 4                 |      | C18 H26 O5         | 304.16762 | 18.293   |
| Level 4                 |      | C18 H27 N O2       | 289.20397 | 19.004   |
| Level 4                 |      | C18 H27 N O2       | 289.20422 | 19.095   |
| Level 4                 |      | C18 H27 N O3       | 305.19906 | 19.344   |
| Level 4                 |      | C18 H27 N O4       | 321.19407 | 16.838   |
| Level 4                 |      | C18 H28 F N O6     | 373.18944 | 9.409    |
| Level 4                 |      | C18 H28 O3         | 274.19343 | 18.388   |

| Identification<br>level | Name | Formula              | Calc. MW  | RT [min] |
|-------------------------|------|----------------------|-----------|----------|
| Level 4                 |      | C18 H28 O4           | 308.199   | 16.883   |
| Level 4                 |      | C18 H29 N O2         | 291.21959 | 19.731   |
| Level 4                 |      | C18 H30 N2 O2 S4     | 434.11889 | 12.452   |
| Level 4                 |      | C18 H30 O5           | 343.23612 | 16.577   |
| Level 4                 |      | C18 H30 O5           | 348.1916  | 16.764   |
| Level 4                 |      | C18 H30 O5           | 343.23626 | 16.765   |
| Level 4                 |      | C18 H30 O5           | 343.23626 | 16.883   |
| Level 4                 |      | C18 H30 O5           | 348.1916  | 16.883   |
| Level 4                 |      | C18 H31 F3 N3 O6 P   | 473.18985 | 11.354   |
| Level 4                 |      | C18 H32 F3 N5 O8     | 503.22154 | 8.468    |
| Level 4                 |      | C18 H32 N2 O4        | 340.23617 | 15.245   |
| Level 4                 |      | C18 H32 O4           | 156.11505 | 19.653   |
| Level 4                 |      | C18 H32 O4           | 334.21224 | 19.656   |
| Level 4                 |      | C18 H34 F2 N2 O9     | 460.2223  | 14.355   |
| Level 4                 |      | C18 H34 O5           | 312.23046 | 19.634   |
| Level 4                 |      | C18 H36 O4           | 316.26166 | 20.501   |
| Level 4                 |      | C18 H36 O8           | 380.241   | 15.208   |
| Level 4                 |      | C18 H37 N O8         | 395.25189 | 14.54    |
| Level 4                 |      | C18 H37 N O9         | 411.2467  | 14.551   |
| Level 4                 |      | C18 H37 N O9         | 411.24639 | 14.909   |
| Level 4                 |      | C18 H37 N5 O2 S3     | 451.21126 | 8.106    |
| Level 4                 |      | C18 H38 F N O P2     | 365.2412  | 17.024   |
| Level 4                 |      | C18 H39 N O8         | 397.26775 | 15.122   |
| Level 4                 |      | C18 H4 F17 O9 P3 S4  | 907.76959 | 26.642   |
| Level 4                 |      | C18 H41 N O7         | 383.28834 | 15.62    |
| Level 4                 |      | C18 H42 F N O S3     | 403.24191 | 7.847    |
| Level 4                 |      | C18 H42 F N O16      | 547.24802 | 9.007    |
| Level 4                 |      | C18 H44 N10 O8       | 528.33409 | 17.212   |
| Level 4                 |      | C18 H45 F3 N3 O8 P   | 519.28956 | 9.663    |
| Level 4                 |      | C18 H48 F N O S4     | 441.25902 | 6.793    |
| Level 4                 |      | C18 H48 F2 N3 O3 P3  | 485.28591 | 7.223    |
| Level 4                 |      | C18 H56 F2 N5 O7 P S | 555.36161 | 9.418    |
| Level 4                 |      | C18 H56 N4 O17       | 600.36578 | 15.659   |
| Level 4                 |      | C18 H57 F O5 S3      | 468.33592 | 21.341   |
| Level 4                 |      | C18 H57 F5 N9 O P S2 | 605.37783 | 11.264   |
| Level 4                 |      | C18 H60 F2 N8 O14    | 650.41953 | 14.821   |
| Level 4                 |      | C19 H18 O3           | 294.12327 | 17.648   |
| Level 4                 |      | C19 H19 F4 N O2 S    | 401.10798 | 8.631    |
| Level 4                 |      | C19 H19 N3 O2 S      | 353.11964 | 14.948   |
| Level 4                 |      | C19 H19 N3 O3        | 337.14272 | 8.998    |
| Level 4                 |      | C19 H19 N3 O3 S      | 369.11471 | 11.738   |
| Level 4                 |      | C19 H19 N3 O4 S      | 385.11061 | 12.591   |
| Level 4                 |      | C19 H19 N3 O4 S      | 385.11016 | 12.788   |
| Level 4                 |      | C19 H20 N2 O2        | 308.15248 | 8.844    |

| Identification<br>level | Name | Formula                  | Calc. MW  | RT [min] |
|-------------------------|------|--------------------------|-----------|----------|
| Level 4                 |      | C19 H21 Cl N2 O2 S       | 376.0983  | 5.981    |
| Level 4                 |      | C19 H21 Cl N2 O2 S       | 376.09833 | 6.252    |
| Level 4                 |      | C19 H21 N O              | 279.16231 | 12.002   |
| Level 4                 |      | C19 H21 N3 O2            | 323.1637  | 11.924   |
| Level 4                 |      | C19 H21 N5 O             | 335.17444 | 15       |
| Level 4                 |      | C19 H22 Cl N5 O2         | 387.14623 | 13.088   |
| Level 4                 |      | C19 H22 N2 O3 S          | 358.135   | 10.957   |
| Level 4                 |      | C19 H22 O3               | 298.15716 | 16.367   |
| Level 4                 |      | C19 H23 F3 O2            | 340.16484 | 15.75    |
| Level 4                 |      | C19 H24 O S              | 300.15523 | 13.983   |
| Level 4                 |      | C19 H25 F3 O2            | 342.18072 | 17.108   |
| Level 4                 |      | C19 H25 N3 O             | 311.1997  | 18.458   |
| Level 4                 |      | C19 H26 N2 O             | 298.20522 | 18.649   |
| Level 4                 |      | C19 H26 O4               | 318.18313 | 13.163   |
| Level 4                 |      | C19 H26 O4               | 318.18316 | 15.507   |
| Level 4                 |      | C19 H27 F4 O2 P          | 394.16959 | 16.069   |
| Level 4                 |      | C19 H27 N O              | 285.20969 | 10.689   |
| Level 4                 |      | C19 H28 O7               | 406.14537 | 7.43     |
| Level 4                 |      | C19 H29 F2 N O2 S        | 373.18898 | 8.433    |
| Level 4                 |      | C19 H29 F2 N O4 S2       | 437.15116 | 12.595   |
| Level 4                 |      | C19 H29 N5 O5            | 407.21566 | 6.198    |
| Level 4                 |      | C19 H3 Br N2 O2 P2       | 431.8857  | 1.229    |
| Level 4                 |      | C19 H30 N4 O5            | 384.17577 | 14.908   |
| Level 4                 |      | C19 H30 N4 O5            | 416.20182 | 14.911   |
| Level 4                 |      | C19 H31 F3 O4            | 380.21733 | 20.137   |
| Level 4                 |      | C19 H31 N O2             | 305.2356  | 12.877   |
| Level 4                 |      | C19 H34 O14              | 486.19576 | 17.002   |
| Level 4                 |      | C19 H37 F O3 P2          | 394.21995 | 14.93    |
| Level 4                 |      | C19 H37 F2 N5 O3 S       | 453.25757 | 7.138    |
| Level 4                 |      | C19 H37 F3 N3 P3         | 457.21563 | 1.067    |
| Level 4                 |      | C19 H38 F4 N10 O2 S2     | 578.25505 | 9.265    |
| Level 4                 |      | C19 H39 F N2 O4 S2       | 442.23342 | 17.218   |
| Level 4                 |      | C19 H39 F O5 P2          | 428.22555 | 8.103    |
| Level 4                 |      | C19 H39 N O10            | 441.25743 | 14.105   |
| Level 4                 |      | C19 H39 N3 O S3          | 421.22515 | 20.796   |
| Level 4                 |      | C19 H4 Cl F2 N2 O4 P3 S2 | 553.84711 | 1.044    |
| Level 4                 |      | C19 H41 F5 P2            | 426.26014 | 17.216   |
| Level 4                 |      | C19 H41 N O3 S2          | 395.25188 | 16.687   |
| Level 4                 |      | C19 H51 F4 N O11         | 545.34143 | 14.329   |
| Level 4                 |      | C19 H53 F N5 O3 P3       | 511.33593 | 17.075   |
| Level 4                 |      | C19 H55 N7 O14           | 605.37857 | 14.585   |
| Level 4                 |      | C19 H58 F6 N2 O10 P2     | 650.34739 | 9.863    |
| Level 4                 |      | C19 H63 F3 N10 O6 S      | 616.45885 | 19.389   |
| Level 4                 |      | C19 H64 F5 N10 P S3      | 654.41465 | 11.338   |

| Identification<br>level | Name | Formula               | Calc. MW  | RT [min] |
|-------------------------|------|-----------------------|-----------|----------|
| Level 4                 |      | C2 Cl F5 S            | 185.933   | 0.926    |
| Level 4                 |      | C2 H F N3 O9 P S2     | 324.88762 | 1        |
| Level 4                 |      | C2 H F N4 O2 S        | 163.98042 | 0.992    |
| Level 4                 |      | C2 H F N4 O3 P2 S5    | 369.81048 | 0.945    |
| Level 4                 |      | C2 H F N4 S           | 131.99085 | 0.941    |
| Level 4                 |      | C2 H F N7 O P3        | 250.94376 | 0.955    |
| Level 4                 |      | C2 H F N9 O P3 S      | 310.92146 | 1.034    |
| Level 4                 |      | C2 H F O S2           | 123.94482 | 1.087    |
| Level 4                 |      | C2 H F O11 P2         | 281.89752 | 1.044    |
| Level 4                 |      | C2 H F O7             | 155.97065 | 1.099    |
| Level 4                 |      | C2 H F10 P3 S4        | 435.80136 | 0.967    |
| Level 4                 |      | C2 H F2 N O3 S4       | 252.87987 | 1.004    |
| Level 4                 |      | C2 H F2 N2 O6 P3 S3   | 375.81743 | 1.111    |
| Level 4                 |      | C2 H F2 N4 O9 P3 S3   | 451.80872 | 1.063    |
| Level 4                 |      | C2 H F3 N2 P2 S2      | 235.90119 | 1.054    |
| Level 4                 |      | C2 H F3 O3 P2 S3      | 287.85203 | 1.055    |
| Level 4                 |      | C2 H F3 S             | 113.97494 | 0.986    |
| Level 4                 |      | C2 H F6 O4 P3 S2      | 359.8426  | 1.148    |
| Level 4                 |      | C2 H F7 N7 O2 P3 S3   | 476.84535 | 1.021    |
| Level 4                 |      | C2 H N2 O2 P          | 115.97774 | 0.96     |
| Level 4                 |      | C2 H N4 O4 P3 S3      | 333.83757 | 1.026    |
| Level 4                 |      | C2 H N4 O6 P3         | 269.91112 | 1.126    |
| Level 4                 |      | C2 H N4 O7 P S3       | 319.8745  | 1.032    |
| Level 4                 |      | C2 H2 Cl F3 N O5 P S  | 274.90301 | 0.955    |
| Level 4                 |      | C2 H2 Cl N O3 P2 S3   | 280.83521 | 1.107    |
| Level 4                 |      | C2 H2 Cl2 O S         | 143.92018 | 1.083    |
| Level 4                 |      | C2 H2 Cl3 F2 O4 P     | 263.87298 | 1.082    |
| Level 4                 |      | C2 H2 F N O4 S2       | 186.94053 | 1.016    |
| Level 4                 |      | C2 H2 F O15 P3 S3     | 473.77452 | 0.994    |
| Level 4                 |      | C2 H2 F O4 P S2       | 203.91153 | 0.998    |
| Level 4                 |      | C2 H2 F O4 P3 S       | 233.88651 | 1.065    |
| Level 4                 |      | C2 H2 F3 N2 O7 P3 S2  | 379.84673 | 0.942    |
| Level 4                 |      | C2 H2 F3 N3           | 125.02009 | 1.205    |
| Level 4                 |      | C2 H2 F4 N O4 P3 S2   | 336.85675 | 1.057    |
| Level 4                 |      | C2 H2 F5 N2 O15 P3 S3 | 577.77489 | 1.092    |
| Level 4                 |      | C2 H2 F5 O3 P         | 199.96649 | 0.905    |
| Level 4                 |      | C2 H2 F6 N4 O16 P2 S3 | 609.80086 | 1.016    |
| Level 4                 |      | C2 H2 F7 N O S        | 220.97444 | 0.979    |
| Level 4                 |      | C2 H2 F9 N4 O4 P S3   | 443.88193 | 1.09     |
| Level 4                 |      | C2 H2 N O10 P3        | 292.88923 | 1.044    |
| Level 4                 |      | C2 H2 N O5 P3 S2      | 276.85811 | 1.087    |
| Level 4                 |      | C2 H2 N2 O17 S2       | 389.87947 | 1.049    |
| Level 4                 |      | C2 H2 N3 O P          | 114.9938  | 0.939    |
| Level 4                 |      | C2 H2 N3 O4 P3        | 224.9257  | 0.927    |



| Identification<br>level | Name | Formula               | Calc. MW  | RT [min] |
|-------------------------|------|-----------------------|-----------|----------|
| Level 4                 |      | C2 H2 N4 O P2 S2      | 223.91454 | 1.042    |
| Level 4                 |      | C2 H2 N6 S            | 142.00617 | 1.09     |
| Level 4                 |      | C2 H2 O14 P2 S2       | 375.83666 | 1.017    |
| Level 4                 |      | C2 H3 Br F4 O12       | 373.87438 | 1.021    |
| Level 4                 |      | C2 H3 Cl2 O P3 S2     | 269.82156 | 0.976    |
| Level 4                 |      | C2 H3 Cl3 N2 O        | 175.93095 | 1.063    |
| Level 4                 |      | C2 H3 Cl4 F4 N P2     | 318.843   | 1.08     |
| Level 4                 |      | C2 H3 F N2 O5 S2      | 217.94663 | 0.914    |
| Level 4                 |      | C2 H3 F N2 O5 S2      | 217.947   | 0.992    |
| Level 4                 |      | C2 H3 F N2 S          | 106.00015 | 0.95     |
| Level 4                 |      | C2 H3 F O2 S2         | 141.95546 | 1.089    |
| Level 4                 |      | C2 H3 F O8 S3         | 269.89745 | 1.081    |
| Level 4                 |      | C2 H3 F2 N4 O15 P3 S2 | 517.82182 | 1.137    |
| Level 4                 |      | C2 H3 F3 N O P S3     | 240.9063  | 0.989    |
| Level 4                 |      | C2 H3 F4 N2 O8 P3 S3  | 447.81996 | 1.117    |
| Level 4                 |      | C2 H3 F5 N O P S      | 214.95922 | 1.024    |
| Level 4                 |      | C2 H3 F6 O10 P3 S3    | 489.80049 | 1.007    |
| Level 4                 |      | C2 H3 F7 N2 O2        | 220.00845 | 29.362   |
| Level 4                 |      | C2 H3 N2 O4 P S       | 181.95507 | 0.878    |
| Level 4                 |      | C2 H3 N3 O            | 85.02752  | 1.08     |
| Level 4                 |      | C2 H3 N6 O15 P3 S2    | 507.83146 | 1.028    |
| Level 4                 |      | C2 H3 N8 P3 S2        | 295.9133  | 1.025    |
| Level 4                 |      | C2 H3 O7 P3 S         | 263.8813  | 1.146    |
| Level 4                 |      | C2 H4 Br F4 O2 P      | 245.90684 | 1.111    |
| Level 4                 |      | C2 H4 F N5 S          | 149.01739 | 0.945    |
| Level 4                 |      | C2 H4 F3 O14 P3 S3    | 497.79275 | 0.867    |
| Level 4                 |      | C2 H4 F5 N O10 P2 S3  | 454.83928 | 1.096    |
| Level 4                 |      | C2 H4 F5 O2 P S       | 217.95931 | 0.94     |
| Level 4                 |      | C2 H4 F5 O3 P S2      | 265.92621 | 1.082    |
| Level 4                 |      | C2 H4 F5 O4 P3 S2     | 343.86783 | 1.204    |
| Level 4                 |      | C2 H4 F5 O7 P3 S3     | 423.82491 | 1.128    |
| Level 4                 |      | C2 H4 N3 O2 P         | 133.00439 | 0.942    |
| Level 4                 |      | C2 H4 N4              | 84.04354  | 1.167    |
| Level 4                 |      | C2 H4 N4 O12 P2 S3    | 433.84633 | 1.253    |
| Level 4                 |      | C2 H4 O4 P2 S2        | 217.90313 | 0.979    |
| Level 4                 |      | C2 H5 Cl N2 O2        | 124.00409 | 0.94     |
| Level 4                 |      | C2 H5 F N4 S          | 136.02218 | 0.932    |
| Level 4                 |      | C2 H5 F2 N2 O16 P S3  | 477.85115 | 1.059    |
| Level 4                 |      | C2 H5 F3 O8 S3        | 309.91051 | 1.1      |
| Level 4                 |      | C2 H5 F4 O11 P S2     | 375.89475 | 1.102    |
| Level 4                 |      | C2 H5 N2 O2 P         | 120.00912 | 0.95     |
| Level 4                 |      | C2 H5 N2 O4 P S2      | 215.94314 | 0.848    |
| Level 4                 |      | C2 H5 N3 O2           | 103.03809 | 1.226    |
| Level 4                 |      | C2 H5 N4 P3 S         | 209.94478 | 0.951    |

| Identification<br>level | Name | Formula                 | Calc. MW  | RT [min] |
|-------------------------|------|-------------------------|-----------|----------|
| Level 4                 |      | C2 H6 Br Cl Sn          | 263.83647 | 1.09     |
| Level 4                 |      | C2 H6 Cl2 F4 O2 S2      | 271.91188 | 1.176    |
| Level 4                 |      | C2 H6 F2 N3 O14 P S3    | 460.87178 | 1.076    |
| Level 4                 |      | C2 H6 F3 N O5 S         | 212.99193 | 12.034   |
| Level 4                 |      | C2 H6 N3 O3 P           | 151.01494 | 0.939    |
| Level 4                 |      | C2 H6 N3 P S            | 135.00178 | 1.108    |
| Level 4                 |      | C2 H6 N4 O              | 102.05411 | 1.076    |
| Level 4                 |      | C2 H6 P2 S              | 123.96637 | 0.95     |
| Level 4                 |      | C2 H7 F N4 O4 S2        | 233.98927 | 0.919    |
| Level 4                 |      | C2 H7 F2 O P3 S3        | 273.88369 | 1.063    |
| Level 4                 |      | C2 H7 F2 O3 P3 S3       | 305.87367 | 1.1      |
| Level 4                 |      | C2 H7 N O4 S            | 141.00983 | 1.028    |
| Level 4                 |      | C2 H7 N O6              | 141.02757 | 0.949    |
| Level 4                 |      | C2 H7 N2 O3 P S2        | 201.96364 | 0.916    |
| Level 4                 |      | C2 H7 N2 O3 P3 S2       | 263.91113 | 1.044    |
| Level 4                 |      | C2 H7 N2 O6 P3 S3       | 343.86803 | 1.115    |
| Level 4                 |      | C20 H15 F4 N O2         | 377.10463 | 12.858   |
| Level 4                 |      | C20 H18 S               | 290.11284 | 13.369   |
| Level 4                 |      | C20 H20 N2 O            | 304.15732 | 13.764   |
| Level 4                 |      | C20 H20 N2 O2           | 320.15246 | 11.921   |
| Level 4                 |      | C20 H20 O5              | 340.129   | 12.904   |
| Level 4                 |      | C20 H21 F N2 O          | 324.1639  | 13.051   |
| Level 4                 |      | C20 H21 F N5 O2 P       | 413.14087 | 12.057   |
| Level 4                 |      | C20 H21 N O2            | 307.15364 | 7.06     |
| Level 4                 |      | C20 H22 N2 O            | 328.15013 | 14.415   |
| Level 4                 |      | C20 H24 N2 O4           | 356.17335 | 10.052   |
| Level 4                 |      | C20 H25 F3 O            | 338.18622 | 21.08    |
| Level 4                 |      | C20 H28 F8 N4           | 476.21754 | 14.425   |
| Level 4                 |      | C20 H37 O10 P           | 468.21278 | 20.82    |
| Level 4                 |      | C20 H39 N O S2          | 373.24647 | 8.865    |
| Level 4                 |      | C20 H40 F3 N5 O3        | 455.30959 | 16.457   |
| Level 4                 |      | C20 H41 N O10           | 455.27316 | 15.068   |
| Level 4                 |      | C20 H42 F N O S3        | 427.24171 | 8.623    |
| Level 4                 |      | C20 H43 F2 O4 P3        | 478.23339 | 12.38    |
| Level 4                 |      | C20 H43 N O2 S2         | 393.2727  | 17.572   |
| Level 4                 |      | C20 H44 F N O P2        | 395.28826 | 17.91    |
| Level 4                 |      | C20 H50 F3 N2 O5 P      | 486.34193 | 7.922    |
| Level 4                 |      | C20 H51 F2 N S3         | 439.31461 | 18.098   |
| Level 4                 |      | C20 H52 F3 N5 O15 P2 S2 | 785.23296 | 17.088   |
| Level 4                 |      | C20 H52 N8 O15 P2       | 706.3026  | 6.14     |
| Level 4                 |      | C20 H59 F5 N2 O13       | 630.39414 | 9.65     |
| Level 4                 |      | C20 H60 F7 N2 O2 P3     | 586.37566 | 17.987   |
| Level 4                 |      | C21 H16 F2 O            | 322.11609 | 19.391   |
| Level 4                 |      | C21 H16 N2 O S          | 344.10073 | 14.845   |

| Identification<br>level | Name | Formula             | Calc. MW  | RT [min] |
|-------------------------|------|---------------------|-----------|----------|
| Level 4                 |      | C21 H17 N5 O2       | 371.13703 | 16.369   |
| Level 4                 |      | C21 H18 O4          | 334.1164  | 5.856    |
| Level 4                 |      | C21 H20 N6 O2       | 348.17351 | 21.565   |
| Level 4                 |      | C21 H21 F3 N4 O S3  | 498.08321 | 18.616   |
| Level 4                 |      | C21 H21 N3 O3 S     | 395.13031 | 16.204   |
| Level 4                 |      | C21 H23 N3 O3 S     | 397.14595 | 14.78    |
| Level 4                 |      | C21 H23 N3 O4 S     | 413.14147 | 15.084   |
| Level 4                 |      | C21 H23 N3 O5 S     | 429.13663 | 12.024   |
| Level 4                 |      | C21 H25 Cl N2 O4    | 404.15055 | 16.705   |
| Level 4                 |      | C21 H25 F O S       | 344.1624  | 13.949   |
| Level 4                 |      | C21 H29 F8 P        | 464.18703 | 7.649    |
| Level 4                 |      | C21 H30 F N O9      | 459.19079 | 14.427   |
| Level 4                 |      | C21 H30 S           | 314.20651 | 7.883    |
| Level 4                 |      | C21 H31 F N2 O7     | 442.21174 | 15.284   |
| Level 4                 |      | C21 H31 F N2 O7     | 442.21187 | 15.641   |
| Level 4                 |      | C21 H32 F3 N4 O P   | 444.22767 | 15.294   |
| Level 4                 |      | C21 H33 N O3        | 347.24621 | 9.933    |
| Level 4                 |      | C21 H35 F N2 O8     | 462.23825 | 14.273   |
| Level 4                 |      | C21 H37 F3 O5       | 426.26039 | 17.038   |
| Level 4                 |      | C21 H37 F5 N O2 P   | 461.24816 | 8.833    |
| Level 4                 |      | C21 H37 N O         | 319.28753 | 15.132   |
| Level 4                 |      | C21 H37 N O P2      | 381.2361  | 6.469    |
| Level 4                 |      | C21 H40 O10         | 452.26197 | 16.193   |
| Level 4                 |      | C21 H41 Cl N O8 P3  | 563.17284 | 12.746   |
| Level 4                 |      | C21 H41 N S3        | 403.24136 | 8.59     |
| Level 4                 |      | C21 H42 O9          | 438.28281 | 16.522   |
| Level 4                 |      | C21 H45 F2 N3 O3 S  | 457.3149  | 16.515   |
| Level 4                 |      | C21 H50 F N O16     | 591.31124 | 9.666    |
| Level 4                 |      | C22 H18 N2 S        | 342.1191  | 11.802   |
| Level 4                 |      | C22 H22 N6 O        | 386.18539 | 14.928   |
| Level 4                 |      | C22 H23 N7 O2       | 417.19026 | 9.668    |
| Level 4                 |      | C22 H24 N6 O2       | 404.19604 | 13.488   |
| Level 4                 |      | C22 H25 F2 N O4     | 405.17461 | 2.184    |
| Level 4                 |      | C22 H25 N O2        | 670.38024 | 12.752   |
| Level 4                 |      | C22 H27 N3 O        | 349.21535 | 13.765   |
| Level 4                 |      | C22 H29 F9 O2 P2    | 558.15013 | 14.71    |
| Level 4                 |      | C22 H29 N O6        | 403.19939 | 16.26    |
| Level 4                 |      | C22 H30 F3 N3 O     | 409.23122 | 6.442    |
| Level 4                 |      | C22 H31 F N6 O3     | 446.2432  | 16.014   |
| Level 4                 |      | C22 H34 F2 N3 O4 P3 | 535.17389 | 11.49    |
| Level 4                 |      | C22 H34 F3 N9 O     | 497.28377 | 7.77     |
| Level 4                 |      | C22 H40 N3 O5 P S   | 489.24253 | 8.772    |
| Level 4                 |      | C22 H41 N5 O5       | 455.31005 | 16.168   |
| Level 4                 |      | C22 H43 F O P2      | 404.27762 | 17.036   |

| Identification<br>level | Name | Formula               | Calc. MW  | RT [min] |
|-------------------------|------|-----------------------|-----------|----------|
| Level 4                 |      | C22 H45 N O11         | 499.29903 | 7.906    |
| Level 4                 |      | C22 H46 F N O4 P2     | 469.28881 | 15.854   |
| Level 4                 |      | C22 H49 F2 N5 O S3    | 533.30553 | 9.609    |
| Level 4                 |      | C22 H55 F2 N O5 P2    | 513.35217 | 17.144   |
| Level 4                 |      | C23 H15 N O2          | 337.10971 | 12.511   |
| Level 4                 |      | C23 H17 N O           | 323.13118 | 16.328   |
| Level 4                 |      | C23 H21 F O4          | 380.14205 | 12.821   |
| Level 4                 |      | C23 H28 O8 S          | 464.15089 | 7.822    |
| Level 4                 |      | C23 H31 N3 O4         | 413.23161 | 11.448   |
| Level 4                 |      | C23 H31 N3 O4         | 413.23155 | 11.795   |
| Level 4                 |      | C23 H33 F3 N O6 P     | 507.1987  | 12.956   |
| Level 4                 |      | C23 H34 F2 N6 O8 S    | 592.21345 | 5.44     |
| Level 4                 |      | C23 H35 N O12         | 517.2163  | 11.804   |
| Level 4                 |      | C23 H35 N4 O4 P       | 462.23845 | 13.998   |
| Level 4                 |      | C23 H36 N9 O5 P       | 549.25753 | 16.7     |
| Level 4                 |      | C23 H36 O S2          | 392.22027 | 21.035   |
| Level 4                 |      | C23 H38 F2 N2 S3      | 476.21782 | 12.495   |
| Level 4                 |      | C23 H46 Cl F N2 O4 P2 | 530.26017 | 5.822    |
| Level 4                 |      | C23 H48 F N O7 S      | 501.31495 | 14.034   |
| Level 4                 |      | C23 H48 F2 N3 O8 P    | 563.31574 | 10.133   |
| Level 4                 |      | C23 H48 F4 N2 O5      | 508.34876 | 11.263   |
| Level 4                 |      | C23 H5 F12 O12 P3     | 793.88048 | 3.727    |
| Level 4                 |      | C23 H51 F2 N3 O11     | 583.34801 | 14.128   |
| Level 4                 |      | C23 H55 F2 N O7 P2    | 557.34145 | 16.454   |
| Level 4                 |      | C23 H58 F5 N O4 P2    | 569.3775  | 17.999   |
| Level 4                 |      | C23 H75 N9 O8 S4      | 733.46237 | 16.541   |
| Level 4                 |      | C24 H16 Br4 Si        | 647.77519 | 1.07     |
| Level 4                 |      | C24 H18 F5 N O2       | 447.12567 | 16.66    |
| Level 4                 |      | C24 H19 N O           | 337.14587 | 5.58     |
| Level 4                 |      | C24 H24 Cl F3 O2      | 436.14146 | 15.898   |
| Level 4                 |      | C24 H26 Cl F3 O2      | 438.15718 | 13.802   |
| Level 4                 |      | C24 H26 O2 P2         | 408.13968 | 6.688    |
| Level 4                 |      | C24 H31 N O8          | 461.20507 | 16.197   |
| Level 4                 |      | C24 H33 N O7          | 447.22591 | 16.691   |
| Level 4                 |      | C24 H33 N3 O5         | 443.24269 | 13.697   |
| Level 4                 |      | C24 H34 O5            | 402.24079 | 22.579   |
| Level 4                 |      | C24 H35 Cl F5 N O S2  | 547.17729 | 12.176   |
| Level 4                 |      | C24 H4 Cl O2 P3 S5    | 611.77271 | 0.868    |
| Level 4                 |      | C24 H40 F N O5        | 441.28789 | 16.736   |
| Level 4                 |      | C24 H41 F3 N O2 P     | 463.28398 | 14.679   |
| Level 4                 |      | C24 H43 N4 O6 P3      | 576.2396  | 5.442    |
| Level 4                 |      | C24 H50 F N O5 P2     | 513.31532 | 16.275   |
| Level 4                 |      | C24 H50 F2 N3 O4 P    | 513.35154 | 17.49    |
| Level 4                 |      | C24 H50 O13           | 546.3239  | 15.065   |

| Identification<br>level | Name | Formula              | Calc. MW  | RT [min] |
|-------------------------|------|----------------------|-----------|----------|
| Level 4                 |      | C24 H51 F N2 O5 P2   | 528.32568 | 8.157    |
| Level 4                 |      | C24 H56 N5 O9 P      | 589.38311 | 13.513   |
| Level 4                 |      | C24 H57 F4 N4 O2 P S | 572.38833 | 9.417    |
| Level 4                 |      | C24 H75 F4 N10 P S4  | 738.47254 | 13.932   |
| Level 4                 |      | C25 H25 N7 O3        | 471.20198 | 9.245    |
| Level 4                 |      | C25 H26 O5           | 384.19944 | 7.837    |
| Level 4                 |      | C25 H28 N6 O3        | 460.22251 | 13.974   |
| Level 4                 |      | C25 H3 F5 N O17 P3   | 776.85332 | 3.719    |
| Level 4                 |      | C25 H30 N6 O3        | 462.23826 | 14.525   |
| Level 4                 |      | C25 H32 F5 N2 O5 P   | 566.19769 | 12.173   |
| Level 4                 |      | C25 H32 O S          | 380.21726 | 20.6     |
| Level 4                 |      | C25 H36 F N O6       | 465.25176 | 20.879   |
| Level 4                 |      | C25 H39 N O13        | 561.24224 | 12.172   |
| Level 4                 |      | C25 H41 F2 N O2 S    | 457.28345 | 13.481   |
| Level 4                 |      | C25 H52 F N O5 P2    | 527.33089 | 17.031   |
| Level 4                 |      | C25 H53 N            | 367.41761 | 23.502   |
| Level 4                 |      | C25 H81 N9 O3 P2 S4  | 745.48241 | 19.364   |
| Level 4                 |      | C26 H32 O13          | 569.21703 | 15.771   |
| Level 4                 |      | C26 H36 F2 N7 O2 P   | 547.26303 | 12.609   |
| Level 4                 |      | C26 H36 O7           | 460.2465  | 15.673   |
| Level 4                 |      | C26 H40 F4 N O P     | 489.27874 | 8.178    |
| Level 4                 |      | C26 H44 Cl2 N2 O     | 470.28354 | 1.49     |
| Level 4                 |      | C26 H51 N O17        | 649.31644 | 9.615    |
| Level 4                 |      | C26 H55 F3 N7 P      | 553.41963 | 16.692   |
| Level 4                 |      | C26 H56 F N O5 P2    | 543.36222 | 16.746   |
| Level 4                 |      | C26 H63 F N8 O2 S    | 570.47725 | 29.343   |
| Level 4                 |      | C27 H15 N O          | 369.11521 | 15.892   |
| Level 4                 |      | C27 H19 N2 O2 P      | 434.11892 | 10.763   |
| Level 4                 |      | C27 H29 F3 N2 O S    | 486.19577 | 18.347   |
| Level 4                 |      | C27 H38 N7 P         | 491.29438 | 9.157    |
| Level 4                 |      | C27 H43 N O14        | 605.26848 | 13.945   |
| Level 4                 |      | C27 H45 F3 N2 O      | 470.34709 | 9.939    |
| Level 4                 |      | C27 H45 N O3 P2      | 493.28679 | 14.143   |
| Level 4                 |      | C27 H45 N O5 S       | 495.30237 | 13.727   |
| Level 4                 |      | C27 H46 N3 O6 P S    | 571.28444 | 5.44     |
| Level 4                 |      | C27 H55 N O12        | 585.37253 | 17.814   |
| Level 4                 |      | C27 H56 F15 P        | 696.38871 | 11.32    |
| Level 4                 |      | C27 H56 O10          | 557.41432 | 18.696   |
| Level 4                 |      | C27 H57 N O11        | 571.39327 | 18.327   |
| Level 4                 |      | C27 H57 N O6 P2 S    | 585.33661 | 9.166    |
| Level 4                 |      | C27 H58 F N O2 P2    | 509.39347 | 16.587   |
| Level 4                 |      | C27 H58 F N O7 P2    | 589.36707 | 14.587   |
| Level 4                 |      | C27 H59 F N2 O11     | 606.41005 | 9.668    |
| Level 4                 |      | C27 H62 F N O14      | 643.41409 | 18.782   |

| Identification<br>level | Name | Formula                | Calc. MW  | RT [min] |
|-------------------------|------|------------------------|-----------|----------|
| Level 4                 |      | C27 H73 F8 N5 O7       | 731.53964 | 20.465   |
| Level 4                 |      | C27 H76 F8 N7 O4 P S   | 777.52903 | 19.757   |
| Level 4                 |      | C28 H41 F2 N O3 S      | 509.27812 | 20.928   |
| Level 4                 |      | C28 H47 F2 N5 O S      | 539.34732 | 21.607   |
| Level 4                 |      | C28 H53 F2 N O3 S      | 521.37178 | 21.944   |
| Level 4                 |      | C28 H53 N O7 P2        | 577.3311  | 10.27    |
| Level 4                 |      | C28 H58 F N O6 P2      | 585.37235 | 18.066   |
| Level 4                 |      | C29 H35 N2 O4 P        | 506.23394 | 12.787   |
| Level 4                 |      | C29 H38 N10            | 526.32726 | 17.152   |
| Level 4                 |      | C29 H40 F N O6 S       | 549.2575  | 16.607   |
| Level 4                 |      | C29 H43 F2 N9 O5       | 635.33703 | 9.884    |
| Level 4                 |      | C29 H47 N O15          | 649.29445 | 12.783   |
| Level 4                 |      | C29 H59 F2 N O P2 S    | 569.37803 | 18.585   |
| Level 4                 |      | C29 H66 F3 N O3 P2 S   | 627.4192  | 18.773   |
| Level 4                 |      | C29 H70 F14 N8 O4      | 860.53068 | 12.093   |
| Level 4                 |      | C3 H Br Cl F O S2      | 249.83258 | 0.989    |
| Level 4                 |      | C3 H Br Cl3 F8 N9 O6 S | 626.78917 | 1.029    |
| Level 4                 |      | C3 H Cl F3 O3 P S      | 239.9024  | 0.946    |
| Level 4                 |      | C3 H Cl3 N2 O          | 185.91535 | 1.125    |
| Level 4                 |      | C3 H F N2 O P2 S       | 193.927   | 1.026    |
| Level 4                 |      | C3 H F N5 O8 P3        | 346.90218 | 1.183    |
| Level 4                 |      | C3 H F2 N4 O13 P3 S2   | 495.81662 | 1.056    |
| Level 4                 |      | C3 H F2 P3 S2          | 231.87074 | 1.02     |
| Level 4                 |      | C3 H F3 O13 P2 S2      | 427.82853 | 1.03     |
| Level 4                 |      | C3 H F3 O13 P2 S2      | 427.82931 | 1.15     |
| Level 4                 |      | C3 H F4 O12 P3 S       | 429.83399 | 1.048    |
| Level 4                 |      | C3 H F8 N O2 P2 S3     | 392.85167 | 0.868    |
| Level 4                 |      | C3 H F8 P3 S3          | 377.83265 | 1.089    |
| Level 4                 |      | C3 H F8 P3 S3          | 377.83257 | 1.148    |
| Level 4                 |      | C3 H N2 O16 P S        | 383.87844 | 1.196    |
| Level 4                 |      | C3 H N4 O2 P3 S3       | 313.84734 | 1.117    |
| Level 4                 |      | C3 H O12 P3 S3         | 417.78421 | 20.196   |
| Level 4                 |      | C3 H O17 P S2          | 403.83965 | 0.928    |
| Level 4                 |      | C3 H10 Cl2 F2 O9 P2 S4 | 487.80287 | 0.902    |
| Level 4                 |      | C3 H10 F N2 O4 P       | 188.03607 | 0.983    |
| Level 4                 |      | C3 H10 F2 N6 O2        | 200.08314 | 6.276    |
| Level 4                 |      | C3 H10 O3 P2 S         | 187.98247 | 0.854    |
| Level 4                 |      | C3 H10 O7              | 158.04273 | 1.023    |
| Level 4                 |      | C3 H2 Br2 O4           | 259.83204 | 1.03     |
| Level 4                 |      | C3 H2 Cl3 F3 O3 P2 S   | 341.82079 | 0.929    |
| Level 4                 |      | C3 H2 F N2 O13 P3 S3   | 481.79115 | 1.035    |
| Level 4                 |      | C3 H2 F O12 P3 S3      | 437.79079 | 20.826   |
| Level 4                 |      | C3 H2 F2 N3 O P3 S3    | 322.85443 | 1.046    |
| Level 4                 |      | C3 H2 F2 N3 O2 P3      | 242.93264 | 1.021    |

| Identification<br>level | Name | Formula                 | Calc. MW  | RT [min] |
|-------------------------|------|-------------------------|-----------|----------|
| Level 4                 |      | C3 H2 F3 N O3 P2 S3     | 314.86188 | 0.997    |
| Level 4                 |      | C3 H2 F3 O4 P S         | 221.93641 | 1.087    |
| Level 4                 |      | C3 H2 F4 O7 S3          | 321.8899  | 1.149    |
| Level 4                 |      | C3 H2 F5 N3 O2 P2       | 268.95428 | 0.955    |
| Level 4                 |      | C3 H2 F6 N6 O7 P2 S3    | 505.85253 | 1.087    |
| Level 4                 |      | C3 H2 F6 N6 O8 P2 S2    | 489.87496 | 1.193    |
| Level 4                 |      | C3 H2 F8 N3 O11 P3 S2   | 564.8206  | 1.043    |
| Level 4                 |      | C3 H2 N P3 S            | 176.91175 | 1.092    |
| Level 4                 |      | C3 H2 N4 O P2           | 171.97088 | 0.888    |
| Level 4                 |      | C3 H3 Cl N2 O2 S3       | 229.90521 | 1.082    |
| Level 4                 |      | C3 H3 Cl N4 O P2        | 207.94746 | 0.944    |
| Level 4                 |      | C3 H3 Cl O2 P           | 136.95559 | 0.953    |
| Level 4                 |      | C3 H3 Cl O2 P           | 136.95551 | 1.148    |
| Level 4                 |      | C3 H3 Cl2 O5 P3 S2      | 345.80118 | 1.06     |
| Level 4                 |      | C3 H3 F N P3 S          | 196.91847 | 1.074    |
| Level 4                 |      | C3 H3 F N3 O3 P3 S3     | 336.85311 | 1        |
| Level 4                 |      | C3 H3 F N4 S            | 146.00647 | 0.94     |
| Level 4                 |      | C3 H3 F N7 O P3         | 264.95947 | 1.127    |
| Level 4                 |      | C3 H3 F2 O3 P3          | 217.92643 | 0.992    |
| Level 4                 |      | C3 H3 F3 N2 O P2 S5     | 361.82824 | 0.944    |
| Level 4                 |      | C3 H3 F3 O3 S2          | 207.94762 | 1.265    |
| Level 4                 |      | C3 H3 F4 N O3 P2 S3     | 334.86839 | 1.075    |
| Level 4                 |      | C3 H3 O13 P3 S2         | 403.82311 | 1.206    |
| Level 4                 |      | C3 H3 O3 P3 S2          | 243.87389 | 1.062    |
| Level 4                 |      | C3 H3 O4 P3 S2          | 259.86843 | 1.19     |
| Level 4                 |      | C3 H4 Br Cl N2 S        | 213.89609 | 0.958    |
| Level 4                 |      | C3 H4 Cl F3 N7 P S5     | 420.85082 | 1.008    |
| Level 4                 |      | C3 H4 Cl N3 O           | 133.00436 | 1.167    |
| Level 4                 |      | C3 H4 Cl2 F2 N4 O P2    | 281.92094 | 1.129    |
| Level 4                 |      | C3 H4 Cl2 F2 N4 O P2 S4 | 409.80903 | 0.974    |
| Level 4                 |      | C3 H4 Cl2 F3 O3 P       | 245.92234 | 1.088    |
| Level 4                 |      | C3 H4 F N2 O P3 S3      | 291.86803 | 1.052    |
| Level 4                 |      | C3 H4 F N3 O P2 S4      | 306.86928 | 1.019    |
| Level 4                 |      | C3 H4 F15 O8 P3 S       | 577.86003 | 17.543   |
| Level 4                 |      | C3 H4 F3 N O3 S3        | 254.93045 | 0.944    |
| Level 4                 |      | C3 H4 F3 N2 O2 P S3     | 283.91158 | 0.963    |
| Level 4                 |      | C3 H4 F3 P3             | 189.9477  | 0.881    |
| Level 4                 |      | C3 H4 F9 O5 P3 S        | 415.88558 | 1.175    |
| Level 4                 |      | C3 H4 N O15 P S3        | 420.84828 | 0.973    |
| Level 4                 |      | C3 H4 N3 O2 P S2        | 208.94821 | 0.942    |
| Level 4                 |      | C3 H4 O3 S3             | 183.9325  | 0.941    |
| Level 4                 |      | C3 H5 Cl2 N2 O P S2     | 249.89657 | 12.568   |
| Level 4                 |      | C3 H5 Cl2 O P3 S5       | 379.75399 | 1.085    |
| Level 4                 |      | C3 H5 F10 O11 P S3      | 533.85723 | 1.075    |

| Identification<br>level | Name | Formula              | Calc. MW  | RT [min] |
|-------------------------|------|----------------------|-----------|----------|
| Level 4                 |      | C3 H5 F11 O13 P2 S3  | 615.81843 | 1.14     |
| Level 4                 |      | C3 H5 F4 P3 S2       | 273.89808 | 0.861    |
| Level 4                 |      | C3 H5 O10 P3 S3      | 389.82595 | 1.077    |
| Level 4                 |      | C3 H5 O15 P3 S       | 405.85628 | 0.959    |
| Level 4                 |      | C3 H5 O4 P3 S2       | 261.88444 | 1.089    |
| Level 4                 |      | C3 H6 F N4 O2 P3 S2  | 305.91249 | 1.088    |
| Level 4                 |      | C3 H6 F3 N2 O3 P S5  | 365.86735 | 1.127    |
| Level 4                 |      | C3 H6 F5 N O4 S2     | 278.96587 | 1.059    |
| Level 4                 |      | C3 H6 F5 O3 P S2     | 279.94181 | 1.105    |
| Level 4                 |      | C3 H6 F6 N O11 P3 S2 | 502.84996 | 1.155    |
| Level 4                 |      | C3 H6 N3 O2 P        | 147.02008 | 0.943    |
| Level 4                 |      | C3 H7 Br F P         | 171.94487 | 1.131    |
| Level 4                 |      | C3 H7 Br P2 S        | 215.89332 | 0.944    |
| Level 4                 |      | C3 H7 F N O5 P S     | 218.97679 | 0.934    |
| Level 4                 |      | C3 H7 F N2 O S       | 138.02638 | 0.95     |
| Level 4                 |      | C3 H7 F2 N3 O3 P2    | 232.99249 | 0.94     |
| Level 4                 |      | C3 H7 N2 P S2        | 165.97896 | 0.941    |
| Level 4                 |      | C3 H7 N3 O2          | 117.0537  | 1.511    |
| Level 4                 |      | C3 H7 N3 P2 S4       | 274.89995 | 1.083    |
| Level 4                 |      | C3 H7 N5 O2          | 145.0599  | 1.312    |
| Level 4                 |      | C3 H7 N7 O4          | 205.05586 | 10.567   |
| Level 4                 |      | C3 H7 O6 P3 S3       | 327.862   | 0.987    |
| Level 4                 |      | C3 H8 Cl2 F N4 O P   | 235.97884 | 29.346   |
| Level 4                 |      | C3 H8 Cl2 F6 O P2 S  | 337.9059  | 1.038    |
| Level 4                 |      | C3 H8 Cl2 Si         | 141.97687 | 0.948    |
| Level 4                 |      | C3 H8 F6 N O9 P3 S3  | 504.84786 | 21.461   |
| Level 4                 |      | C3 H9 Br O P2 S      | 233.90382 | 0.956    |
| Level 4                 |      | C3 H9 Cl2 O P3       | 223.9249  | 0.941    |
| Level 4                 |      | C3 H9 F N2 O3 P2 S2  | 265.95088 | 1.1      |
| Level 4                 |      | C3 H9 F2 O18 P3 S2   | 527.84111 | 1.036    |
| Level 4                 |      | C3 H9 N3             | 87.07956  | 1.319    |
| Level 4                 |      | C30 H30 F2 O         | 444.22799 | 15.502   |
| Level 4                 |      | C30 H31 F N4 O4      | 530.23242 | 18.123   |
| Level 4                 |      | C30 H38 F3 N2 O4 P S | 610.22376 | 13.946   |
| Level 4                 |      | C30 H43 N O11        | 593.28371 | 16.791   |
| Level 4                 |      | C30 H44 F4 N O3 P    | 573.29958 | 9.263    |
| Level 4                 |      | C30 H55 N O5 P2      | 571.35701 | 17.254   |
| Level 4                 |      | C30 H58 N2 O9        | 590.41432 | 8.267    |
| Level 4                 |      | C30 H61 N O13        | 643.41466 | 18.567   |
| Level 4                 |      | C30 H63 N O10        | 597.44587 | 16.792   |
| Level 4                 |      | C30 H74 F4 N2 O14    | 762.50792 | 19.351   |
| Level 4                 |      | C31 H56 N8 O7        | 652.42649 | 12.118   |
| Level 4                 |      | C31 H60 N3 O4 P S    | 601.40367 | 18.507   |
| Level 4                 |      | C31 H61 F8 N2 O6 P   | 740.41489 | 11.644   |



| Identification<br>level | Name | Formula               | Calc. MW  | RT [min] |
|-------------------------|------|-----------------------|-----------|----------|
| Level 4                 |      | C31 H71 N7 O S4       | 685.46106 | 19.42    |
| Level 4                 |      | C32 H26 N2 O2         | 470.20068 | 18.832   |
| Level 4                 |      | C32 H47 N O12         | 637.30986 | 16.883   |
| Level 4                 |      | C32 H47 N O12         | 637.30975 | 16.968   |
| Level 4                 |      | C32 H57 F5 N O3 P     | 629.39877 | 18.065   |
| Level 4                 |      | C32 H68 F6 O10        | 726.47194 | 13.327   |
| Level 4                 |      | C32 H81 N7 O17        | 835.56945 | 20.331   |
| Level 4                 |      | C33 H30 F N           | 459.2373  | 13.531   |
| Level 4                 |      | C33 H30 F N3 O        | 503.23691 | 12.257   |
| Level 4                 |      | C33 H30 N4 O2         | 257.11871 | 18.532   |
| Level 4                 |      | C33 H38 F N3 O        | 511.29953 | 8.155    |
| Level 4                 |      | C33 H42 N O P         | 499.29965 | 15.21    |
| Level 4                 |      | C33 H52 O5 P2         | 590.32811 | 18.078   |
| Level 4                 |      | C33 H61 F N3 O5 P     | 629.43497 | 19.034   |
| Level 4                 |      | C33 H67 N O14         | 701.45576 | 19.364   |
| Level 4                 |      | C34 H51 F2 N5 O2 P2 S | 693.32048 | 13.043   |
| Level 4                 |      | C34 H66 F5 N4 O3 P3 S | 798.39956 | 13.499   |
| Level 4                 |      | C34 H69 F6 N8 O2 P    | 766.51929 | 11.009   |
| Level 4                 |      | C34 H83 F2 O10 P3 S   | 814.48822 | 12.551   |
| Level 4                 |      | C34 H93 F2 N6 O11 P3  | 892.60814 | 20.713   |
| Level 4                 |      | C34 H94 F N9 O10      | 807.71079 | 0.891    |
| Level 4                 |      | C35 H49 F3 N2 O6 P2   | 712.30139 | 5.494    |
| Level 4                 |      | C35 H53 F O10         | 652.36238 | 10.968   |
| Level 4                 |      | C35 H58 F2 N10 O8     | 784.44123 | 11.944   |
| Level 4                 |      | C35 H59 N O5 Si2      | 629.39134 | 17.725   |
| Level 4                 |      | C35 H61 N5 O2 S       | 615.45589 | 19.388   |
| Level 4                 |      | C35 H63 F5 N O4 P     | 687.4405  | 18.772   |
| Level 4                 |      | C35 H72 F11 N2 O4 P3  | 886.45181 | 13.884   |
| Level 4                 |      | C35 H73 F N2 O14      | 764.50435 | 13.63    |
| Level 4                 |      | C35 H73 F12 O4 P      | 816.5048  | 11.828   |
| Level 4                 |      | C35 H78 F8 O4 P2      | 776.52433 | 19.749   |
| Level 4                 |      | C35 H91 F9 N8 O9      | 938.67655 | 21.385   |
| Level 4                 |      | C36 H67 F N3 O6 P     | 687.47683 | 19.629   |
| Level 4                 |      | C36 H72 F8 O P2       | 734.4924  | 12.401   |
| Level 4                 |      | C36 H73 F10 N3 O5     | 817.53959 | 20.373   |
| Level 4                 |      | C36 H73 N O15         | 759.49761 | 19.904   |
| Level 4                 |      | C36 H74 S2            | 570.52342 | 17.521   |
| Level 4                 |      | C36 H81 F N2 O12 P2   | 814.52494 | 13.794   |
| Level 4                 |      | C36 H81 F4 N4 O12 P S | 900.52458 | 13.574   |
| Level 4                 |      | C36 H82 F2 N2 O13 S   | 820.55086 | 19.884   |
| Level 4                 |      | C37 H62 F2 N10 O9     | 828.46741 | 12.219   |
| Level 4                 |      | C37 H69 F N4 O15      | 828.47475 | 12.748   |
| Level 4                 |      | C37 H83 F12 N3 O P2   | 875.58194 | 20.786   |
| Level 4                 |      | C38 H54 O7            | 622.38862 | 10.627   |

| Identification<br>level | Name | Formula                 | Calc. MW   | RT [min] |
|-------------------------|------|-------------------------|------------|----------|
| Level 4                 |      | C38 H59 F S             | 566.43147  | 27.782   |
| Level 4                 |      | C38 H60 F3 N9 O4        | 763.47268  | 17.65    |
| Level 4                 |      | C38 H66 F5 N7 O S3      | 827.44328  | 17.132   |
| Level 4                 |      | C38 H71 F2 N4 O6 P      | 748.5084   | 12.155   |
| Level 4                 |      | C38 H71 F5 N10 P2 S     | 856.4979   | 13.369   |
| Level 4                 |      | C38 H73 F N2 O6 P2      | 734.49285  | 12.209   |
| Level 4                 |      | C39 H33 F3              | 558.25408  | 18.314   |
| Level 4                 |      | C39 H50 F8              | 670.37965  | 8.302    |
| Level 4                 |      | C39 H62 F8 N P          | 727.44891  | 16.485   |
| Level 4                 |      | C39 H63 F O9            | 694.44597  | 15.021   |
| Level 4                 |      | C39 H80 F3 N3 O3 P2     | 757.56236  | 28.718   |
| Level 4                 |      | C39 H93 F15 N8 O12      | 1150.66733 | 14.203   |
| Level 4                 |      | C4 Cl6 Hg               | 459.78449  | 0.922    |
| Level 4                 |      | C4 F4 O                 | 139.98828  | 0.958    |
| Level 4                 |      | C4 H Cl F3 O2 P S       | 235.90747  | 0.945    |
| Level 4                 |      | C4 H Cl2 F10 O9 P3 S    | 577.77715  | 1.017    |
| Level 4                 |      | C4 H Cl2 F4 N2 O5 P3 S2 | 459.78511  | 1.051    |
| Level 4                 |      | C4 H F N3 P3 S2         | 266.8807   | 1.051    |
| Level 4                 |      | C4 H F O13 P2 S         | 369.85956  | 0.922    |
| Level 4                 |      | C4 H F O14 P2           | 353.88212  | 0.897    |
| Level 4                 |      | C4 H F10 O3 P3 S3       | 475.81395  | 1.047    |
| Level 4                 |      | C4 H F2 N O2 P2 S2      | 258.88963  | 0.978    |
| Level 4                 |      | C4 H F2 N3 O5 S3        | 304.90462  | 1.046    |
| Level 4                 |      | C4 H F3 N3 O2 P3 S3     | 368.83959  | 1        |
| Level 4                 |      | C4 H F4 N P2 S          | 232.92407  | 0.935    |
| Level 4                 |      | C4 H F4 O P S2          | 235.91414  | 1.214    |
| Level 4                 |      | C4 H F4 O12 P3 S3       | 505.77613  | 1.05     |
| Level 4                 |      | C4 H F5 N O4 P3 S2      | 378.84838  | 1.018    |
| Level 4                 |      | C4 H F5 N2 O5 P2 S2     | 377.87228  | 1.064    |
| Level 4                 |      | C4 H F5 N2 O6 P2 S3     | 425.83907  | 1.029    |
| Level 4                 |      | C4 H F6 N2 O2 P S3      | 349.88423  | 1.303    |
| Level 4                 |      | C4 H F6 O6 P3 S2        | 415.83351  | 0.943    |
| Level 4                 |      | C4 H N2 O3 P3 S         | 249.89183  | 0.981    |
| Level 4                 |      | C4 H N6 P               | 163.99973  | 1.029    |
| Level 4                 |      | C4 H P3 S3              | 237.84605  | 0.966    |
| Level 4                 |      | C4 H10 N3 P S           | 163.03307  | 0.916    |
| Level 4                 |      | C4 H10 N6 O2            | 174.08651  | 1.317    |
| Level 4                 |      | C4 H10 O2               | 90.06821   | 5.802    |
| Level 4                 |      | C4 H10 O2               | 90.06804   | 6.275    |
| Level 4                 |      | C4 H11 N O2 S           | 137.05089  | 1.129    |
| Level 4                 |      | C4 H11 P S2             | 154.004    | 0.896    |
| Level 4                 |      | C4 H12 F3 N2 O3 P       | 224.05406  | 7.916    |
| Level 4                 |      | C4 H12 N2               | 88.09984   | 1.058    |
| Level 4                 |      | C4 H13 F N3 O P3 S      | 262.99756  | 29.348   |

| Identification<br>level | Name | Formula                | Calc. MW  | RT [min] |
|-------------------------|------|------------------------|-----------|----------|
| Level 4                 |      | C4 H14 Cl O4 P3 S      | 285.95125 | 13.899   |
| Level 4                 |      | C4 H14 F N O6          | 191.08069 | 7.923    |
| Level 4                 |      | C4 H14 F2 N8 O         | 228.12643 | 7.382    |
| Level 4                 |      | C4 H14 F3 N3 S         | 193.08568 | 8.962    |
| Level 4                 |      | C4 H14 F3 N9 O5        | 325.10735 | 8.13     |
| Level 4                 |      | C4 H14 F5 N3           | 199.11096 | 12.32    |
| Level 4                 |      | C4 H2 Cl F8 P3 S       | 361.8658  | 12.558   |
| Level 4                 |      | C4 H2 Cl4 O2           | 221.88155 | 1.169    |
| Level 4                 |      | C4 H2 F N9 P2 S3       | 352.90589 | 1.148    |
| Level 4                 |      | C4 H2 F O3 P S3        | 243.88877 | 1.122    |
| Level 4                 |      | C4 H2 F2 N O12 P3 S3   | 482.79216 | 1.071    |
| Level 4                 |      | C4 H2 F2 O3 P2 S2      | 261.88919 | 1.024    |
| Level 4                 |      | C4 H2 F2 O8 P2 S3      | 373.83594 | 1.026    |
| Level 4                 |      | C4 H2 F4 N2 O9 P2 S    | 391.88924 | 1.039    |
| Level 4                 |      | C4 H2 N O11 P3 S       | 364.85668 | 0.866    |
| Level 4                 |      | C4 H2 N4 S2            | 169.97187 | 0.951    |
| Level 4                 |      | C4 H2 O11 P2 S3        | 383.82329 | 0.938    |
| Level 4                 |      | C4 H3 Br Cl F4 N4 O8 P | 455.8495  | 1.047    |
| Level 4                 |      | C4 H3 Br F6            | 243.93266 | 0.935    |
| Level 4                 |      | C4 H3 Cl F3 O4 P       | 237.94064 | 0.947    |
| Level 4                 |      | C4 H3 Cl N5 O3 P       | 234.96631 | 0.953    |
| Level 4                 |      | C4 H3 F N2 O6 P2 S2    | 319.8893  | 1.081    |
| Level 4                 |      | C4 H3 F N2 O8 P2 S2    | 351.87914 | 0.989    |
| Level 4                 |      | C4 H3 F2 N4 O2 P3 S2   | 333.88816 | 1.034    |
| Level 4                 |      | C4 H3 F3 N O7 P3 S2    | 390.85164 | 1.019    |
| Level 4                 |      | C4 H3 F3 O2            | 140.00888 | 0.948    |
| Level 4                 |      | C4 H3 O10 P3 S3        | 399.81056 | 1.132    |
| Level 4                 |      | C4 H3 O2 P3 S3         | 271.8511  | 1.089    |
| Level 4                 |      | C4 H3 O5 P S3          | 257.8881  | 1.169    |
| Level 4                 |      | C4 H4 Cl2              | 121.96937 | 0.953    |
| Level 4                 |      | C4 H4 F5 N O3 P2 S3    | 366.87494 | 1.044    |
| Level 4                 |      | C4 H4 F5 N2 P S2       | 269.9475  | 0.926    |
| Level 4                 |      | C4 H4 N5 O4 P3 S3      | 374.86455 | 1.082    |
| Level 4                 |      | C4 H5 Cl N4            | 144.02037 | 4.268    |
| Level 4                 |      | C4 H5 Cl N4 O          | 160.0152  | 2.726    |
| Level 4                 |      | C4 H5 F N3 O16 P3 S3   | 558.80284 | 1.029    |
| Level 4                 |      | C4 H5 F2 N2 O13 P3 S3  | 515.81346 | 1.021    |
| Level 4                 |      | C4 H5 F2 N2 O5 P3 S2   | 355.88204 | 1.075    |
| Level 4                 |      | C4 H5 F3 N9 O5 P       | 347.01033 | 29.358   |
| Level 4                 |      | C4 H5 F3 S             | 142.00626 | 0.939    |
| Level 4                 |      | C4 H5 N O6 P2 S2       | 288.90325 | 1.049    |
| Level 4                 |      | C4 H5 N2 O4 P3         | 237.94612 | 1.128    |
| Level 4                 |      | C4 H5 N3 O             | 111.04323 | 1.158    |
| Level 4                 |      | C4 H5 N5 O4 P2         | 248.98198 | 0.948    |

| Identification<br>level | Name | Formula               | Calc. MW   | RT [min] |
|-------------------------|------|-----------------------|------------|----------|
| Level 4                 |      | C4 H5 O10 P3 S3       | 401.82584  | 1.139    |
| Level 4                 |      | C4 H6 F O18 P3 S2     | 517.81939  | 1.074    |
| Level 4                 |      | C4 H6 F7 N10 O14 P S  | 613.94115  | 22.662   |
| Level 4                 |      | C4 H6 N2 O S2         | 161.99207  | 4.656    |
| Level 4                 |      | C4 H6 N2 O10 P2 S3    | 399.86667  | 1.109    |
| Level 4                 |      | C4 H6 N2 S2           | 145.9973   | 9.308    |
| Level 4                 |      | C4 H6 N3 O P S3       | 238.9415   | 0.942    |
| Level 4                 |      | C4 H6 N6 O2           | 170.05567  | 4.689    |
| Level 4                 |      | C4 H6 O5 P            | 164.99496  | 1.185    |
| Level 4                 |      | C4 H7 Cl N2 O4 S      | 213.98118  | 0.918    |
| Level 4                 |      | C4 H7 Cl2 P3 S4       | 345.80284  | 1.008    |
| Level 4                 |      | C4 H7 F2 N2 O12 P3 S3 | 501.83353  | 1.062    |
| Level 4                 |      | C4 H7 N2 O2 P3 S      | 239.94412  | 0.844    |
| Level 4                 |      | C4 H7 N2 P3 S3        | 271.89837  | 1.094    |
| Level 4                 |      | C4 H7 N3 O2           | 129.05382  | 1.173    |
| Level 4                 |      | C4 H7 N5 O            | 141.06502  | 1.294    |
| Level 4                 |      | C4 H7 N7 O            | 169.07145  | 2.185    |
| Level 4                 |      | C4 H8 N4 O            | 128.06974  | 1.158    |
| Level 4                 |      | C4 H8 N6 O            | 156.07634  | 4.964    |
| Level 4                 |      | C4 H8 N6 O            | 156.07628  | 5.805    |
| Level 4                 |      | C4 H8 N6 O            | 156.07628  | 6.29     |
| Level 4                 |      | C4 H8 S               | 88.0346    | 1.953    |
| Level 4                 |      | C4 H9 F N2 O S        | 152.0418   | 1.036    |
| Level 4                 |      | C4 H9 N2 P S2         | 179.99467  | 0.93     |
| Level 4                 |      | C4 H9 N3 O2 P2        | 193.01754  | 9.062    |
| Level 4                 |      | C4 H9 N7              | 155.09189  | 1.239    |
| Level 4                 |      | C40 H107 F N4 O9 P2   | 868.74974  | 24.093   |
| Level 4                 |      | C40 H66 O7 S          | 690.45168  | 10.764   |
| Level 4                 |      | C40 H78 N2            | 586.61614  | 18.103   |
| Level 4                 |      | C40 H78 N2 O14 P2     | 872.49362  | 12.475   |
| Level 4                 |      | C40 H85 F N2 O10 P2   | 834.56597  | 20.237   |
| Level 4                 |      | C40 H89 N3 P2 S       | 705.62488  | 25.994   |
| Level 4                 |      | C41 H49 N3 O2         | 615.38323  | 17.328   |
| Level 4                 |      | C41 H89 N10 O4 P3     | 878.62878  | 20.993   |
| Level 4                 |      | C42 H71 F O11         | 770.49774  | 13.568   |
| Level 4                 |      | C42 H78 F10 N8 P2     | 946.56758  | 13.243   |
| Level 4                 |      | C42 H87 F2 N4 O18 P   | 1004.57274 | 13.137   |
| Level 4                 |      | C42 H95 F4 N5 O9 P2   | 951.65409  | 21.102   |
| Level 4                 |      | C43 H62 O6            | 674.45542  | 10.833   |
| Level 4                 |      | C43 H70 F2 O3 P2 S2   | 798.42057  | 10.722   |
| Level 4                 |      | C43 H73 F10 O3 P      | 858.51476  | 12.8     |
| Level 4                 |      | C43 H73 F5 N4 O11     | 916.51987  | 12.713   |
| Level 4                 |      | C43 H79 F8 N6 O P     | 878.59274  | 20.336   |
| Level 4                 |      | C44 H103 F2 N7 O6     | 863.79381  | 25.876   |

| Identification<br>level | Name | Formula                 | Calc. MW   | RT [min] |
|-------------------------|------|-------------------------|------------|----------|
| Level 4                 |      | C44 H54 F16 N P         | 931.3737   | 17.12    |
| Level 4                 |      | C44 H61 N9 O S          | 763.47184  | 14.367   |
| Level 4                 |      | C44 H64 F2 N O4 P       | 739.45638  | 12.665   |
| Level 4                 |      | C44 H64 F3 N2 O2 P3 S   | 834.38555  | 8.223    |
| Level 4                 |      | C44 H77 N5 O6 S         | 803.55993  | 20.603   |
| Level 4                 |      | C45 H107 F2 O14 P3 S    | 1034.65684 | 14.695   |
| Level 4                 |      | C45 H51 F N8 O8         | 850.38075  | 5.903    |
| Level 4                 |      | C45 H81 F2 N8 O6 P3     | 960.54644  | 12.933   |
| Level 4                 |      | C45 H84 F16 N6 O4       | 1076.62986 | 14.271   |
| Level 4                 |      | C46 H104 F11 N2 O13 P S | 1164.6821  | 14.571   |
| Level 4                 |      | C46 H105 F3 N2 O4 P2    | 868.75017  | 24.884   |
| Level 4                 |      | C46 H64 F9 N3 O3 P2     | 939.42838  | 2.722    |
| Level 4                 |      | C46 H93 F5 N10 O6 S     | 1008.69242 | 21.435   |
| Level 4                 |      | C47 H66 N4 O6           | 782.49798  | 15.389   |
| Level 4                 |      | C47 H76 F11 N4 O4 P3 S  | 1094.46208 | 6.236    |
| Level 4                 |      | C47 H80 F5 N6 O P S     | 902.57767  | 14.191   |
| Level 4                 |      | C47 H83 F5 N4 O12       | 990.59394  | 13.443   |
| Level 4                 |      | C48 H110 F10 O6 P2 S    | 1066.73429 | 21.74    |
| Level 4                 |      | C48 H75 F N4 O11        | 902.54096  | 13.03    |
| Level 4                 |      | C49 H88 F N8 O7 P       | 950.65026  | 21.08    |
| Level 4                 |      | C5 H Cl F2 N O P3       | 256.89249  | 0.954    |
| Level 4                 |      | C5 H F N3 O2 P3 S       | 278.89833  | 1.025    |
| Level 4                 |      | C5 H F O13 P2 S3        | 445.80409  | 1.047    |
| Level 4                 |      | C5 H F O6 P2 S3         | 333.83897  | 0.899    |
| Level 4                 |      | C5 H F10 O9 P3 S        | 519.8394   | 1.067    |
| Level 4                 |      | C5 H F12 N2 O3 P3 S     | 489.87294  | 1.113    |
| Level 4                 |      | C5 H F2 O5 P S2         | 273.89655  | 0.86     |
| Level 4                 |      | C5 H F6 N2 P3 S3        | 391.84187  | 1.05     |
| Level 4                 |      | C5 H N6 P               | 175.99968  | 0.91     |
| Level 4                 |      | C5 H N7 O2 P2 S3        | 348.88274  | 1.035    |
| Level 4                 |      | C5 H O9 P3 S            | 329.85522  | 0.92     |
| Level 4                 |      | C5 H10 Cl O2 P3         | 229.95874  | 0.867    |
| Level 4                 |      | C5 H10 F2 O S           | 156.04241  | 7.197    |
| Level 4                 |      | C5 H10 F3 N5 O4         | 261.06834  | 15.103   |
| Level 4                 |      | C5 H10 N2 O2            | 130.07417  | 1.079    |
| Level 4                 |      | C5 H10 N2 O2            | 130.07425  | 5.693    |
| Level 4                 |      | C5 H10 N2 O3            | 146.06905  | 1.371    |
| Level 4                 |      | C5 H10 N2 O4            | 162.06409  | 11.462   |
| Level 4                 |      | C5 H10 N4 O             | 142.08543  | 1.219    |
| Level 4                 |      | C5 H10 N6 O2            | 186.08642  | 1.554    |
| Level 4                 |      | C5 H11 Br N P S2        | 258.92548  | 1.182    |
| Level 4                 |      | C5 H11 F2 N S2          | 187.03029  | 6.686    |
| Level 4                 |      | C5 H11 N7 O             | 185.1024   | 1.363    |
| Level 4                 |      | C5 H11 N8 O2 P3 S       | 339.99388  | 6.87     |

| Identification<br>level | Name | Formula                  | Calc. MW  | RT [min] |
|-------------------------|------|--------------------------|-----------|----------|
| Level 4                 |      | C5 H12 Cl N2 O2 P        | 198.03255 | 6.978    |
| Level 4                 |      | C5 H12 Cl6 F2 O6         | 415.87297 | 0.865    |
| Level 4                 |      | C5 H12 N O4 P            | 181.05047 | 3.974    |
| Level 4                 |      | C5 H12 N3 P S            | 177.04878 | 29.342   |
| Level 4                 |      | C5 H13 F N5 P            | 193.08944 | 12.442   |
| Level 4                 |      | C5 H13 F3 O2 S           | 194.05818 | 10.344   |
| Level 4                 |      | C5 H13 N O3              | 135.08953 | 1.054    |
| Level 4                 |      | C5 H13 N2 P S            | 164.05347 | 0.966    |
| Level 4                 |      | C5 H14 F2 N6 S           | 228.09732 | 7.767    |
| Level 4                 |      | C5 H15 F4 N5 O           | 237.12093 | 8.216    |
| Level 4                 |      | C5 H16 F3 N O S          | 195.08988 | 6.614    |
| Level 4                 |      | C5 H16 N9 O2 P           | 265.1172  | 7.239    |
| Level 4                 |      | C5 H17 Cl N6 S           | 228.09293 | 2.339    |
| Level 4                 |      | C5 H17 F2 N O4           | 193.11228 | 1.037    |
| Level 4                 |      | C5 H17 F2 N O4           | 193.11231 | 1.203    |
| Level 4                 |      | C5 H17 F4 N5             | 223.14212 | 10.213   |
| Level 4                 |      | C5 H17 N2 O8 P           | 264.0721  | 5.346    |
| Level 4                 |      | C5 H17 N3 O5 S           | 231.08967 | 7.197    |
| Level 4                 |      | C5 H2 Cl F2 O2 P S2      | 261.88938 | 1.044    |
| Level 4                 |      | C5 H2 Cl F2 O4 P S2      | 293.87871 | 12.556   |
| Level 4                 |      | C5 H2 Cl N10 O8 P        | 395.94903 | 29.35    |
| Level 4                 |      | C5 H2 Cl N4 O P          | 199.9656  | 0.916    |
| Level 4                 |      | C5 H2 Cl2 N2 O           | 175.95482 | 1.098    |
| Level 4                 |      | C5 H2 Cl3 F5 N8 O2 P2 S4 | 595.76445 | 1.062    |
| Level 4                 |      | C5 H2 F N O3 P2 S4       | 332.83678 | 1.023    |
| Level 4                 |      | C5 H2 F2 O2 S            | 163.97454 | 0.952    |
| Level 4                 |      | C5 H2 F3 N2 O2 P3 S3     | 367.84456 | 1.057    |
| Level 4                 |      | C5 H2 F3 N2 O8 P S2      | 369.89421 | 1.04     |
| Level 4                 |      | C5 H2 F4 N2              | 166.01532 | 0.962    |
| Level 4                 |      | C5 H2 F4 N2              | 166.01538 | 1.311    |
| Level 4                 |      | C5 H2 F4 N4 O3 P2 S2     | 367.89797 | 0.904    |
| Level 4                 |      | C5 H2 F5 O3 P3 S3        | 393.82949 | 0.902    |
| Level 4                 |      | C5 H2 F7 N O4 P2 S3      | 430.85039 | 1.059    |
| Level 4                 |      | C5 H2 N O13 P3 S2        | 440.81892 | 1.054    |
| Level 4                 |      | C5 H2 N O2 P3 S2         | 264.87434 | 0.989    |
| Level 4                 |      | C5 H2 N8 O3 P2 S3        | 379.88897 | 1.199    |
| Level 4                 |      | C5 H3 Cl F O5 P3 S5      | 449.74678 | 0.947    |
| Level 4                 |      | C5 H3 Cl F2 O3 S4        | 311.86119 | 1.088    |
| Level 4                 |      | C5 H3 Cl3 F8 N2 S5       | 507.78359 | 1.014    |
| Level 4                 |      | C5 H3 F2 N2 O3 P S2      | 271.92926 | 0.998    |
| Level 4                 |      | C5 H3 F5 N3 O P3 S3      | 404.85716 | 1.031    |
| Level 4                 |      | C5 H3 F6 O14 P3 S        | 525.83548 | 1.031    |
| Level 4                 |      | C5 H3 N O4 S2            | 204.9504  | 1.297    |
| Level 4                 |      | C5 H4 Cl F5 N3 O P       | 282.97011 | 0.925    |

| Identification<br>level | Name | Formula                  | Calc. MW   | RT [min] |
|-------------------------|------|--------------------------|------------|----------|
| Level 4                 |      | C5 H4 F2 O3 S            | 181.98512  | 0.951    |
| Level 4                 |      | C5 H4 F3 N2 O2 P3 S3     | 369.85994  | 1.332    |
| Level 4                 |      | C5 H4 N O4 S2            | 205.95882  | 0.986    |
| Level 4                 |      | C5 H4 O7 S3              | 271.91188  | 1.058    |
| Level 4                 |      | C5 H5 Cl F4 S3           | 271.91803  | 1.015    |
| Level 4                 |      | C5 H5 F4 O P S           | 219.97373  | 1.04     |
| Level 4                 |      | C5 H5 N O7 P2 S2         | 316.89819  | 1.02     |
| Level 4                 |      | C5 H5 N3                 | 107.04827  | 1.283    |
| Level 4                 |      | C5 H5 N5                 | 135.05471  | 5.732    |
| Level 4                 |      | C5 H5 N5 O               | 151.04939  | 4.397    |
| Level 4                 |      | C5 H6 F3 N2 O9 P3 S3     | 483.84004  | 1.06     |
| Level 4                 |      | C5 H6 N2                 | 94.05298   | 1.359    |
| Level 4                 |      | C5 H6 N2 O2              | 126.04294  | 5.349    |
| Level 4                 |      | C5 H6 O11 P2 S3          | 399.85472  | 1.04     |
| Level 4                 |      | C5 H6 O5 P2 S2           | 271.91321  | 1.093    |
| Level 4                 |      | C5 H6 S3 Se2             | 321.79535  | 0.988    |
| Level 4                 |      | C5 H7 F2 N7 S            | 235.04575  | 7.728    |
| Level 4                 |      | C5 H7 F3 O4              | 188.03022  | 12.32    |
| Level 4                 |      | C5 H8 F3 N5              | 195.07315  | 1.282    |
| Level 4                 |      | C5 H8 N2                 | 96.0687    | 1.381    |
| Level 4                 |      | C5 H8 N6 O2              | 184.07108  | 6.179    |
| Level 4                 |      | C5 H9 N3 O               | 127.07447  | 1.375    |
| Level 4                 |      | C5 H9 N3 O               | 127.07447  | 1.54     |
| Level 4                 |      | C5 H9 N3 O2              | 143.06942  | 1.231    |
| Level 4                 |      | C5 H9 O4 P               | 164.02362  | 4.666    |
| Level 4                 |      | C5 N2 S4                 | 215.8948   | 0.931    |
| Level 4                 |      | C50 H110 F3 N O2 P2 S    | 907.76848  | 25.171   |
| Level 4                 |      | C50 H110 F3 N O2 P2 S    | 907.76848  | 25.303   |
| Level 4                 |      | C50 H90 O14 S            | 946.60444  | 14.371   |
| Level 4                 |      | C51 H86 N10 O4 S         | 934.6551   | 21.274   |
| Level 4                 |      | C52 H112 F N P2 S        | 863.79411  | 28.012   |
| Level 4                 |      | C52 H76 N4 O4            | 820.58656  | 20.594   |
| Level 4                 |      | C52 H89 F6 N10 O3 P S    | 1078.64671 | 13.802   |
| Level 4                 |      | C52 H97 F9 N8 O3         | 1052.7545  | 21.97    |
| Level 4                 |      | C53 H79 F6 N10 O3 P      | 1048.59892 | 13.329   |
| Level 4                 |      | C54 H125 F4 N4 O12 P3 S2 | 1254.78803 | 15.352   |
| Level 4                 |      | C55 H100 O6              | 856.75112  | 26.209   |
| Level 4                 |      | C55 H101 N5 O2           | 863.79552  | 26.036   |
| Level 4                 |      | C55 H81 F N4 O7 S2       | 992.55307  | 8.813    |
| Level 4                 |      | C56 H59 F N2 O4          | 842.44662  | 11.07    |
| Level 4                 |      | C57 H101 F3 O4           | 906.76474  | 23.862   |
| Level 4                 |      | C57 H87 N2 O6 P3         | 988.57779  | 13.949   |
| Level 4                 |      | C57 H94 F N2 O3 P S      | 936.6707   | 21.354   |
| Level 4                 |      | C58 H94 F3 N6 O10 P      | 1122.67209 | 13.967   |

| Identification<br>level | Name | Formula             | Calc. MW  | RT [min] |
|-------------------------|------|---------------------|-----------|----------|
| Level 4                 |      | C6 H Cl N O5 P3     | 294.876   | 1.046    |
| Level 4                 |      | C6 H Cl2 N2 P3      | 263.87276 | 1.18     |
| Level 4                 |      | C6 H F2 N4 O4 P3 S2 | 387.86179 | 1.065    |
| Level 4                 |      | C6 H F2 P3          | 203.92592 | 1.057    |
| Level 4                 |      | C6 H F3 N2 O3       | 205.99391 | 1.013    |
| Level 4                 |      | C6 H F3 N2 P2 S3    | 315.87306 | 1.153    |
| Level 4                 |      | C6 H F7 O4 P2 S3    | 427.84017 | 1.012    |
| Level 4                 |      | C6 H O4 P3          | 229.90886 | 0.963    |
| Level 4                 |      | C6 H O6 P3 S2       | 325.84336 | 0.971    |
| Level 4                 |      | C6 H P3 S2          | 229.87362 | 0.948    |
| Level 4                 |      | C6 H10 Cl F5 O14    | 435.96794 | 9.126    |
| Level 4                 |      | C6 H10 N2 O2        | 142.07422 | 2.865    |
| Level 4                 |      | C6 H10 N2 O2        | 142.07425 | 9.767    |
| Level 4                 |      | C6 H10 N6 O         | 182.09175 | 6.117    |
| Level 4                 |      | C6 H10 N6 O3        | 214.08171 | 6.187    |
| Level 4                 |      | C6 H10 N6 O3        | 214.08164 | 6.765    |
| Level 4                 |      | C6 H10 O2           | 114.06812 | 8.313    |
| Level 4                 |      | C6 H10 O2           | 114.06807 | 8.5      |
| Level 4                 |      | C6 H10 O3           | 130.06303 | 8.725    |
| Level 4                 |      | C6 H11 F N O6 P     | 243.03115 | 1.741    |
| Level 4                 |      | C6 H11 F O S        | 150.0517  | 1.032    |
| Level 4                 |      | C6 H11 F3 O         | 156.07641 | 6.101    |
| Level 4                 |      | C6 H11 N O S        | 145.05625 | 7.567    |
| Level 4                 |      | C6 H11 N O S2       | 177.02835 | 9.32     |
| Level 4                 |      | C6 H11 N O2 S       | 161.05093 | 1.591    |
| Level 4                 |      | C6 H11 N O4         | 161.06873 | 1.542    |
| Level 4                 |      | C6 H11 N3 O         | 141.09025 | 2.654    |
| Level 4                 |      | C6 H11 N3 O3        | 173.08    | 1.244    |
| Level 4                 |      | C6 H11 N9           | 209.11378 | 2.172    |
| Level 4                 |      | C6 H11 N9 O2        | 241.10343 | 2.533    |
| Level 4                 |      | C6 H12 F N O4       | 181.07429 | 12.523   |
| Level 4                 |      | C6 H12 N2           | 112.1     | 1.091    |
| Level 4                 |      | C6 H12 N2 O         | 128.09488 | 1.321    |
| Level 4                 |      | C6 H12 N2 O2        | 144.09009 | 5.883    |
| Level 4                 |      | C6 H12 N2 O2        | 144.09013 | 9.536    |
| Level 4                 |      | C6 H12 N4 O         | 156.10117 | 1.183    |
| Level 4                 |      | C6 H12 N6 O         | 184.10695 | 1.815    |
| Level 4                 |      | C6 H12 N8 O2 S      | 260.07969 | 10.214   |
| Level 4                 |      | C6 H12 O2           | 116.0838  | 5.799    |
| Level 4                 |      | C6 H12 O2           | 116.08372 | 6.284    |
| Level 4                 |      | C6 H12 O2           | 116.08374 | 7.891    |
| Level 4                 |      | C6 H12 O2           | 116.08377 | 8.06     |
| Level 4                 |      | C6 H12 O2           | 116.08374 | 8.146    |
| Level 4                 |      | C6 H12 O2           | 116.08374 | 8.275    |



| Identification<br>level | Name | Formula              | Calc. MW  | RT [min] |
|-------------------------|------|----------------------|-----------|----------|
| Level 4                 |      | C6 H12 O2            | 116.08374 | 8.7      |
| Level 4                 |      | C6 H12 O2            | 116.08375 | 8.938    |
| Level 4                 |      | C6 H12 O2            | 116.08374 | 9.107    |
| Level 4                 |      | C6 H12 O2            | 116.08375 | 9.403    |
| Level 4                 |      | C6 H12 O2            | 116.08374 | 9.571    |
| Level 4                 |      | C6 H12 O2            | 116.08375 | 9.718    |
| Level 4                 |      | C6 H12 O2            | 116.08375 | 10.882   |
| Level 4                 |      | C6 H12 O3            | 132.07865 | 5.542    |
| Level 4                 |      | C6 H12 O3            | 132.07865 | 7.528    |
| Level 4                 |      | C6 H12 O3            | 132.07863 | 8.273    |
| Level 4                 |      | C6 H12 O4            | 148.07359 | 4.923    |
| Level 4                 |      | C6 H12 O4            | 148.07346 | 8.112    |
| Level 4                 |      | C6 H12 O4            | 148.07358 | 11.721   |
| Level 4                 |      | C6 H12 O5            | 164.06846 | 10.843   |
| Level 4                 |      | C6 H13 Cl2 N O2      | 201.0322  | 1.44     |
| Level 4                 |      | C6 H13 F N3 P S2     | 241.02651 | 9.932    |
| Level 4                 |      | C6 H13 F2 N3 S       | 197.0799  | 5.246    |
| Level 4                 |      | C6 H13 F3 O3 S2      | 254.02508 | 5.536    |
| Level 4                 |      | C6 H13 N O S2        | 179.04398 | 10.7     |
| Level 4                 |      | C6 H13 N O5          | 161.06882 | 1.717    |
| Level 4                 |      | C6 H14 F N O5 S      | 231.05672 | 7.733    |
| Level 4                 |      | C6 H14 F N5 O5       | 255.09746 | 16.247   |
| Level 4                 |      | C6 H14 N2 O2         | 146.10542 | 1.305    |
| Level 4                 |      | C6 H15 F11 N10 S     | 468.10225 | 19.269   |
| Level 4                 |      | C6 H15 F3 N10 S      | 316.11522 | 9.767    |
| Level 4                 |      | C6 H15 N S2          | 165.06503 | 1.609    |
| Level 4                 |      | C6 H15 O7 P          | 230.05541 | 2.234    |
| Level 4                 |      | C6 H16 F N O8        | 249.0864  | 6.742    |
| Level 4                 |      | C6 H16 F N2 P S      | 198.07526 | 1.503    |
| Level 4                 |      | C6 H16 F2 N2 O4 S    | 250.07916 | 8.729    |
| Level 4                 |      | C6 H16 F2 N2 S       | 186.10044 | 1.126    |
| Level 4                 |      | C6 H16 F2 N3 O5 P    | 279.07891 | 13.489   |
| Level 4                 |      | C6 H16 F3 N S        | 191.09481 | 11.025   |
| Level 4                 |      | C6 H16 F5 N O2       | 229.11032 | 6.037    |
| Level 4                 |      | C6 H17 F N2 O4 S2    | 264.06078 | 8.324    |
| Level 4                 |      | C6 H17 F3 N O3 P     | 239.09049 | 5.454    |
| Level 4                 |      | C6 H17 F4 N5 O       | 251.137   | 1.716    |
| Level 4                 |      | C6 H17 N O3          | 151.12098 | 5.8      |
| Level 4                 |      | C6 H17 N4 O2 P S2    | 272.05217 | 7.109    |
| Level 4                 |      | C6 H17 N9 O3         | 263.14472 | 10.175   |
| Level 4                 |      | C6 H18 Cl F N2 O2 S4 | 331.99303 | 29.359   |
| Level 4                 |      | C6 H18 F N O7        | 235.107   | 2.924    |
| Level 4                 |      | C6 H18 F5 N O2       | 231.12596 | 17.446   |
| Level 4                 |      | C6 H18 N4 S2         | 210.09735 | 1.713    |

| Identification<br>level | Name | Formula              | Calc. MW  | RT [min] |
|-------------------------|------|----------------------|-----------|----------|
| Level 4                 |      | C6 H18 S2 Sn3        | 513.79296 | 1.006    |
| Level 4                 |      | C6 H19 F O2 S2       | 206.08066 | 8.798    |
| Level 4                 |      | C6 H19 F2 N O S      | 191.11564 | 1.375    |
| Level 4                 |      | C6 H19 F4 N5         | 237.15739 | 10.844   |
| Level 4                 |      | C6 H19 N7 S          | 221.14158 | 9.355    |
| Level 4                 |      | C6 H2 Cl F2 O P3     | 255.89723 | 1.103    |
| Level 4                 |      | C6 H2 F N3 O P2 S2   | 276.90989 | 1.06     |
| Level 4                 |      | C6 H2 F2 N O8 P3 S   | 378.86849 | 0.957    |
| Level 4                 |      | C6 H2 F2 P2 S3       | 269.87628 | 1.063    |
| Level 4                 |      | C6 H2 F3 N O15 S     | 416.90954 | 0.862    |
| Level 4                 |      | C6 H2 F4 N2 O        | 194.01032 | 1.18     |
| Level 4                 |      | C6 H2 N4 O P2 S3     | 303.88674 | 1.049    |
| Level 4                 |      | C6 H20 F N6 O2 P     | 258.13687 | 16.155   |
| Level 4                 |      | C6 H20 F3 N2 O4 P S  | 304.084   | 7.124    |
| Level 4                 |      | C6 H20 F8            | 244.14372 | 18.983   |
| Level 4                 |      | C6 H20 N O6 P        | 233.1028  | 10.775   |
| Level 4                 |      | C6 H20 N10 O3        | 280.17128 | 10.479   |
| Level 4                 |      | C6 H21 F2 N O S      | 193.13136 | 1.239    |
| Level 4                 |      | C6 H21 F2 N S        | 177.13633 | 2.022    |
| Level 4                 |      | C6 H21 F3 N3 O3 P    | 271.1278  | 1.621    |
| Level 4                 |      | C6 H21 F5 O          | 204.15151 | 18.989   |
| Level 4                 |      | C6 H21 N3 O P2       | 213.11565 | 16.304   |
| Level 4                 |      | C6 H21 N3 P2         | 197.12065 | 18.797   |
| Level 4                 |      | C6 H3 Br F6 N O6 P3  | 470.82453 | 1.035    |
| Level 4                 |      | C6 H3 Cl F3 N O5     | 260.96454 | 0.847    |
| Level 4                 |      | C6 H3 F O2 S2        | 189.95549 | 0.946    |
| Level 4                 |      | C6 H3 F2 O5 P3 S     | 317.8883  | 0.883    |
| Level 4                 |      | C6 H3 F3 O4 P2 S2    | 321.89    | 1.081    |
| Level 4                 |      | C6 H3 F5 N O9 P3     | 420.89446 | 1.245    |
| Level 4                 |      | C6 H3 N3 O P2 S3     | 290.89171 | 1.249    |
| Level 4                 |      | C6 H3 N4 O7 P3 S2    | 399.86546 | 1.073    |
| Level 4                 |      | C6 H4 Br Cl F2 N2    | 255.9222  | 1.068    |
| Level 4                 |      | C6 H4 Cl3 F O8 S     | 359.86854 | 12.574   |
| Level 4                 |      | C6 H4 F11 P S        | 347.95972 | 5.587    |
| Level 4                 |      | C6 H4 F3 N O7 P2 S2  | 384.88553 | 1.012    |
| Level 4                 |      | C6 H4 F5 N S2        | 248.97061 | 1.243    |
| Level 4                 |      | C6 H4 F7 O4 P3 S3    | 461.83743 | 1.026    |
| Level 4                 |      | C6 H4 F7 O6 P3       | 397.91091 | 1.227    |
| Level 4                 |      | C6 H4 I N O          | 232.93334 | 0.944    |
| Level 4                 |      | C6 H5 Cl Mg          | 135.99337 | 0.954    |
| Level 4                 |      | C6 H5 Cl N5 O2 P     | 244.98704 | 0.91     |
| Level 4                 |      | C6 H5 Cl2 F N O P S2 | 290.89162 | 1.142    |
| Level 4                 |      | C6 H5 F5 N2 P2       | 261.98479 | 1.122    |
| Level 4                 |      | C6 H5 I O4 S         | 299.89552 | 0.995    |

| Identification<br>level | Name | Formula                | Calc. MW   | RT [min] |
|-------------------------|------|------------------------|------------|----------|
| Level 4                 |      | C6 H6 Cl F4 N4 O7 P S4 | 515.84807  | 12.564   |
| Level 4                 |      | C6 H6 Cl N4 O2 P       | 231.99175  | 0.917    |
| Level 4                 |      | C6 H6 N10 O            | 234.07293  | 6.094    |
| Level 4                 |      | C6 H6 N2 O2            | 138.04294  | 1.895    |
| Level 4                 |      | C6 H6 N3 O5 P3 S3      | 388.86621  | 1.045    |
| Level 4                 |      | C6 H6 N4 O             | 150.05424  | 5.266    |
| Level 4                 |      | C6 H6 O2               | 110.03675  | 16.737   |
| Level 4                 |      | C6 H7 F N O11 P S3     | 414.8901   | 1.191    |
| Level 4                 |      | C6 H7 F N O7 P3 S3     | 412.85787  | 1.177    |
| Level 4                 |      | C6 H7 N O S            | 141.02494  | 5.861    |
| Level 4                 |      | C6 H7 N O2             | 125.04758  | 1.757    |
| Level 4                 |      | C6 H7 N O2 S           | 157.01981  | 5.397    |
| Level 4                 |      | C6 H7 N3 O2            | 153.05378  | 2.604    |
| Level 4                 |      | C6 H7 N3 O2            | 153.05377  | 2.913    |
| Level 4                 |      | C6 H7 N5 O             | 165.06503  | 1.74     |
| Level 4                 |      | C6 H7 N5 O S           | 197.03734  | 4.561    |
| Level 4                 |      | C6 H7 N5 S             | 181.04224  | 7.456    |
| Level 4                 |      | C6 H8 Cl N4 O7 P       | 313.98231  | 29.353   |
| Level 4                 |      | C6 H8 F3 N O2          | 183.05068  | 1.477    |
| Level 4                 |      | C6 H8 N2 O2            | 140.0587   | 2.037    |
| Level 4                 |      | C6 H8 N4 O2 S          | 200.03662  | 2.598    |
| Level 4                 |      | C6 H8 N6 O2            | 196.07123  | 9.952    |
| Level 4                 |      | C6 H8 O4 S3            | 239.95827  | 1.138    |
| Level 4                 |      | C6 H9 Br3 O            | 333.82084  | 1.108    |
| Level 4                 |      | C6 H9 F3 O2            | 170.05558  | 4.946    |
| Level 4                 |      | C6 H9 N O3             | 143.05821  | 1.665    |
| Level 4                 |      | C6 H9 N3 O             | 139.07449  | 1.415    |
| Level 4                 |      | C6 H9 N3 O             | 139.07459  | 3.513    |
| Level 4                 |      | C6 H9 N3 O             | 139.07458  | 4.027    |
| Level 4                 |      | C6 H9 N5 O             | 167.08076  | 3.91     |
| Level 4                 |      | C60 H111 F13 N2 O9 P2  | 1312.75585 | 14.271   |
| Level 4                 |      | C60 H118 F13 O13 P S   | 1356.78214 | 14.403   |
| Level 4                 |      | C62 H84 N8 O2 P2       | 1034.62037 | 13.627   |
| Level 4                 |      | C62 H97 F7 N2 O3       | 1050.73874 | 21.893   |
| Level 4                 |      | C64 H86 F O2 P         | 936.63525  | 20.745   |
| Level 4                 |      | C64 H87 F8 N4 O4 P3 S  | 1252.55284 | 7.103    |
| Level 4                 |      | C7 H Br F N2 O2 P3 S   | 367.81333  | 0.938    |
| Level 4                 |      | C7 H Cl2 F N2 S        | 233.92271  | 12.569   |
| Level 4                 |      | C7 H Cl2 O7 P3         | 359.83103  | 0.936    |
| Level 4                 |      | C7 H F N4 O2 S3        | 287.92455  | 1.146    |
| Level 4                 |      | C7 H F2 O P3           | 231.92073  | 0.849    |
| Level 4                 |      | C7 H F2 O P3           | 231.9207   | 1.18     |
| Level 4                 |      | C7 H F6 N3 O4 P2 S2    | 430.87865  | 1.029    |
| Level 4                 |      | C7 H F7 P2 S5          | 439.80336  | 1.063    |

| Identification<br>level | Name | Formula            | Calc. MW  | RT [min] |
|-------------------------|------|--------------------|-----------|----------|
| Level 4                 |      | C7 H F9 N6 O8 P2   | 529.91874 | 0.962    |
| Level 4                 |      | C7 H N4 O18 P3 S2  | 585.79416 | 17.869   |
| Level 4                 |      | C7 H10 F2 S        | 164.04765 | 10.017   |
| Level 4                 |      | C7 H10 F3 O3 P     | 230.03255 | 13.61    |
| Level 4                 |      | C7 H10 N2 O        | 138.07926 | 1.225    |
| Level 4                 |      | C7 H10 N2 O        | 138.07946 | 6.53     |
| Level 4                 |      | C7 H10 N2 O S      | 170.05149 | 6.771    |
| Level 4                 |      | C7 H10 N2 O2       | 154.07411 | 1.411    |
| Level 4                 |      | C7 H10 N2 O2       | 154.07412 | 1.824    |
| Level 4                 |      | C7 H10 N2 O2       | 154.07415 | 5.904    |
| Level 4                 |      | C7 H10 N2 O2 S     | 186.0465  | 2.089    |
| Level 4                 |      | C7 H10 N2 O3       | 170.06911 | 2.565    |
| Level 4                 |      | C7 H10 N4 O3       | 198.0754  | 4.861    |
| Level 4                 |      | C7 H10 O3          | 142.06308 | 5.945    |
| Level 4                 |      | C7 H11 Br F2 S     | 243.97397 | 1.068    |
| Level 4                 |      | C7 H11 F3 O2       | 184.07084 | 8.003    |
| Level 4                 |      | C7 H11 F4 N9       | 297.10741 | 5.504    |
| Level 4                 |      | C7 H11 N O2        | 141.07911 | 4.905    |
| Level 4                 |      | C7 H11 N O2        | 141.07915 | 5.947    |
| Level 4                 |      | C7 H11 N3          | 137.09523 | 1.209    |
| Level 4                 |      | C7 H11 N3 O        | 153.09041 | 6.123    |
| Level 4                 |      | C7 H11 N3 O S      | 185.0622  | 1.488    |
| Level 4                 |      | C7 H11 N3 O2       | 169.08502 | 1.511    |
| Level 4                 |      | C7 H11 N3 O3       | 185.07992 | 1.431    |
| Level 4                 |      | C7 H11 N9 O2       | 253.10335 | 1.687    |
| Level 4                 |      | C7 H12 F4 N4       | 228.09976 | 17.109   |
| Level 4                 |      | C7 H12 N10 O       | 252.11925 | 1.888    |
| Level 4                 |      | C7 H12 N2 O        | 140.09487 | 1.205    |
| Level 4                 |      | C7 H12 N2 O        | 140.0948  | 1.936    |
| Level 4                 |      | C7 H12 N2 O        | 140.0952  | 7.717    |
| Level 4                 |      | C7 H12 N2 O2 S     | 188.0621  | 9.058    |
| Level 4                 |      | C7 H12 N4 O2       | 184.09611 | 2.846    |
| Level 4                 |      | C7 H12 N4 O3       | 200.09091 | 1.289    |
| Level 4                 |      | C7 H12 N6 O        | 196.10731 | 5.505    |
| Level 4                 |      | C7 H13 F2 N O S    | 197.06894 | 10.734   |
| Level 4                 |      | C7 H13 F2 N S      | 181.07436 | 12.371   |
| Level 4                 |      | C7 H13 N O2        | 143.09471 | 5.619    |
| Level 4                 |      | C7 H13 N2 S        | 157.07956 | 5.798    |
| Level 4                 |      | C7 H13 N3 O4       | 203.09059 | 1.068    |
| Level 4                 |      | C7 H14 N6 O2       | 214.11791 | 6.13     |
| Level 4                 |      | C7 H14 O3          | 146.09444 | 7.582    |
| Level 4                 |      | C7 H14 O4          | 162.08928 | 5.486    |
| Level 4                 |      | C7 H14 O4          | 162.08932 | 7.995    |
| Level 4                 |      | C7 H15 Cl2 N2 O2 P | 260.02476 | 11.63    |

| Identification<br>level | Name | Formula             | Calc. MW  | RT [min] |
|-------------------------|------|---------------------|-----------|----------|
| Level 4                 |      | C7 H15 F N2 O3      | 194.10613 | 11.155   |
| Level 4                 |      | C7 H15 F N5 P S2    | 283.04906 | 12.039   |
| Level 4                 |      | C7 H15 F2 N O S     | 199.08424 | 1.395    |
| Level 4                 |      | C7 H15 F2 N S2      | 215.06185 | 11.304   |
| Level 4                 |      | C7 H15 F2 N3 O S    | 227.09037 | 1.97     |
| Level 4                 |      | C7 H15 F2 N3 O2 S   | 243.08532 | 1.631    |
| Level 4                 |      | C7 H15 F9 N2        | 298.10993 | 9.188    |
| Level 4                 |      | C7 H15 N O S3       | 225.03169 | 9.921    |
| Level 4                 |      | C7 H15 N9 O2        | 257.13465 | 1.895    |
| Level 4                 |      | C7 H15 N9 O2        | 257.13451 | 3.052    |
| Level 4                 |      | C7 H16 F P S        | 182.06943 | 1.414    |
| Level 4                 |      | C7 H16 F2 N2 O S    | 214.09523 | 1.678    |
| Level 4                 |      | C7 H16 N2 O3        | 176.116   | 1.168    |
| Level 4                 |      | C7 H17 F N2 O2 S2   | 244.07118 | 8.719    |
| Level 4                 |      | C7 H17 F N4 O2 S    | 240.10621 | 2.534    |
| Level 4                 |      | C7 H17 F O2 S2      | 216.06493 | 7.896    |
| Level 4                 |      | C7 H17 N O2         | 147.12588 | 1.311    |
| Level 4                 |      | C7 H17 N O2 S       | 179.09786 | 1.1      |
| Level 4                 |      | C7 H17 N O4         | 179.11563 | 1.655    |
| Level 4                 |      | C7 H18 F2 N O2 P S  | 249.0768  | 11.098   |
| Level 4                 |      | C7 H18 F2 N6 S      | 256.12866 | 12.864   |
| Level 4                 |      | C7 H18 F3 N O8      | 301.09858 | 9.929    |
| Level 4                 |      | C7 H18 F4 N4        | 234.14674 | 9.615    |
| Level 4                 |      | C7 H19 Cl F2 O2 S   | 240.07651 | 7.879    |
| Level 4                 |      | C7 H19 F N10        | 262.17809 | 16.3     |
| Level 4                 |      | C7 H19 F O2 S2      | 218.08055 | 11.571   |
| Level 4                 |      | C7 H19 F O7         | 234.11162 | 12.922   |
| Level 4                 |      | C7 H19 F3 N3 O2 P   | 265.11733 | 7.482    |
| Level 4                 |      | C7 H19 F4 N5        | 249.15754 | 7.283    |
| Level 4                 |      | C7 H19 N3           | 145.15792 | 1.137    |
| Level 4                 |      | C7 H19 N3           | 145.15786 | 1.251    |
| Level 4                 |      | C7 H19 N7 O8        | 329.12969 | 7.801    |
| Level 4                 |      | C7 H2 Cl F2 N       | 172.98447 | 1.155    |
| Level 4                 |      | C7 H2 Cl N2 O2 P3   | 273.90178 | 1.238    |
| Level 4                 |      | C7 H2 F2 N O2 P3 S3 | 358.84252 | 1.23     |
| Level 4                 |      | C7 H2 F2 N P        | 168.98974 | 0.936    |
| Level 4                 |      | C7 H2 F2 N P S2     | 232.93338 | 0.991    |
| Level 4                 |      | C7 H2 F2 O2 P2      | 217.95032 | 1.343    |
| Level 4                 |      | C7 H2 F3 O15 P3 S2  | 539.79872 | 1.038    |
| Level 4                 |      | C7 H2 F5 N2 P3 S    | 333.90715 | 1.294    |
| Level 4                 |      | C7 H2 P2 S3         | 243.87885 | 1.11     |
| Level 4                 |      | C7 H20 F N8 O P S   | 314.11905 | 14.435   |
| Level 4                 |      | C7 H20 F P S        | 186.10079 | 9.537    |
| Level 4                 |      | C7 H20 F2 O S       | 190.12037 | 10.667   |

| Identification<br>level | Name | Formula                | Calc. MW  | RT [min] |
|-------------------------|------|------------------------|-----------|----------|
| Level 4                 |      | C7 H20 F2 O S          | 190.12065 | 12.775   |
| Level 4                 |      | C7 H20 F4 N4 O         | 252.15769 | 8.002    |
| Level 4                 |      | C7 H20 N4 O S2         | 240.10765 | 2.58     |
| Level 4                 |      | C7 H20 N9 O P          | 277.1527  | 10.711   |
| Level 4                 |      | C7 H21 F O3 S2         | 236.09116 | 5.441    |
| Level 4                 |      | C7 H22 F N O3 S2       | 251.10187 | 8.667    |
| Level 4                 |      | C7 H22 F N5 O3         | 243.1709  | 7.917    |
| Level 4                 |      | C7 H22 F3 N O4 S       | 273.12248 | 12.86    |
| Level 4                 |      | C7 H22 F5 N O          | 231.16264 | 7.537    |
| Level 4                 |      | C7 H23 F2 N O4 S       | 255.13163 | 4.59     |
| Level 4                 |      | C7 H23 F4 N5 O         | 269.18376 | 5.483    |
| Level 4                 |      | C7 H23 F4 O2 P         | 246.13703 | 11.64    |
| Level 4                 |      | C7 H23 F5 O5           | 282.14652 | 17.34    |
| Level 4                 |      | C7 H3 Br F4            | 241.93542 | 0.956    |
| Level 4                 |      | C7 H3 Br2 F2 N O2      | 328.85082 | 1.024    |
| Level 4                 |      | C7 H3 Cl2 N O5 S       | 282.9101  | 1.049    |
| Level 4                 |      | C7 H3 Cl2 O8 P3        | 377.84151 | 0.932    |
| Level 4                 |      | C7 H3 F O S2           | 185.96061 | 0.949    |
| Level 4                 |      | C7 H3 F2 N O S3        | 250.93445 | 1.251    |
| Level 4                 |      | C7 H3 F2 O4 P3         | 281.92117 | 1.058    |
| Level 4                 |      | C7 H3 N6 P3 S2         | 327.90697 | 1.064    |
| Level 4                 |      | C7 H4 Cl F2 P3         | 253.91803 | 0.941    |
| Level 4                 |      | C7 H4 Cl N6 O6 P3 S2   | 459.85328 | 1.21     |
| Level 4                 |      | C7 H4 Cl P S3          | 249.89047 | 1.224    |
| Level 4                 |      | C7 H4 F2 O S           | 173.99529 | 0.938    |
| Level 4                 |      | C7 H6                  | 90.04677  | 5.389    |
| Level 4                 |      | C7 H6 F2 N4 O          | 200.05099 | 9.827    |
| Level 4                 |      | C7 H6 F2 O3 P2         | 237.97587 | 29.351   |
| Level 4                 |      | C7 H6 N2 O S           | 166.02022 | 7.148    |
| Level 4                 |      | C7 H6 N2 S             | 150.02515 | 9.637    |
| Level 4                 |      | C7 H6 N4 O3            | 194.04428 | 6.373    |
| Level 4                 |      | C7 H7 Cl2 O3 P3 S3     | 397.8141  | 1.055    |
| Level 4                 |      | C7 H7 N O S            | 153.0249  | 8.917    |
| Level 4                 |      | C7 H7 N O3             | 153.04247 | 1.524    |
| Level 4                 |      | C7 H7 N3               | 133.06413 | 9.585    |
| Level 4                 |      | C7 H7 N3 O             | 149.05887 | 1.835    |
| Level 4                 |      | C7 H7 N3 O             | 149.059   | 9.953    |
| Level 4                 |      | C7 H7 N3 O             | 149.05897 | 10.194   |
| Level 4                 |      | C7 H7 N5 O             | 177.06513 | 4.872    |
| Level 4                 |      | C7 H8 Br Cl8 F2 O5 P S | 631.64944 | 0.937    |
| Level 4                 |      | C7 H8 Cl N3            | 169.04074 | 6.99     |
| Level 4                 |      | C7 H8 Cl N4 O2 P       | 246.00741 | 0.902    |
| Level 4                 |      | C7 H8 N2 O2            | 152.05855 | 1.419    |
| Level 4                 |      | C7 H8 N2 O2            | 152.05858 | 7.079    |

| Identification<br>level | Name | Formula            | Calc. MW  | RT [min] |
|-------------------------|------|--------------------|-----------|----------|
| Level 4                 |      | C7 H8 N4 O         | 164.06993 | 4.789    |
| Level 4                 |      | C7 H8 N4 O2        | 180.0649  | 4.705    |
| Level 4                 |      | C7 H8 N4 O3        | 196.05976 | 6.861    |
| Level 4                 |      | C7 H8 O4           | 156.04242 | 5.766    |
| Level 4                 |      | C7 H8 O4           | 156.04239 | 13.895   |
| Level 4                 |      | C7 H9 F N3 O P     | 201.04632 | 2.057    |
| Level 4                 |      | C7 H9 F3 O2        | 182.05586 | 9.246    |
| Level 4                 |      | C7 H9 F4 N5        | 239.07954 | 7.811    |
| Level 4                 |      | C7 H9 N O S        | 155.04054 | 7.624    |
| Level 4                 |      | C7 H9 N O2         | 139.06336 | 2.487    |
| Level 4                 |      | C7 H9 N O2         | 139.06337 | 3.687    |
| Level 4                 |      | C7 H9 N O2 S       | 171.03549 | 8.704    |
| Level 4                 |      | C7 H9 N O2 S       | 171.03537 | 9.561    |
| Level 4                 |      | C7 H9 N O3         | 155.05836 | 1.866    |
| Level 4                 |      | C7 H9 N O3         | 155.05831 | 6.438    |
| Level 4                 |      | C7 H9 N O3 S       | 187.03021 | 1.832    |
| Level 4                 |      | C7 H9 N3 O         | 151.0746  | 2.694    |
| Level 4                 |      | C7 H9 N5           | 163.08587 | 5.091    |
| Level 4                 |      | C7 H9 N5 O         | 179.08073 | 2.232    |
| Level 4                 |      | C7 H9 N5 O         | 179.08078 | 6.965    |
| Level 4                 |      | C7 H9 N5 O S       | 211.05303 | 6.12     |
| Level 4                 |      | C8 H F2 N2 O P3 S2 | 335.87205 | 1.056    |
| Level 4                 |      | C8 H N2 O3 P3 S    | 297.89222 | 1.079    |
| Level 4                 |      | C8 H O9 P3         | 333.88359 | 1.077    |
| Level 4                 |      | C8 H10 Cl N5       | 211.06251 | 7.812    |
| Level 4                 |      | C8 H10 N2 O        | 150.07924 | 1.427    |
| Level 4                 |      | C8 H10 N2 O2       | 166.07439 | 1.464    |
| Level 4                 |      | C8 H10 N2 O2       | 166.07437 | 1.992    |
| Level 4                 |      | C8 H10 N2 O2       | 166.07438 | 2.37     |
| Level 4                 |      | C8 H10 N2 O2       | 166.0744  | 6.868    |
| Level 4                 |      | C8 H10 N2 O2       | 166.07442 | 7.248    |
| Level 4                 |      | C8 H10 N2 O2       | 166.07434 | 9.246    |
| Level 4                 |      | C8 H10 N2 O3       | 182.06923 | 5.12     |
| Level 4                 |      | C8 H10 N4 O2 S     | 226.05243 | 8.171    |
| Level 4                 |      | C8 H10 N4 O2 S     | 226.05247 | 9.185    |
| Level 4                 |      | C8 H10 N4 O3       | 210.07542 | 7.711    |
| Level 4                 |      | C8 H10 N4 O3 S     | 242.0475  | 5.53     |
| Level 4                 |      | C8 H10 N6 O        | 206.09152 | 1.713    |
| Level 4                 |      | C8 H10 O3 S        | 186.03535 | 7.917    |
| Level 4                 |      | C8 H10 O3 S        | 186.03534 | 8.839    |
| Level 4                 |      | C8 H10 O3 S        | 186.03528 | 9.308    |
| Level 4                 |      | C8 H10 O4          | 170.05798 | 7.785    |
| Level 4                 |      | C8 H11 N O2        | 153.07906 | 3.81     |
| Level 4                 |      | C8 H11 N O2        | 153.07924 | 7.411    |

| Identification<br>level | Name | Formula         | Calc. MW  | RT [min] |
|-------------------------|------|-----------------|-----------|----------|
| Level 4                 |      | C8 H11 N O2 S   | 185.05121 | 5.887    |
| Level 4                 |      | C8 H11 N O2 S   | 185.05112 | 6.695    |
| Level 4                 |      | C8 H11 N O3     | 169.07395 | 1.253    |
| Level 4                 |      | C8 H11 N O3     | 169.07424 | 3.625    |
| Level 4                 |      | C8 H11 N O3     | 169.0739  | 5.395    |
| Level 4                 |      | C8 H11 N O3 S   | 201.04623 | 2.259    |
| Level 4                 |      | C8 H11 N5 O     | 193.09653 | 6.295    |
| Level 4                 |      | C8 H11 N5 O     | 193.09652 | 8.239    |
| Level 4                 |      | C8 H12 F3 N3 O  | 223.093   | 3.392    |
| Level 4                 |      | C8 H12 N10      | 248.12463 | 3.865    |
| Level 4                 |      | C8 H12 N2 O2 S2 | 232.03405 | 5.259    |
| Level 4                 |      | C8 H12 N2 O3    | 184.08472 | 1.417    |
| Level 4                 |      | C8 H12 N2 O3    | 184.08493 | 3.516    |
| Level 4                 |      | C8 H12 N2 O3 S2 | 248.02917 | 2.255    |
| Level 4                 |      | C8 H12 N4 O     | 180.10085 | 2.353    |
| Level 4                 |      | C8 H12 N4 O3    | 212.09112 | 5.523    |
| Level 4                 |      | C8 H12 N4 O3    | 212.09114 | 6.097    |
| Level 4                 |      | C8 H12 N6 O     | 208.10736 | 8.087    |
| Level 4                 |      | C8 H12 N6 O2    | 224.10264 | 12.959   |
| Level 4                 |      | C8 H12 O3 S     | 188.05102 | 7.205    |
| Level 4                 |      | C8 H12 O4       | 154.06312 | 8.96     |
| Level 4                 |      | C8 H12 O5       | 188.06866 | 6.53     |
| Level 4                 |      | C8 H13 N O      | 139.09969 | 9.729    |
| Level 4                 |      | C8 H13 N O2     | 155.09485 | 6.355    |
| Level 4                 |      | C8 H13 N O2     | 155.09477 | 7.555    |
| Level 4                 |      | C8 H13 N O2     | 155.0947  | 9.429    |
| Level 4                 |      | C8 H13 N O3     | 171.08966 | 7.382    |
| Level 4                 |      | C8 H13 N O4     | 209.06909 | 4.367    |
| Level 4                 |      | C8 H13 N O4     | 209.06886 | 8.077    |
| Level 4                 |      | C8 H13 N3       | 151.11088 | 1.297    |
| Level 4                 |      | C8 H13 N3 O     | 167.10607 | 6.474    |
| Level 4                 |      | C8 H13 N3 O     | 167.10604 | 7.757    |
| Level 4                 |      | C8 H13 N3 O     | 167.10606 | 7.977    |
| Level 4                 |      | C8 H13 N3 O2    | 183.1008  | 1.115    |
| Level 4                 |      | C8 H13 N3 O4 S  | 247.06091 | 13.804   |
| Level 4                 |      | C8 H14 N2 O3    | 186.10041 | 1.204    |
| Level 4                 |      | C8 H14 N2 O7    | 250.07921 | 8.124    |
| Level 4                 |      | C8 H14 N4 O2    | 198.11174 | 5.6      |
| Level 4                 |      | C8 H15 F2 N O S | 211.08444 | 5.505    |
| Level 4                 |      | C8 H15 F2 O6 P  | 276.05726 | 10.582   |
| Level 4                 |      | C8 H15 F4 N5 S  | 289.09863 | 9.783    |
| Level 4                 |      | C8 H15 N O      | 141.11545 | 1.47     |
| Level 4                 |      | C8 H15 N O S    | 173.08754 | 12.877   |
| Level 4                 |      | C8 H15 N O2     | 157.11019 | 1.064    |



| Identification<br>level | Name | Formula                | Calc. MW  | RT [min] |
|-------------------------|------|------------------------|-----------|----------|
| Level 4                 |      | C8 H15 N O2            | 157.11037 | 6.755    |
| Level 4                 |      | C8 H15 N O2            | 157.11053 | 7.186    |
| Level 4                 |      | C8 H15 N O3            | 173.1056  | 7.56     |
| Level 4                 |      | C8 H15 N O5            | 205.09498 | 1.859    |
| Level 4                 |      | C8 H15 N3 O3           | 201.11152 | 2.455    |
| Level 4                 |      | C8 H16 F N2 P S        | 222.07535 | 7.802    |
| Level 4                 |      | C8 H16 F N3 O3         | 221.11677 | 12.728   |
| Level 4                 |      | C8 H16 F2 O S2         | 230.06159 | 10.454   |
| Level 4                 |      | C8 H16 F2 S            | 182.09439 | 6.667    |
| Level 4                 |      | C8 H16 N2 O2           | 172.12122 | 1.089    |
| Level 4                 |      | C8 H16 N2 O3           | 188.11618 | 1.199    |
| Level 4                 |      | C8 H16 N2 O4           | 204.11103 | 11.459   |
| Level 4                 |      | C8 H16 N4 O3           | 216.12247 | 5.79     |
| Level 4                 |      | C8 H16 O3              | 160.10994 | 7.959    |
| Level 4                 |      | C8 H16 O3              | 160.10988 | 8.134    |
| Level 4                 |      | C8 H16 O3              | 160.10992 | 8.922    |
| Level 4                 |      | C8 H16 O3              | 160.10992 | 9.101    |
| Level 4                 |      | C8 H16 O3              | 182.09432 | 16.975   |
| Level 4                 |      | C8 H16 O3              | 182.09436 | 17.156   |
| Level 4                 |      | C8 H16 O3              | 182.09436 | 17.646   |
| Level 4                 |      | C8 H16 O5              | 192.09987 | 6.752    |
| Level 4                 |      | C8 H16 O5              | 192.09987 | 7.007    |
| Level 4                 |      | C8 H17 Cl F N2 O2 P3 S | 351.98966 | 12.621   |
| Level 4                 |      | C8 H17 F2 N O2 S       | 229.09494 | 3.643    |
| Level 4                 |      | C8 H17 F3 N3 P S       | 275.08294 | 10.256   |
| Level 4                 |      | C8 H17 F7 N4 O         | 318.12919 | 6.062    |
| Level 4                 |      | C8 H17 N O2            | 159.1259  | 4.127    |
| Level 4                 |      | C8 H17 N O3            | 175.12069 | 1.361    |
| Level 4                 |      | C8 H17 N O5            | 207.11195 | 5.469    |
| Level 4                 |      | C8 H18 F O2 P3         | 258.05043 | 9.307    |
| Level 4                 |      | C8 H18 F4 N10          | 330.16548 | 12.203   |
| Level 4                 |      | C8 H18 F4 N2 O S3      | 330.05137 | 13.704   |
| Level 4                 |      | C8 H18 N2 O S2         | 222.08651 | 8.043    |
| Level 4                 |      | C8 H18 N2 O2           | 174.13686 | 1.092    |
| Level 4                 |      | C8 H18 N8 O2 S2        | 322.10022 | 10.234   |
| Level 4                 |      | C8 H18 N8 O2 S2        | 322.1003  | 11.152   |
| Level 4                 |      | C8 H19 F N2 O8 S       | 322.08535 | 13.949   |
| Level 4                 |      | C8 H19 F2 N S          | 199.12071 | 2.383    |
| Level 4                 |      | C8 H19 F3 O8           | 300.10351 | 12.966   |
| Level 4                 |      | C8 H19 N O             | 145.14677 | 5.001    |
| Level 4                 |      | C8 H19 N O2            | 161.1415  | 1.266    |
| Level 4                 |      | C8 H19 O5 P            | 226.09704 | 7.911    |
| Level 4                 |      | C8 H2 Br F2 O P        | 261.89982 | 0.958    |
| Level 4                 |      | C8 H2 F3 N2 O9 P3 S    | 451.86458 | 1.074    |

| Identification<br>level | Name | Formula             | Calc. MW  | RT [min] |
|-------------------------|------|---------------------|-----------|----------|
| Level 4                 |      | C8 H20 F N O8       | 277.11752 | 12.762   |
| Level 4                 |      | C8 H20 F N O8       | 277.11753 | 12.878   |
| Level 4                 |      | C8 H20 F N5 O       | 221.16548 | 8.632    |
| Level 4                 |      | C8 H20 F2 N2 O8     | 310.11832 | 13.665   |
| Level 4                 |      | C8 H20 F2 N2 S      | 214.13156 | 1.42     |
| Level 4                 |      | C8 H20 F2 O2 S      | 218.1155  | 10.031   |
| Level 4                 |      | C8 H20 F2 O3 S      | 234.11022 | 5.474    |
| Level 4                 |      | C8 H20 N2 O3        | 192.14735 | 1.28     |
| Level 4                 |      | C8 H20 N8 O S       | 276.14763 | 11.244   |
| Level 4                 |      | C8 H21 Cl F3 N S    | 255.10317 | 10.79    |
| Level 4                 |      | C8 H21 F N2 O6      | 260.13884 | 16.029   |
| Level 4                 |      | C8 H21 F N3 P       | 209.14534 | 14.315   |
| Level 4                 |      | C8 H21 F2 N O S     | 217.13137 | 8.045    |
| Level 4                 |      | C8 H21 F3 N O P     | 235.13198 | 8.302    |
| Level 4                 |      | C8 H21 F4 N4 P      | 280.14397 | 16.781   |
| Level 4                 |      | C8 H21 F4 N5 O2     | 295.16289 | 2.691    |
| Level 4                 |      | C8 H21 N O3         | 179.1521  | 6.28     |
| Level 4                 |      | C8 H21 N3           | 159.17348 | 1.142    |
| Level 4                 |      | C8 H21 N3           | 159.17349 | 1.248    |
| Level 4                 |      | C8 H21 N3 S3        | 255.0896  | 14.908   |
| Level 4                 |      | C8 H21 N7 S         | 247.15746 | 7.243    |
| Level 4                 |      | C8 H22 F N O2 S2    | 247.10724 | 9.493    |
| Level 4                 |      | C8 H22 F P S        | 200.1162  | 1.095    |
| Level 4                 |      | C8 H22 F3 N2 P      | 234.14672 | 13.571   |
| Level 4                 |      | C8 H22 F6 N10 O S   | 420.1606  | 6.861    |
| Level 4                 |      | C8 H22 O S2         | 198.11187 | 9.413    |
| Level 4                 |      | C8 H23 Cl F5 N3     | 291.15059 | 15.067   |
| Level 4                 |      | C8 H23 F N2 O5      | 246.15926 | 17.527   |
| Level 4                 |      | C8 H23 F O3 S       | 218.13454 | 14.624   |
| Level 4                 |      | C8 H23 F2 N O2 P2 S | 297.09001 | 9.186    |
| Level 4                 |      | C8 H23 F2 N O3 S    | 251.13689 | 7.278    |
| Level 4                 |      | C8 H23 F2 N O4      | 235.16034 | 8.142    |
| Level 4                 |      | C8 H23 F2 N O4 P2   | 297.10736 | 4.98     |
| Level 4                 |      | C8 H24 F N5 O4      | 273.18064 | 20.079   |
| Level 4                 |      | C8 H24 F N7 O2 P2   | 331.14545 | 15.305   |
| Level 4                 |      | C8 H24 F O P3       | 248.10237 | 11.284   |
| Level 4                 |      | C8 H24 N O6 P       | 261.13395 | 15.042   |
| Level 4                 |      | C8 H24 N2 O2 P2     | 242.13097 | 15.802   |
| Level 4                 |      | C8 H24 N5 O4 P S    | 317.12986 | 14.431   |
| Level 4                 |      | C8 H24 N9 O3 P      | 325.17391 | 9.867    |
| Level 4                 |      | C8 H25 F2 N O2 S    | 237.15743 | 7.889    |
| Level 4                 |      | C8 H25 F2 N O2 S    | 237.15743 | 8.454    |
| Level 4                 |      | C8 H25 F2 N7 O3     | 305.19869 | 18.938   |
| Level 4                 |      | C8 H25 F5 N2 O2 S   | 308.15663 | 4.767    |

| Identification<br>level | Name | Formula            | Calc. MW  | RT [min] |
|-------------------------|------|--------------------|-----------|----------|
| Level 4                 |      | C8 H25 N9 O3       | 295.20735 | 8.276    |
| Level 4                 |      | C8 H26 F5 N3 O4    | 323.18437 | 14.611   |
| Level 4                 |      | C8 H26 N2 O P2     | 228.15193 | 17.82    |
| Level 4                 |      | C8 H26 N9 P        | 279.20473 | 13.394   |
| Level 4                 |      | C8 H27 F N2 O10    | 330.16548 | 12.526   |
| Level 4                 |      | C8 H27 F3 N P S    | 257.15502 | 7.772    |
| Level 4                 |      | C8 H27 F3 N3 O2 P  | 285.17967 | 5.175    |
| Level 4                 |      | C8 H27 N5 O2 S4    | 353.10466 | 10.362   |
| Level 4                 |      | C8 H28 F10 O2 P2   | 408.13933 | 6.353    |
| Level 4                 |      | C8 H28 F2 N9 P S   | 351.18945 | 12.898   |
| Level 4                 |      | C8 H28 N2 O P2     | 230.1674  | 17.066   |
| Level 4                 |      | C8 H28 N2 O P2     | 230.16729 | 17.303   |
| Level 4                 |      | C8 H3 F N P S3     | 258.91457 | 1.09     |
| Level 4                 |      | C8 H3 F7 N2 O13    | 467.95198 | 14.787   |
| Level 4                 |      | C8 H4 O3           | 148.01621 | 19.391   |
| Level 4                 |      | C8 H5 Cl2 N3 O4 S3 | 372.88061 | 0.863    |
| Level 4                 |      | C8 H5 F N6 O3      | 252.04035 | 11.111   |
| Level 4                 |      | C8 H5 F2 N6 P S5   | 413.88809 | 1.275    |
| Level 4                 |      | C8 H6 Br F3 O2     | 269.95073 | 1.122    |
| Level 4                 |      | C8 H6 Cl F2 O P S2 | 285.92537 | 0.932    |
| Level 4                 |      | C8 H6 F2 N2 O      | 184.04499 | 8.398    |
| Level 4                 |      | C8 H6 N2 O2        | 162.04327 | 2.148    |
| Level 4                 |      | C8 H6 O4           | 166.02686 | 19.39    |
| Level 4                 |      | C8 H6 O4           | 166.02637 | 23.906   |
| Level 4                 |      | C8 H7 F2 P S       | 203.99709 | 1.087    |
| Level 4                 |      | C8 H7 N O          | 133.05283 | 8.533    |
| Level 4                 |      | C8 H7 N O S2       | 196.99708 | 11.895   |
| Level 4                 |      | C8 H7 N O2 S       | 181.01986 | 8.777    |
| Level 4                 |      | C8 H7 N3 O         | 161.05894 | 6.232    |
| Level 4                 |      | C8 H8              | 104.06269 | 5.618    |
| Level 4                 |      | C8 H8 F N4 P       | 210.04639 | 6.209    |
| Level 4                 |      | C8 H8 N2 O         | 148.06386 | 6.253    |
| Level 4                 |      | C8 H8 N2 O         | 148.06385 | 6.482    |
| Level 4                 |      | C8 H8 N2 O         | 148.06385 | 9.327    |
| Level 4                 |      | C8 H8 N2 O2 S      | 196.03052 | 3.75     |
| Level 4                 |      | C8 H8 N4 O2        | 192.0623  | 2.516    |
| Level 4                 |      | C8 H8 N4 O2        | 192.06489 | 7.039    |
| Level 4                 |      | C8 H8 N4 O3        | 208.05984 | 6.235    |
| Level 4                 |      | C8 H8 O3 S         | 184.01915 | 6.7      |
| Level 4                 |      | C8 H9 N O2         | 151.0634  | 9.16     |
| Level 4                 |      | C8 H9 N O2 S       | 183.03506 | 7.618    |
| Level 4                 |      | C8 H9 N O3         | 167.05844 | 8.32     |
| Level 4                 |      | C8 H9 N3 O2        | 179.06952 | 11.188   |
| Level 4                 |      | C8 H9 N3 O3        | 195.06447 | 6.423    |

| Identification<br>level | Name | Formula           | Calc. MW  | RT [min] |
|-------------------------|------|-------------------|-----------|----------|
| Level 4                 |      | C8 H9 N3 O3       | 195.06446 | 6.971    |
| Level 4                 |      | C8 H9 N5 O        | 191.08081 | 4.2      |
| Level 4                 |      | C8 H9 N5 O        | 191.08079 | 6.293    |
| Level 4                 |      | C8 H9 N5 O        | 191.08069 | 6.548    |
| Level 4                 |      | C8 H9 N5 O2       | 207.0758  | 6.843    |
| Level 4                 |      | C8 H9 N5 O2 S     | 239.04767 | 9.022    |
| Level 4                 |      | C8 H9 N5 O3       | 223.07064 | 6.331    |
| Level 4                 |      | C9 H Cl2 N O S    | 240.91509 | 0.956    |
| Level 4                 |      | C9 H10 Cl N5 O2   | 255.05235 | 9.503    |
| Level 4                 |      | C9 H10 N2 O2      | 178.07424 | 5.729    |
| Level 4                 |      | C9 H10 N4 O2      | 206.08056 | 8.539    |
| Level 4                 |      | C9 H10 N4 O3      | 222.07545 | 7.122    |
| Level 4                 |      | C9 H10 N4 O3      | 222.07554 | 8.039    |
| Level 4                 |      | C9 H10 O          | 134.07303 | 9.132    |
| Level 4                 |      | C9 H11 F2 N5 O2   | 259.08804 | 7.777    |
| Level 4                 |      | C9 H11 F3 O       | 192.07599 | 6.015    |
| Level 4                 |      | C9 H11 N O2       | 165.07895 | 1.957    |
| Level 4                 |      | C9 H11 N O2       | 165.079   | 13.573   |
| Level 4                 |      | C9 H11 N O3       | 181.07387 | 5.093    |
| Level 4                 |      | C9 H11 N O3       | 181.07426 | 8.556    |
| Level 4                 |      | C9 H11 N O3 S     | 213.04601 | 6.756    |
| Level 4                 |      | C9 H11 N O4       | 197.069   | 6.534    |
| Level 4                 |      | C9 H11 N3 O2      | 193.08527 | 7.892    |
| Level 4                 |      | C9 H11 N3 O3      | 209.0802  | 6.84     |
| Level 4                 |      | C9 H11 N5 O3      | 237.0863  | 7.276    |
| Level 4                 |      | C9 H11 N5 O3      | 237.08614 | 8.133    |
| Level 4                 |      | C9 H11 N5 O3      | 237.08627 | 8.83     |
| Level 4                 |      | C9 H11 O          | 135.08015 | 2.103    |
| Level 4                 |      | C9 H12 Br3 N3 O S | 446.82512 | 1.007    |
| Level 4                 |      | C9 H12 F3 O4 P    | 272.04357 | 6.751    |
| Level 4                 |      | C9 H12 N2 O       | 164.09519 | 3.304    |
| Level 4                 |      | C9 H12 N2 O2      | 180.0899  | 4.66     |
| Level 4                 |      | C9 H12 N2 O2      | 180.09001 | 8.917    |
| Level 4                 |      | C9 H12 N2 O2      | 180.09003 | 9.209    |
| Level 4                 |      | C9 H12 N2 O2      | 180.09019 | 9.529    |
| Level 4                 |      | C9 H12 N2 O2      | 180.09038 | 9.657    |
| Level 4                 |      | C9 H12 N2 O3      | 196.08485 | 4.157    |
| Level 4                 |      | C9 H12 N4 O2 S    | 240.06811 | 10.576   |
| Level 4                 |      | C9 H12 N4 O3      | 224.09121 | 7.906    |
| Level 4                 |      | C9 H12 N4 O3 S    | 256.0631  | 6.859    |
| Level 4                 |      | C9 H12 O3         | 190.06287 | 8.452    |
| Level 4                 |      | C9 H13 F3 O4      | 242.07663 | 7.881    |
| Level 4                 |      | C9 H13 N O S      | 183.07211 | 7.39     |
| Level 4                 |      | C9 H13 N O S      | 183.07198 | 7.956    |

| Identification<br>level | Name | Formula          | Calc. MW  | RT [min] |
|-------------------------|------|------------------|-----------|----------|
| Level 4                 |      | C9 H13 N O3      | 183.08943 | 1.465    |
| Level 4                 |      | C9 H13 N O3      | 183.08998 | 9.381    |
| Level 4                 |      | C9 H13 N O3 S    | 215.06188 | 7.098    |
| Level 4                 |      | C9 H13 N O3 S2   | 247.03362 | 5.346    |
| Level 4                 |      | C9 H13 N O5 S    | 247.0515  | 8.111    |
| Level 4                 |      | C9 H13 N3 O      | 179.10602 | 5.402    |
| Level 4                 |      | C9 H13 N3 S2     | 227.05577 | 7.587    |
| Level 4                 |      | C9 H14 Cl N5     | 227.09405 | 12.338   |
| Level 4                 |      | C9 H14 Cl N5 O   | 243.08899 | 13.421   |
| Level 4                 |      | C9 H14 F2 S      | 192.07883 | 11.818   |
| Level 4                 |      | C9 H14 N2 O2     | 182.10576 | 6.326    |
| Level 4                 |      | C9 H14 N2 O2     | 182.10553 | 7.82     |
| Level 4                 |      | C9 H14 N2 O3     | 198.10049 | 1.933    |
| Level 4                 |      | C9 H14 N2 O3     | 198.10047 | 2.47     |
| Level 4                 |      | C9 H14 N2 O3     | 198.10044 | 2.624    |
| Level 4                 |      | C9 H14 N2 O3     | 198.10053 | 4.327    |
| Level 4                 |      | C9 H14 O3        | 170.09434 | 12.764   |
| Level 4                 |      | C9 H14 O4        | 203.11595 | 5.829    |
| Level 4                 |      | C9 H14 O5        | 202.08424 | 13.896   |
| Level 4                 |      | C9 H15 F O4      | 206.09465 | 10.595   |
| Level 4                 |      | C9 H15 F3 N3 O P | 269.09135 | 12.496   |
| Level 4                 |      | C9 H15 F3 N6     | 264.13072 | 2.955    |
| Level 4                 |      | C9 H15 F3 O2     | 212.10259 | 8.504    |
| Level 4                 |      | C9 H15 F3 O2     | 212.10228 | 12.084   |
| Level 4                 |      | C9 H15 F3 O3     | 228.09755 | 9.406    |
| Level 4                 |      | C9 H15 F3 O5     | 260.0872  | 4.497    |
| Level 4                 |      | C9 H15 F3 O5     | 260.08708 | 4.666    |
| Level 4                 |      | C9 H15 N O2      | 169.11023 | 2.522    |
| Level 4                 |      | C9 H15 N O3      | 185.1054  | 1.605    |
| Level 4                 |      | C9 H15 N O3      | 185.10544 | 10.287   |
| Level 4                 |      | C9 H15 N O3 S    | 217.07782 | 2.292    |
| Level 4                 |      | C9 H15 N3 O      | 181.12175 | 10.071   |
| Level 4                 |      | C9 H15 N3 O      | 181.12177 | 10.256   |
| Level 4                 |      | C9 H15 N3 O2     | 197.1165  | 2.274    |
| Level 4                 |      | C9 H15 N5        | 193.133   | 9.336    |
| Level 4                 |      | C9 H15 N5 O2     | 225.12259 | 3.799    |
| Level 4                 |      | C9 H16 Cl N5     | 229.10958 | 16.986   |
| Level 4                 |      | C9 H16 F2 N2 O S | 238.09539 | 8.025    |
| Level 4                 |      | C9 H16 N10 O2 P2 | 358.09317 | 11.781   |
| Level 4                 |      | C9 H16 N2 O2     | 184.12154 | 6.322    |
| Level 4                 |      | C9 H16 N2 O2     | 184.12139 | 8.25     |
| Level 4                 |      | C9 H16 O4        | 188.10478 | 7.408    |
| Level 4                 |      | C9 H16 O5        | 204.09971 | 6.998    |
| Level 4                 |      | C9 H16 O5        | 204.09966 | 7.281    |

| Identification<br>level | Name | Formula           | Calc. MW  | RT [min] |
|-------------------------|------|-------------------|-----------|----------|
| Level 4                 |      | C9 H16 O5         | 204.09966 | 7.601    |
| Level 4                 |      | C9 H16 O5         | 204.09972 | 8.091    |
| Level 4                 |      | C9 H17 F2 N S     | 209.10534 | 9.994    |
| Level 4                 |      | C9 H17 F3 N3 P S  | 287.08288 | 10.504   |
| Level 4                 |      | C9 H17 F3 N8 O S3 | 406.06327 | 8.631    |
| Level 4                 |      | C9 H17 F3 O2      | 214.11782 | 9.895    |
| Level 4                 |      | C9 H17 F3 O3      | 230.11287 | 8.135    |
| Level 4                 |      | C9 H17 N O        | 155.13108 | 10.375   |
| Level 4                 |      | C9 H17 N O2       | 153.11553 | 12.164   |
| Level 4                 |      | C9 H17 N O2       | 153.1155  | 12.921   |
| Level 4                 |      | C9 H17 N O3       | 187.1209  | 3.324    |
| Level 4                 |      | C9 H17 N3 O       | 183.13735 | 9.451    |
| Level 4                 |      | C9 H17 N4 O4 P S  | 308.06962 | 12.962   |
| Level 4                 |      | C9 H17 N5 O       | 211.14348 | 11.233   |
| Level 4                 |      | C9 H18 F2 O4 S2   | 292.06117 | 12.444   |
| Level 4                 |      | C9 H18 F2 S       | 196.11006 | 18.202   |
| Level 4                 |      | C9 H18 F5 N3 S    | 295.11439 | 13.969   |
| Level 4                 |      | C9 H18 N O4 P     | 235.09761 | 14.863   |
| Level 4                 |      | C9 H18 N2 O2      | 186.13673 | 1.748    |
| Level 4                 |      | C9 H18 O3         | 174.12581 | 13.78    |
| Level 4                 |      | C9 H18 O3         | 174.12565 | 9.38     |
| Level 4                 |      | C9 H18 O3         | 174.12562 | 10.881   |
| Level 4                 |      | C9 H18 O3         | 174.12557 | 11.076   |
| Level 4                 |      | C9 H18 O3         | 174.12555 | 11.637   |
| Level 4                 |      | C9 H18 O4         | 190.12044 | 7.853    |
| Level 4                 |      | C9 H18 O4         | 190.12041 | 8.146    |
| Level 4                 |      | C9 H18 O4         | 190.12041 | 8.276    |
| Level 4                 |      | C9 H18 O4         | 190.12057 | 8.341    |
| Level 4                 |      | C9 H18 O5         | 206.1153  | 7.764    |
| Level 4                 |      | C9 H18 O5         | 206.11531 | 7.889    |
| Level 4                 |      | C9 H18 O5         | 206.11535 | 8.125    |
| Level 4                 |      | C9 H18 O5         | 206.11535 | 8.454    |
| Level 4                 |      | C9 H18 O5         | 206.11535 | 8.728    |
| Level 4                 |      | C9 H18 O5         | 206.1153  | 8.968    |
| Level 4                 |      | C9 H18 O5         | 206.11531 | 9.109    |
| Level 4                 |      | C9 H18 O5         | 206.1155  | 9.405    |
| Level 4                 |      | C9 H18 O5         | 206.11533 | 10.875   |
| Level 4                 |      | C9 H18 O7         | 238.10521 | 4.605    |
| Level 4                 |      | C9 H19 F N P      | 191.12387 | 8.266    |
| Level 4                 |      | C9 H19 F N P      | 191.12398 | 8.509    |
| Level 4                 |      | C9 H19 F N3 P S   | 251.10215 | 6.289    |
| Level 4                 |      | C9 H19 F3 O S     | 232.1102  | 16.097   |
| Level 4                 |      | C9 H19 N O2       | 173.14183 | 10.534   |
| Level 4                 |      | C9 H19 N O4       | 205.13134 | 1.802    |

| Identification<br>level | Name | Formula           | Calc. MW  | RT [min] |
|-------------------------|------|-------------------|-----------|----------|
| Level 4                 |      | C9 H19 N O4       | 205.13158 | 7.408    |
| Level 4                 |      | C9 H19 N O5       | 221.12614 | 3.095    |
| Level 4                 |      | C9 H19 N O6       | 237.12121 | 7.161    |
| Level 4                 |      | C9 H19 N2 O2 Si   | 215.12151 | 9.578    |
| Level 4                 |      | C9 H19 N3 O2      | 201.1478  | 8.57     |
| Level 4                 |      | C9 H19 N9         | 253.17567 | 18.368   |
| Level 4                 |      | C9 H2 F5 O3 P     | 283.96633 | 1.078    |
| Level 4                 |      | C9 H2 N O3 P S2   | 266.92126 | 0.958    |
| Level 4                 |      | C9 H20 Cl F O2 P2 | 276.06108 | 4.589    |
| Level 4                 |      | C9 H20 F N2 O P   | 222.12959 | 7.265    |
| Level 4                 |      | C9 H20 N O2 S     | 206.1209  | 1.396    |
| Level 4                 |      | C9 H20 N2         | 156.16266 | 1.043    |
| Level 4                 |      | C9 H20 O P2 S     | 238.07032 | 6.706    |
| Level 4                 |      | C9 H20 O4         | 192.13615 | 8.695    |
| Level 4                 |      | C9 H20 O4         | 192.13616 | 8.956    |
| Level 4                 |      | C9 H20 O4         | 192.13633 | 9.102    |
| Level 4                 |      | C9 H20 O4         | 192.13621 | 9.404    |
| Level 4                 |      | C9 H20 O4         | 192.13624 | 9.566    |
| Level 4                 |      | C9 H20 O4         | 192.13613 | 9.721    |
| Level 4                 |      | C9 H20 O6         | 224.12585 | 5.482    |
| Level 4                 |      | C9 H20 O6 P2      | 286.07364 | 8.402    |
| Level 4                 |      | C9 H20 O6 P2      | 286.07358 | 8.512    |
| Level 4                 |      | C9 H21 F N O4 P   | 257.11951 | 1.393    |
| Level 4                 |      | C9 H21 F2 N O2 S  | 245.12605 | 1.85     |
| Level 4                 |      | C9 H21 F2 N P2 S  | 275.08415 | 15.01    |
| Level 4                 |      | C9 H21 F2 N S     | 213.1366  | 10.653   |
| Level 4                 |      | C9 H21 F3 N2 O2 S | 278.12679 | 11.121   |
| Level 4                 |      | C9 H21 N O4       | 207.14704 | 2.568    |
| Level 4                 |      | C9 H21 N O4       | 207.14705 | 8.391    |
| Level 4                 |      | C9 H21 N O5       | 223.14214 | 7.879    |
| Level 4                 |      | C9 H21 N O5       | 223.14189 | 8.707    |
| Level 4                 |      | C9 H21 N O5       | 223.14196 | 9.111    |
| Level 4                 |      | C9 H21 N O5       | 223.14214 | 9.406    |
| Level 4                 |      | C9 H22 F3 N2 O2 P | 278.13665 | 6.704    |
| Level 4                 |      | C9 H22 F4 N4      | 262.17815 | 16.734   |
| Level 4                 |      | C9 H22 N2 O2      | 190.16802 | 1.787    |
| Level 4                 |      | C9 H22 N4 S3      | 282.10073 | 13.175   |
| Level 4                 |      | C9 H23 F O P2 S   | 260.09246 | 12.07    |
| Level 4                 |      | C9 H23 F O7 S     | 294.11539 | 4.651    |
| Level 4                 |      | C9 H23 F2 N O S   | 231.14712 | 6.931    |
| Level 4                 |      | C9 H23 F3 N O2 P  | 265.14257 | 5.504    |
| Level 4                 |      | C9 H23 F3 N3 O P  | 277.15315 | 2.062    |
| Level 4                 |      | C9 H23 F3 N3 O3 P | 309.1436  | 7.128    |
| Level 4                 |      | C9 H23 F3 N3 P    | 261.15761 | 5.916    |

| Identification<br>level | Name | Formula               | Calc. MW  | RT [min] |
|-------------------------|------|-----------------------|-----------|----------|
| Level 4                 |      | C9 H23 F3 S           | 220.14649 | 17.274   |
| Level 4                 |      | C9 H23 F4 N2 O2 P     | 298.14322 | 12.441   |
| Level 4                 |      | C9 H23 N O4           | 209.16266 | 9.1      |
| Level 4                 |      | C9 H23 N8 O P         | 290.17353 | 15.651   |
| Level 4                 |      | C9 H24 F P S          | 214.13191 | 10.531   |
| Level 4                 |      | C9 H24 F2 O S         | 218.15167 | 11.077   |
| Level 4                 |      | C9 H24 F3 O5 P        | 300.13229 | 6.49     |
| Level 4                 |      | C9 H24 N O2 P S2      | 273.09917 | 9.331    |
| Level 4                 |      | C9 H25 F N2 O P2 S    | 290.11478 | 5.476    |
| Level 4                 |      | C9 H25 F N2 S2        | 244.14417 | 14.712   |
| Level 4                 |      | C9 H25 F2 N O S       | 233.16279 | 7.245    |
| Level 4                 |      | C9 H25 F2 N O2 S      | 249.15748 | 6.992    |
| Level 4                 |      | C9 H25 F2 N O3 S      | 265.15237 | 5.322    |
| Level 4                 |      | C9 H25 N10 O P        | 320.1947  | 2.003    |
| Level 4                 |      | C9 H26 Cl F2 N O2 S   | 285.13443 | 11.415   |
| Level 4                 |      | C9 H26 F N4 O3 P      | 288.17266 | 17.305   |
| Level 4                 |      | C9 H26 N10 O5         | 354.2087  | 13.006   |
| Level 4                 |      | C9 H26 N5 O4 P S      | 331.14528 | 15.549   |
| Level 4                 |      | C9 H26 N9 O P         | 307.19947 | 15.617   |
| Level 4                 |      | C9 H27 F2 N O S       | 235.17821 | 8.145    |
| Level 4                 |      | C9 H27 F2 N O S       | 235.17818 | 8.345    |
| Level 4                 |      | C9 H27 F2 N O S       | 235.1782  | 8.489    |
| Level 4                 |      | C9 H27 F2 N O2 S      | 251.17313 | 8.128    |
| Level 4                 |      | C9 H27 F2 N O2 S      | 251.17313 | 8.726    |
| Level 4                 |      | C9 H27 F3 N3 O2 P     | 297.18036 | 6.406    |
| Level 4                 |      | C9 H27 F4 O2 P        | 274.16795 | 18.863   |
| Level 4                 |      | C9 H27 F4 O4 P        | 306.15846 | 13.783   |
| Level 4                 |      | C9 H28 F N O3 P2      | 279.15282 | 17.645   |
| Level 4                 |      | C9 H28 F N5 O2 S3     | 353.13755 | 8.345    |
| Level 4                 |      | C9 H28 N O P3 S       | 291.11095 | 7.262    |
| Level 4                 |      | C9 H28 N8 O3 P2       | 358.17552 | 13.559   |
| Level 4                 |      | C9 H29 F N6 O S3      | 352.15585 | 19.266   |
| Level 4                 |      | C9 H29 F2 N O S       | 237.19388 | 8.687    |
| Level 4                 |      | C9 H29 F2 N O S       | 237.19386 | 8.955    |
| Level 4                 |      | C9 H29 F2 N O S       | 237.1939  | 9.408    |
| Level 4                 |      | C9 H29 F5 N6 O4       | 380.21748 | 19.371   |
| Level 4                 |      | C9 H29 F5 N8 S3       | 440.15985 | 15.624   |
| Level 4                 |      | C9 H29 F6 N5 O S      | 369.19964 | 8.794    |
| Level 4                 |      | C9 H29 F7 N P3        | 377.13897 | 10.034   |
| Level 4                 |      | C9 H29 F8 N2 P        | 348.19351 | 15.302   |
| Level 4                 |      | C9 H29 N5 O4 S        | 303.19493 | 6.29     |
| Level 4                 |      | C9 H29 O7 P           | 280.16538 | 18.387   |
| Level 4                 |      | C9 H3 Cl F3 N4 O P S5 | 465.82932 | 1.079    |
| Level 4                 |      | C9 H3 Cl N2 O3 S5     | 381.8443  | 1.114    |



| Identification<br>level | Name | Formula            | Calc. MW  | RT [min] |
|-------------------------|------|--------------------|-----------|----------|
| Level 4                 |      | C9 H30 F2 N2 O5 P2 | 346.16038 | 15.869   |
| Level 4                 |      | C9 H30 N8 O P2 S2  | 392.14451 | 11.324   |
| Level 4                 |      | C9 H31 F N6 O2 S3  | 370.16624 | 19.269   |
| Level 4                 |      | C9 H31 N3 O3 S3    | 325.15254 | 7.858    |
| Level 4                 |      | C9 H31 N4 P S2     | 290.17327 | 13.38    |
| Level 4                 |      | C9 H31 P3 S        | 264.136   | 13.229   |
| Level 4                 |      | C9 H4 Cl O P S2    | 257.91286 | 0.944    |
| Level 4                 |      | C9 H4 Cl2 F3 P S   | 301.91019 | 12.57    |
| Level 4                 |      | C9 H4 F5 N3 O6     | 345.00168 | 1.287    |
| Level 4                 |      | C9 H4 O4           | 176.01106 | 1.044    |
| Level 4                 |      | C9 H5 F18 N6 P S   | 601.97559 | 17.256   |
| Level 4                 |      | C9 H6 Cl3 N3 O9    | 404.91657 | 29.348   |
| Level 4                 |      | C9 H6 I N O2 S2    | 350.88815 | 1.156    |
| Level 4                 |      | C9 H7 N O          | 145.05289 | 5.845    |
| Level 4                 |      | C9 H7 N O2         | 161.04779 | 5.912    |
| Level 4                 |      | C9 H7 N O2         | 161.04768 | 9.432    |
| Level 4                 |      | C9 H7 N O2         | 161.04787 | 9.736    |
| Level 4                 |      | C9 H7 N O3         | 177.04251 | 2.765    |
| Level 4                 |      | C9 H7 N O3         | 177.0428  | 10.238   |
| Level 4                 |      | C9 H7 N5 O2        | 217.06012 | 8.211    |
| Level 4                 |      | C9 H8 Br F3 N2 O   | 295.97698 | 13.561   |
| Level 4                 |      | C9 H8 Br3 N O4     | 430.8011  | 21.018   |
| Level 4                 |      | C9 H8 Cl N6 O P S  | 313.99089 | 5.636    |
| Level 4                 |      | C9 H8 N2 O         | 160.06376 | 8.672    |
| Level 4                 |      | C9 H8 N2 O2        | 176.05861 | 2.237    |
| Level 4                 |      | C9 H8 O4           | 180.04215 | 19.389   |
| Level 4                 |      | C9 H9 N O          | 147.06851 | 10.589   |
| Level 4                 |      | C9 H9 N O S        | 179.04065 | 9.624    |
| Level 4                 |      | C9 H9 N O2         | 163.06343 | 9.041    |
| Level 4                 |      | C9 H9 N O2         | 163.06343 | 9.125    |
| Level 4                 |      | C9 H9 N O2         | 163.06345 | 9.358    |
| Level 4                 |      | C9 H9 N O2         | 163.06324 | 11.667   |
| Level 4                 |      | C9 H9 N O2         | 163.06342 | 11.921   |
| Level 4                 |      | C9 H9 N O3         | 179.0582  | 1.742    |
| Level 4                 |      | C9 H9 N O3         | 179.05818 | 2.23     |
| Level 4                 |      | C9 H9 N3 O2        | 191.06951 | 11.347   |
| Level 4                 |      | C9 H9 N3 O2        | 191.06951 | 12.465   |
| Level 4                 |      | C9 H9 N3 O3        | 207.06451 | 7.258    |
| Level 4                 |      | Ce F4              | 215.89929 | 1.111    |
| Level 4                 |      | Eu S               | 184.89301 | 0.957    |
| Level 4                 |      | F P S2             | 113.91608 | 1.089    |
| Level 4                 |      | F4 O S             | 123.96034 | 0.956    |
| Level 4                 |      | F4 O S             | 123.9603  | 1.104    |
| Level 4                 |      | F9 P Si3           | 285.89039 | 1.131    |

| Identification<br>level | Name | Formula      | Calc. MW   | RT [min] |
|-------------------------|------|--------------|------------|----------|
| Level 4                 |      | H2 O5 Sn2    | 321.79527  | 1.162    |
| Level 4                 |      | H3 O3 Sc     | 95.96418   | 0.937    |
| Level 4                 |      | H3 O3 Sc     | 95.9642    | 0.986    |
| Level 4                 |      | H4 Cl N2 P S | 129.95229  | 1.015    |
| Level 4                 |      | H4 Cl N2 P S | 129.95238  | 1.172    |
| Level 4                 |      | I3 Tl        | 585.68932  | 15.574   |
| Level 4                 |      | Mg O4 S      | 119.93711  | 0.953    |
| Level 5                 |      |              | 235.65265  | 1.526    |
| Level 5                 |      |              | 159.12434  | 8.345    |
| Level 5                 |      |              | 246.59172  | 9.26     |
| Level 5                 |      |              | 650.42058  | 12.121   |
| Level 5                 |      |              | 546.65807  | 15.06    |
| Level 5                 |      |              | 627.52477  | 17.706   |
| Level 5                 |      |              | 569.73015  | 18.054   |
| Level 5                 |      |              | 586.49123  | 18.098   |
| Level 5                 |      |              | 1110.72385 | 18.623   |
| Level 5                 |      |              | 1230.91233 | 19.396   |
| Level 5                 |      |              | 688.48033  | 19.66    |
| Level 5                 |      |              | 673.49509  | 20.024   |
| Level 5                 |      |              | 408.76957  | 20.333   |
| Level 5                 |      |              | 907.76836  | 24.354   |
| Level 5                 |      |              | 894.76732  | 25.419   |
| Level 5                 |      |              | 868.74932  | 26.502   |
| Level 5                 |      |              | 868.74986  | 26.702   |
| Level 5                 |      |              | 851.79503  | 28.842   |
| Level 5                 |      |              | 889.81212  | 29.136   |
| Level 5                 |      |              | 119.04889  | 29.339   |
| Level 5                 |      |              | 145.02269  | 29.351   |
| Level 5                 |      |              | 104.01277  | 0.898    |
| Level 5                 |      |              | 517.74925  | 0.903    |
| Level 5                 |      |              | 90.01665   | 0.903    |
| Level 5                 |      |              | 201.97267  | 0.905    |
| Level 5                 |      |              | 471.75823  | 0.908    |
| Level 5                 |      |              | 207.9117   | 0.91     |
| Level 5                 |      |              | 343.81769  | 0.92     |
| Level 5                 |      |              | 120.97805  | 0.922    |
| Level 5                 |      |              | 103.01186  | 0.922    |
| Level 5                 |      |              | 227.87751  | 0.933    |
| Level 5                 |      |              | 132.01009  | 0.935    |
| Level 5                 |      |              | 373.80489  | 0.938    |
| Level 5                 |      |              | 421.78115  | 0.939    |
| Level 5                 |      |              | 132.00766  | 0.94     |
| Level 5                 |      |              | 145.02248  | 0.94     |
| Level 5                 |      |              | 146.98437  | 0.941    |

| Identification<br>level | Name | Formula | Calc. MW  | RT [min] |
|-------------------------|------|---------|-----------|----------|
| Level 5                 |      |         | 131.00683 | 0.941    |
| Level 5                 |      |         | 133.0281  | 0.942    |
| Level 5                 |      |         | 147.96839 | 0.942    |
| Level 5                 |      |         | 125.99334 | 0.943    |
| Level 5                 |      |         | 161.98398 | 0.943    |
| Level 5                 |      |         | 128.97383 | 0.944    |
| Level 5                 |      |         | 129.95778 | 0.944    |
| Level 5                 |      |         | 116.98181 | 0.944    |
| Level 5                 |      |         | 133.03057 | 0.944    |
| Level 5                 |      |         | 133.91496 | 0.945    |
| Level 5                 |      |         | 103.96715 | 0.945    |
| Level 5                 |      |         | 83.95231  | 0.945    |
| Level 5                 |      |         | 112.99618 | 0.945    |
| Level 5                 |      |         | 154.96613 | 0.946    |
| Level 5                 |      |         | 119.01239 | 0.946    |
| Level 5                 |      |         | 85.98538  | 0.947    |
| Level 5                 |      |         | 86.98619  | 0.947    |
| Level 5                 |      |         | 101.00182 | 0.947    |
| Level 5                 |      |         | 107.98276 | 0.948    |
| Level 5                 |      |         | 105.95579 | 0.948    |
| Level 5                 |      |         | 142.98948 | 0.948    |
| Level 5                 |      |         | 100.00106 | 0.949    |
| Level 5                 |      |         | 118.01158 | 0.949    |
| Level 5                 |      |         | 103.99593 | 0.949    |
| Level 5                 |      |         | 111.97767 | 0.949    |
| Level 5                 |      |         | 121.97767 | 0.95     |
| Level 5                 |      |         | 104.99671 | 0.95     |
| Level 5                 |      |         | 133.98907 | 0.95     |
| Level 5                 |      |         | 115.97855 | 0.95     |
| Level 5                 |      |         | 137.98407 | 0.95     |
| Level 5                 |      |         | 87.94521  | 0.95     |
| Level 5                 |      |         | 507.704   | 0.951    |
| Level 5                 |      |         | 119.97344 | 0.951    |
| Level 5                 |      |         | 93.9671   | 0.951    |
| Level 5                 |      |         | 84.95565  | 0.951    |
| Level 5                 |      |         | 453.69719 | 0.952    |
| Level 5                 |      |         | 339.80562 | 0.953    |
| Level 5                 |      |         | 127.0119  | 0.953    |
| Level 5                 |      |         | 231.90669 | 0.953    |
| Level 5                 |      |         | 132.99208 | 0.953    |
| Level 5                 |      |         | 91.97864  | 0.955    |
| Level 5                 |      |         | 102.96619 | 0.955    |
| Level 5                 |      |         | 138.99665 | 0.955    |
| Level 5                 |      |         | 136.9637  | 0.958    |

| Identification<br>level | Name | Formula | Calc. MW  | RT [min] |
|-------------------------|------|---------|-----------|----------|
| Level 5                 |      |         | 223.88899 | 0.96     |
| Level 5                 |      |         | 109.97988 | 0.961    |
| Level 5                 |      |         | 123.00729 | 0.961    |
| Level 5                 |      |         | 154.97418 | 0.961    |
| Level 5                 |      |         | 118.95332 | 0.963    |
| Level 5                 |      |         | 109.94469 | 0.963    |
| Level 5                 |      |         | 120.98591 | 0.964    |
| Level 5                 |      |         | 127.95524 | 0.964    |
| Level 5                 |      |         | 150.97958 | 0.968    |
| Level 5                 |      |         | 386.79949 | 0.969    |
| Level 5                 |      |         | 253.84409 | 0.974    |
| Level 5                 |      |         | 109.95282 | 0.974    |
| Level 5                 |      |         | 211.86268 | 0.975    |
| Level 5                 |      |         | 100.94264 | 0.975    |
| Level 5                 |      |         | 195.86829 | 0.976    |
| Level 5                 |      |         | 489.7224  | 0.977    |
| Level 5                 |      |         | 521.68579 | 0.977    |
| Level 5                 |      |         | 91.93412  | 0.98     |
| Level 5                 |      |         | 378.81835 | 0.983    |
| Level 5                 |      |         | 387.78512 | 0.984    |
| Level 5                 |      |         | 353.88219 | 0.984    |
| Level 5                 |      |         | 345.79323 | 0.986    |
| Level 5                 |      |         | 553.71709 | 0.986    |
| Level 5                 |      |         | 577.70354 | 0.987    |
| Level 5                 |      |         | 455.80068 | 0.989    |
| Level 5                 |      |         | 483.79079 | 0.99     |
| Level 5                 |      |         | 87.98373  | 0.997    |
| Level 5                 |      |         | 467.76775 | 0.997    |
| Level 5                 |      |         | 118.94499 | 1        |
| Level 5                 |      |         | 407.80196 | 1        |
| Level 5                 |      |         | 413.80712 | 1        |
| Level 5                 |      |         | 653.64433 | 1.003    |
| Level 5                 |      |         | 164.12438 | 1.007    |
| Level 5                 |      |         | 459.76784 | 1.008    |
| Level 5                 |      |         | 528.78349 | 1.008    |
| Level 5                 |      |         | 97.96803  | 1.008    |
| Level 5                 |      |         | 207.91151 | 1.011    |
| Level 5                 |      |         | 471.7594  | 1.013    |
| Level 5                 |      |         | 353.74794 | 1.013    |
| Level 5                 |      |         | 155.96746 | 1.016    |
| Level 5                 |      |         | 463.72695 | 1.018    |
| Level 5                 |      |         | 361.76122 | 1.018    |
| Level 5                 |      |         | 345.79262 | 1.019    |
| Level 5                 |      |         | 491.72066 | 1.019    |

| Identification<br>level | Name | Formula | Calc. MW  | RT [min] |
|-------------------------|------|---------|-----------|----------|
| Level 5                 |      |         | 605.71843 | 1.021    |
| Level 5                 |      |         | 113.8854  | 1.025    |
| Level 5                 |      |         | 129.98799 | 1.025    |
| Level 5                 |      |         | 114.01663 | 1.025    |
| Level 5                 |      |         | 95.91444  | 1.025    |
| Level 5                 |      |         | 445.808   | 1.027    |
| Level 5                 |      |         | 129.9942  | 1.028    |
| Level 5                 |      |         | 575.77604 | 1.03     |
| Level 5                 |      |         | 138.90739 | 1.03     |
| Level 5                 |      |         | 122.93344 | 1.03     |
| Level 5                 |      |         | 505.76915 | 1.031    |
| Level 5                 |      |         | 395.82746 | 1.031    |
| Level 5                 |      |         | 303.80373 | 1.033    |
| Level 5                 |      |         | 673.77503 | 1.035    |
| Level 5                 |      |         | 372.83101 | 1.036    |
| Level 5                 |      |         | 461.77303 | 1.036    |
| Level 5                 |      |         | 497.75412 | 1.036    |
| Level 5                 |      |         | 372.82045 | 1.038    |
| Level 5                 |      |         | 309.83369 | 1.038    |
| Level 5                 |      |         | 667.75981 | 1.041    |
| Level 5                 |      |         | 77.94832  | 1.044    |
| Level 5                 |      |         | 563.80496 | 1.044    |
| Level 5                 |      |         | 162.02037 | 1.045    |
| Level 5                 |      |         | 585.80705 | 1.045    |
| Level 5                 |      |         | 203.90354 | 1.046    |
| Level 5                 |      |         | 719.69475 | 1.047    |
| Level 5                 |      |         | 621.76901 | 1.05     |
| Level 5                 |      |         | 469.80355 | 1.051    |
| Level 5                 |      |         | 157.92948 | 1.051    |
| Level 5                 |      |         | 252.89104 | 1.051    |
| Level 5                 |      |         | 83.95233  | 1.051    |
| Level 5                 |      |         | 290.88768 | 1.053    |
| Level 5                 |      |         | 461.82555 | 1.054    |
| Level 5                 |      |         | 141.97096 | 1.055    |
| Level 5                 |      |         | 492.82071 | 1.055    |
| Level 5                 |      |         | 122.0428  | 1.056    |
| Level 5                 |      |         | 197.8775  | 1.058    |
| Level 5                 |      |         | 583.79134 | 1.059    |
| Level 5                 |      |         | 208.92249 | 1.061    |
| Level 5                 |      |         | 286.84403 | 1.063    |
| Level 5                 |      |         | 517.74493 | 1.063    |
| Level 5                 |      |         | 278.81178 | 1.064    |
| Level 5                 |      |         | 391.77994 | 1.064    |
| Level 5                 |      |         | 567.73906 | 1.065    |

| Identification<br>level | Name | Formula | Calc. MW  | RT [min] |
|-------------------------|------|---------|-----------|----------|
| Level 5                 |      |         | 479.77245 | 1.065    |
| Level 5                 |      |         | 209.84846 | 1.065    |
| Level 5                 |      |         | 637.74587 | 1.071    |
| Level 5                 |      |         | 95.94998  | 1.072    |
| Level 5                 |      |         | 579.79045 | 1.073    |
| Level 5                 |      |         | 251.85573 | 1.08     |
| Level 5                 |      |         | 236.86729 | 1.082    |
| Level 5                 |      |         | 622.77971 | 1.086    |
| Level 5                 |      |         | 139.91876 | 1.09     |
| Level 5                 |      |         | 347.78755 | 1.09     |
| Level 5                 |      |         | 559.73052 | 1.092    |
| Level 5                 |      |         | 575.77574 | 1.093    |
| Level 5                 |      |         | 543.75481 | 1.093    |
| Level 5                 |      |         | 573.77337 | 1.094    |
| Level 5                 |      |         | 131.92668 | 1.096    |
| Level 5                 |      |         | 391.79699 | 1.1      |
| Level 5                 |      |         | 389.8774  | 1.104    |
| Level 5                 |      |         | 143.9214  | 1.105    |
| Level 5                 |      |         | 151.88982 | 1.105    |
| Level 5                 |      |         | 587.80419 | 1.111    |
| Level 5                 |      |         | 569.76096 | 1.114    |
| Level 5                 |      |         | 554.79287 | 1.114    |
| Level 5                 |      |         | 615.75538 | 1.119    |
| Level 5                 |      |         | 106.02548 | 1.121    |
| Level 5                 |      |         | 141.89335 | 1.122    |
| Level 5                 |      |         | 585.80705 | 1.123    |
| Level 5                 |      |         | 154.97423 | 1.13     |
| Level 5                 |      |         | 109.9447  | 1.131    |
| Level 5                 |      |         | 569.76451 | 1.132    |
| Level 5                 |      |         | 497.76198 | 1.132    |
| Level 5                 |      |         | 381.84685 | 1.133    |
| Level 5                 |      |         | 136.96372 | 1.133    |
| Level 5                 |      |         | 275.81001 | 1.138    |
| Level 5                 |      |         | 519.74272 | 1.147    |
| Level 5                 |      |         | 118.98941 | 1.155    |
| Level 5                 |      |         | 112.99627 | 1.167    |
| Level 5                 |      |         | 132.00761 | 1.168    |
| Level 5                 |      |         | 206.92664 | 1.171    |
| Level 5                 |      |         | 379.75371 | 1.172    |
| Level 5                 |      |         | 131.00683 | 1.175    |
| Level 5                 |      |         | 641.76018 | 1.179    |
| Level 5                 |      |         | 146.98434 | 1.185    |
| Level 5                 |      |         | 127.06222 | 1.218    |
| Level 5                 |      |         | 599.77672 | 1.25     |

| Identification<br>level | Name | Formula | Calc. MW  | RT [min] |
|-------------------------|------|---------|-----------|----------|
| Level 5                 |      |         | 148.00484 | 1.251    |
| Level 5                 |      |         | 595.76341 | 1.262    |
| Level 5                 |      |         | 176.12409 | 1.274    |
| Level 5                 |      |         | 134.09503 | 5.808    |
| Level 5                 |      |         | 191.63954 | 7.923    |

Figure S2: Comparison of the node and sample signatures

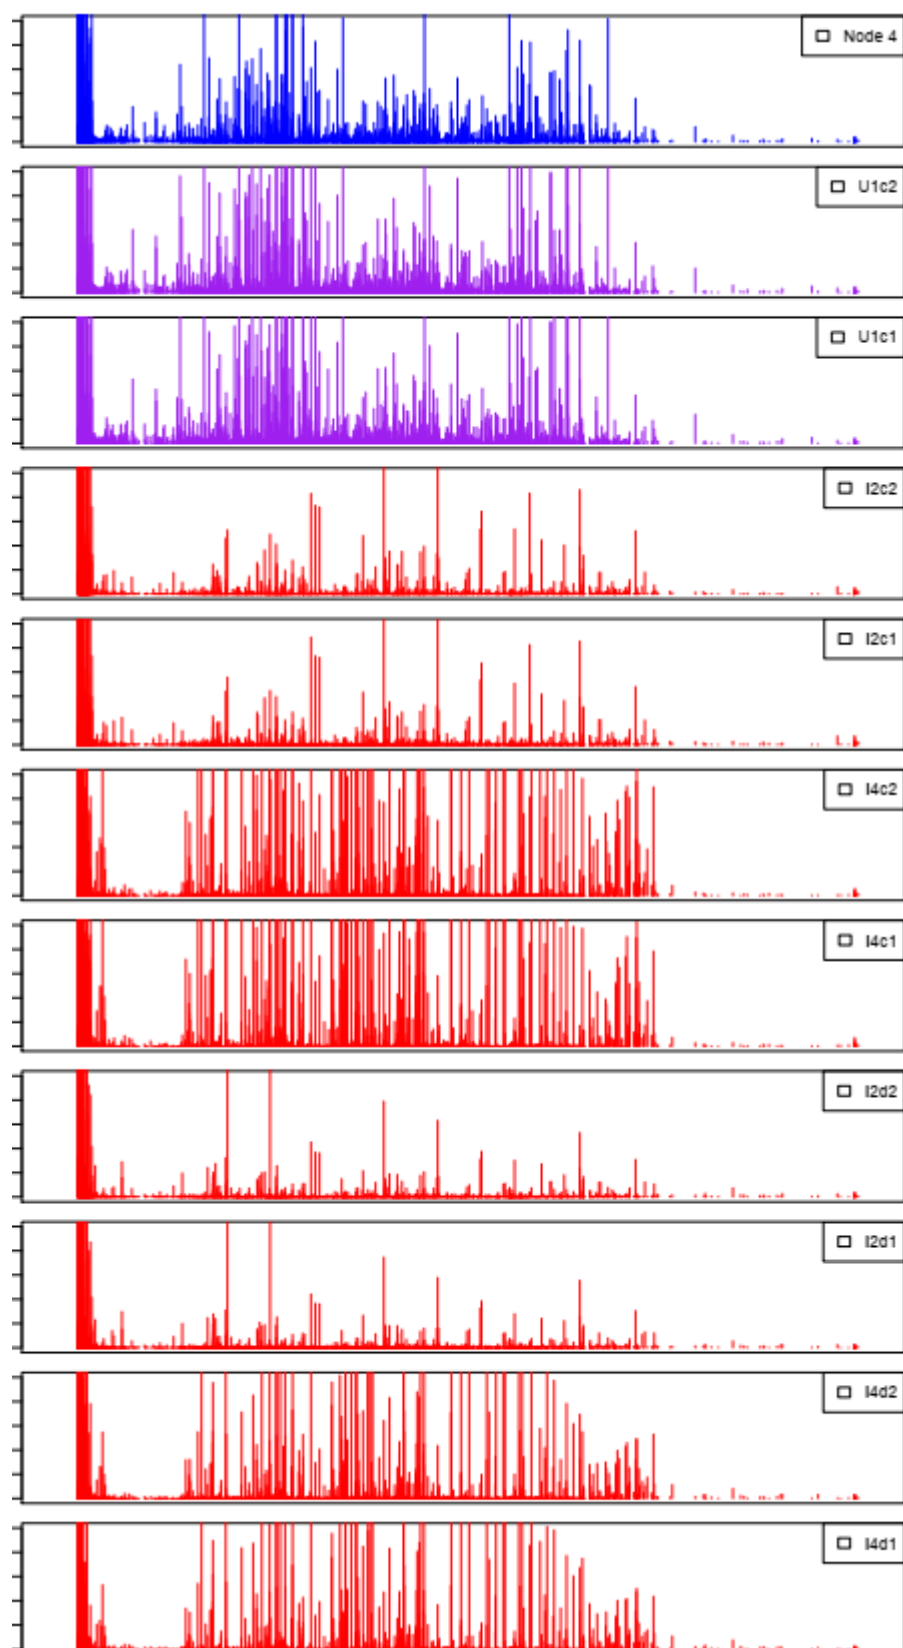



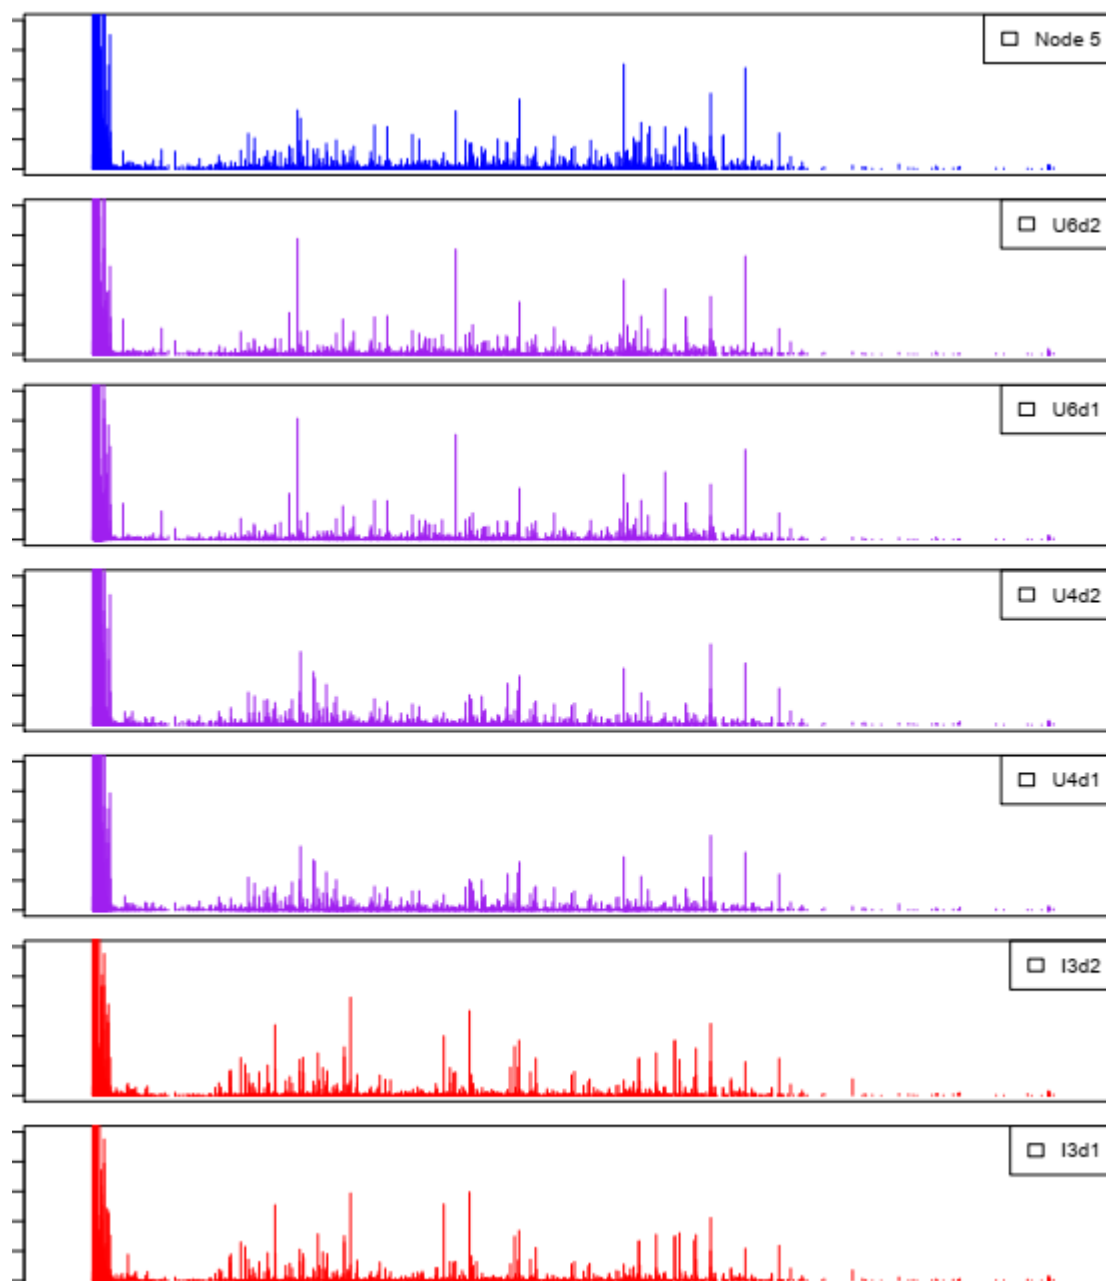

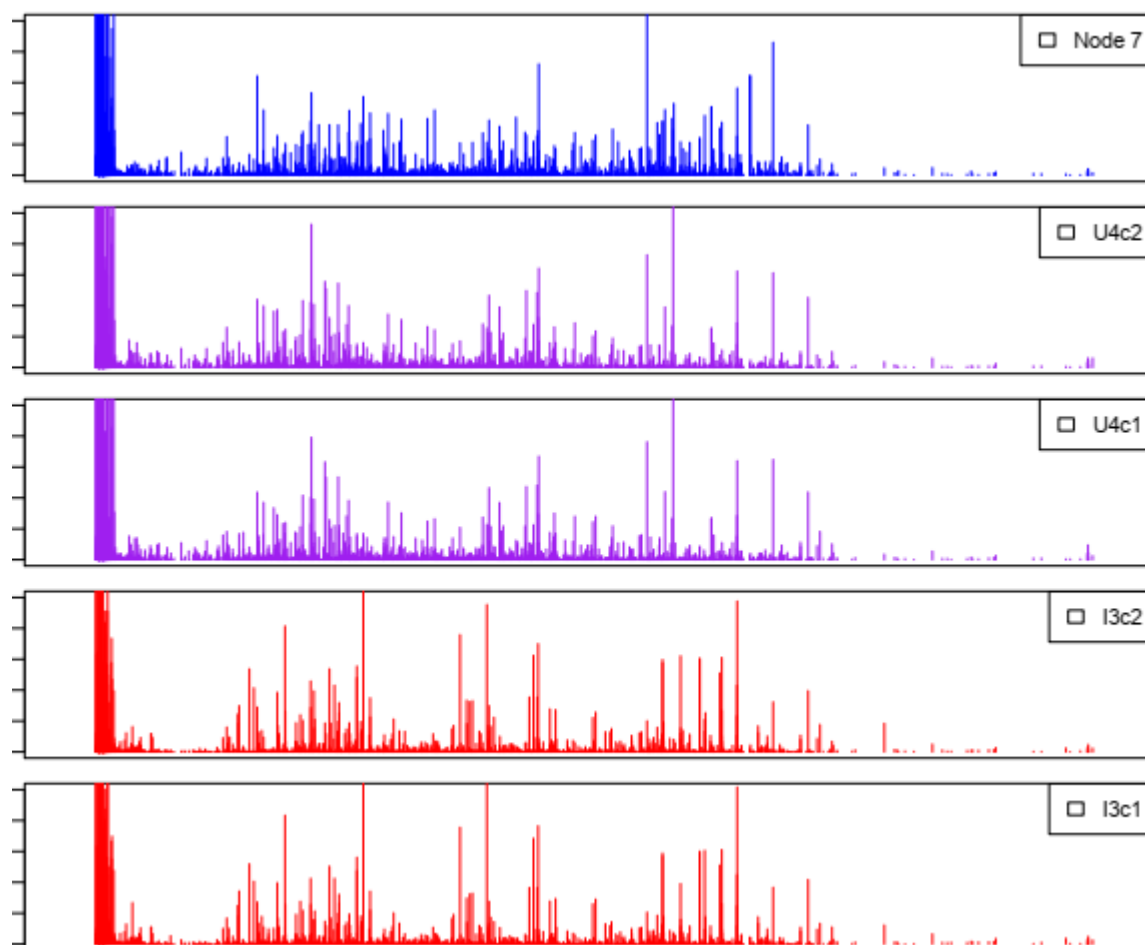

Supplement: s1 [file s1]
